# Supplementary material for: Development, physicochemical characterization and in-vitro biocompatibility study of dromedary camel dentine derived hydroxyapatite for bone repair
Source: PeerJ. 2023 Aug 3;11:e15711. doi: 10.7717/peerj.15711 (PMC10404400; doi:10.7717/peerj.15711)
Supplement: Supplemental Information 1 [file peerj-11-15711-s001.xlsx]

## Sheet: Sheet1
Wavenumber	-2
399.264	0.284039
401.193	0.279051
403.122	0.275339
405.05	0.271728
406.979	0.268068
408.908	0.26608
410.837	0.264763
412.766	0.262125
414.694	0.259667
416.623	0.253845
418.552	0.246869
420.481	0.247036
422.41	0.247595
424.339	0.245458
426.267	0.244322
428.196	0.24289
430.125	0.240555
432.054	0.237894
433.983	0.236413
435.911	0.235996
437.84	0.235136
439.769	0.23425
441.698	0.231805
443.627	0.229348
445.555	0.229073
447.484	0.22832
449.413	0.22767
451.342	0.227927
453.271	0.228265
455.2	0.229109
457.128	0.231048
459.057	0.235157
460.986	0.239021
462.915	0.241305
464.844	0.243134
466.772	0.244785
468.701	0.248778
470.63	0.255374
472.559	0.260778
474.488	0.261037
476.416	0.255481
478.345	0.247604
480.274	0.240301
482.203	0.234488
484.132	0.230745
486.06	0.228563
487.989	0.227374
489.918	0.226171
491.847	0.224308
493.776	0.223398
495.705	0.22352
497.633	0.223079
499.562	0.222374
501.491	0.222791
503.42	0.224958
505.349	0.227722
507.277	0.229917
509.206	0.231828
511.135	0.233649
513.064	0.235113
514.993	0.236333
516.921	0.237944
518.85	0.240987
520.779	0.246135
522.708	0.252026
524.637	0.256652
526.566	0.260951
528.494	0.266532
530.423	0.272818
532.352	0.279602
534.281	0.287843
536.21	0.297781
538.138	0.309076
540.067	0.321831
541.996	0.335794
543.925	0.349853
545.854	0.363474
547.782	0.378199
549.711	0.397335
551.64	0.422605
553.569	0.454533
555.498	0.495296
557.427	0.548292
559.355	0.615576
561.284	0.695829
563.213	0.78564
565.142	0.878833
567.071	0.963095
568.999	1.02265
570.928	1.04779
572.857	1.03494
574.786	0.978994
576.715	0.880564
578.643	0.76117
580.572	0.648674
582.501	0.559996
584.43	0.500182
586.359	0.464093
588.287	0.442029
590.216	0.432889
592.145	0.447048
594.074	0.493737
596.003	0.584475
597.932	0.726609
599.86	0.887441
601.789	0.989106
603.718	0.972166
605.647	0.849527
607.576	0.699646
609.504	0.581618
611.433	0.505689
613.362	0.460337
615.291	0.434037
617.22	0.420705
619.148	0.419267
621.077	0.432764
623.006	0.462971
624.935	0.509793
626.864	0.568491
628.793	0.623513
630.721	0.65767
632.65	0.664518
634.579	0.64658
636.508	0.610673
638.437	0.566785
640.365	0.521294
642.294	0.477981
644.223	0.439616
646.152	0.407291
648.081	0.38071
650.009	0.359691
651.938	0.343663
653.867	0.330774
655.796	0.320314
657.725	0.311928
659.654	0.304843
661.582	0.298262
663.511	0.292964
665.44	0.286347
667.369	0.2769
669.298	0.274381
671.226	0.276239
673.155	0.273769
675.084	0.269815
677.013	0.266182
678.942	0.262059
680.87	0.257893
682.799	0.254018
684.728	0.251345
686.657	0.249429
688.586	0.248004
690.515	0.247193
692.443	0.246428
694.372	0.245457
696.301	0.244117
698.23	0.242219
700.159	0.239888
702.087	0.23801
704.016	0.23683
705.945	0.23606
707.874	0.235984
709.803	0.236155
711.731	0.23584
713.66	0.234967
715.589	0.233532
717.518	0.231399
719.447	0.228838
721.375	0.226711
723.304	0.225281
725.233	0.224485
727.162	0.22448
729.091	0.224487
731.02	0.223861
732.948	0.222633
734.877	0.220606
736.806	0.218297
738.735	0.216459
740.664	0.21558
742.592	0.215909
744.521	0.216797
746.45	0.217768
748.379	0.218448
750.308	0.218223
752.236	0.217115
754.165	0.215472
756.094	0.213908
758.023	0.213087
759.952	0.213116
761.881	0.213825
763.809	0.214879
765.738	0.215604
767.667	0.215572
769.596	0.214795
771.525	0.21321
773.453	0.211257
775.382	0.209987
777.311	0.210012
779.24	0.211128
781.169	0.212622
783.097	0.213907
785.026	0.214651
786.955	0.214584
788.884	0.213699
790.813	0.212409
792.742	0.2115
794.67	0.211622
796.599	0.212856
798.528	0.214742
800.457	0.21662
802.386	0.218065
804.314	0.218438
806.243	0.217504
808.172	0.21611
810.101	0.214953
812.03	0.214657
813.958	0.215643
815.887	0.217469
817.816	0.219393
819.745	0.220875
821.674	0.221837
823.602	0.222183
825.531	0.221867
827.46	0.221456
829.389	0.221553
831.318	0.222377
833.247	0.224015
835.175	0.226426
837.104	0.228827
839.033	0.23044
840.962	0.231347
842.891	0.231762
844.819	0.232066
846.748	0.232766
848.677	0.234009
850.606	0.23591
852.535	0.238351
854.463	0.240841
856.392	0.243111
858.321	0.244944
860.25	0.246477
862.179	0.247991
864.108	0.249573
866.036	0.252296
867.965	0.25635
869.894	0.26186
871.823	0.268823
873.752	0.272281
875.68	0.270963
877.609	0.271427
879.538	0.273551
881.467	0.271615
883.396	0.267652
885.324	0.267021
887.253	0.269227
889.182	0.271955
891.111	0.27493
893.04	0.277795
894.969	0.280147
896.897	0.282076
898.826	0.283691
900.755	0.285276
902.684	0.287234
904.613	0.289814
906.541	0.293062
908.47	0.296832
910.399	0.300748
912.328	0.304346
914.257	0.307599
916.185	0.310756
918.114	0.313942
920.043	0.317331
921.972	0.321012
923.901	0.325131
925.83	0.329726
927.758	0.334478
929.687	0.339159
931.616	0.343729
933.545	0.348032
935.474	0.351885
937.402	0.356173
939.331	0.361462
941.26	0.367771
943.189	0.375325
945.118	0.383031
947.046	0.389845
948.975	0.396197
950.904	0.403603
952.833	0.411731
954.762	0.422441
956.69	0.43989
958.619	0.468438
960.548	0.518447
962.477	0.55512
964.406	0.515649
966.335	0.453412
968.263	0.429154
970.192	0.429411
972.121	0.4355
974.05	0.443709
975.979	0.452886
977.907	0.464148
979.836	0.476411
981.765	0.488712
983.694	0.499404
985.623	0.507873
987.551	0.51626
989.48	0.526015
991.409	0.537482
993.338	0.550504
995.267	0.565425
997.196	0.582384
999.124	0.601566
1001.05	0.623071
1002.98	0.646799
1004.91	0.673616
1006.84	0.704219
1008.77	0.739473
1010.7	0.77971
1012.63	0.824908
1014.55	0.877091
1016.48	0.938397
1018.41	1.00702
1020.34	1.0837
1022.27	1.1782
1024.2	1.29585
1026.13	1.41747
1028.06	1.52545
1029.99	1.64251
1031.91	1.77964
1033.84	1.88649
1035.77	1.93221
1037.7	1.9647
1039.63	2.02124
1041.56	2.08019
1043.49	2.11463
1045.42	2.12983
1047.34	2.12615
1049.27	2.10496
1051.2	2.07513
1053.13	2.04493
1055.06	2.01761
1056.99	1.98917
1058.92	1.95912
1060.85	1.92536
1062.78	1.87678
1064.7	1.81527
1066.63	1.74649
1068.56	1.67009
1070.49	1.5907
1072.42	1.50721
1074.35	1.41182
1076.28	1.29514
1078.21	1.16926
1080.13	1.06904
1082.06	1.03209
1083.99	1.09116
1085.92	1.24809
1087.85	1.42653
1089.78	1.5113
1091.71	1.50528
1093.64	1.45874
1095.56	1.39469
1097.49	1.32012
1099.42	1.23877
1101.35	1.15535
1103.28	1.07153
1105.21	0.989911
1107.14	0.912648
1109.07	0.842616
1111	0.782447
1112.92	0.732128
1114.85	0.691
1116.78	0.658293
1118.71	0.632639
1120.64	0.611573
1122.57	0.592633
1124.5	0.574594
1126.43	0.55663
1128.35	0.538653
1130.28	0.521838
1132.21	0.507005
1134.14	0.494021
1136.07	0.482766
1138	0.473212
1139.93	0.464675
1141.86	0.456587
1143.79	0.449074
1145.71	0.442059
1147.64	0.435303
1149.57	0.428984
1151.5	0.423488
1153.43	0.418846
1155.36	0.414764
1157.29	0.411047
1159.22	0.40745
1161.14	0.403711
1163.07	0.399589
1165	0.395112
1166.93	0.390753
1168.86	0.386721
1170.79	0.38318
1172.72	0.380303
1174.65	0.377821
1176.57	0.375533
1178.5	0.373275
1180.43	0.370741
1182.36	0.367795
1184.29	0.36473
1186.22	0.36196
1188.15	0.359501
1190.08	0.357484
1192.01	0.355983
1193.93	0.354553
1195.86	0.352852
1197.79	0.350878
1199.72	0.348686
1201.65	0.3461
1203.58	0.343232
1205.51	0.340809
1207.44	0.339133
1209.36	0.337947
1211.29	0.337033
1213.22	0.33607
1215.15	0.334835
1217.08	0.333334
1219.01	0.331469
1220.94	0.329337
1222.87	0.327316
1224.8	0.325688
1226.72	0.324653
1228.65	0.324071
1230.58	0.323559
1232.51	0.32294
1234.44	0.322002
1236.37	0.320555
1238.3	0.318747
1240.23	0.316999
1242.15	0.31567
1244.08	0.314737
1246.01	0.314184
1247.94	0.313991
1249.87	0.313859
1251.8	0.313517
1253.73	0.312636
1255.66	0.311229
1257.59	0.309794
1259.51	0.308537
1261.44	0.307529
1263.37	0.306826
1265.3	0.306306
1267.23	0.305921
1269.16	0.305453
1271.09	0.304566
1273.02	0.303198
1274.94	0.301541
1276.87	0.2999
1278.8	0.298529
1280.73	0.297595
1282.66	0.297145
1284.59	0.296942
1286.52	0.296625
1288.45	0.296066
1290.37	0.295186
1292.3	0.293864
1294.23	0.292313
1296.16	0.290905
1298.09	0.289921
1300.02	0.28957
1301.95	0.289697
1303.88	0.289854
1305.81	0.289694
1307.73	0.289164
1309.66	0.288208
1311.59	0.286795
1313.52	0.285473
1315.45	0.284613
1317.38	0.284004
1319.31	0.28386
1321.24	0.284291
1323.16	0.284674
1325.09	0.284507
1327.02	0.283771
1328.95	0.282694
1330.88	0.281489
1332.81	0.280331
1334.74	0.279479
1336.67	0.278884
1338.6	0.278434
1340.52	0.278749
1342.45	0.279622
1344.38	0.279807
1346.31	0.279221
1348.24	0.278344
1350.17	0.277386
1352.1	0.276606
1354.03	0.276193
1355.95	0.276323
1357.88	0.276726
1359.81	0.276607
1361.74	0.275874
1363.67	0.275948
1365.6	0.276506
1367.53	0.275972
1369.46	0.27557
1371.38	0.27564
1373.31	0.275588
1375.24	0.277005
1377.17	0.279449
1379.1	0.281225
1381.03	0.283201
1382.96	0.285618
1384.89	0.285215
1386.82	0.28137
1388.74	0.279267
1390.67	0.279858
1392.6	0.279351
1394.53	0.279249
1396.46	0.281669
1398.39	0.284339
1400.32	0.287919
1402.25	0.292153
1404.17	0.295775
1406.1	0.301705
1408.03	0.309706
1409.96	0.316096
1411.89	0.319084
1413.82	0.31914
1415.75	0.3163
1417.68	0.30976
1419.61	0.303321
1421.53	0.299973
1423.46	0.295592
1425.39	0.291035
1427.32	0.288127
1429.25	0.285287
1431.18	0.284561
1433.11	0.285321
1435.04	0.283624
1436.96	0.28331
1438.89	0.288458
1440.82	0.293881
1442.75	0.299653
1444.68	0.30616
1446.61	0.309649
1448.54	0.311191
1450.47	0.313979
1452.4	0.31933
1454.32	0.323876
1456.25	0.323159
1458.18	0.321588
1460.11	0.322288
1462.04	0.321697
1463.97	0.321108
1465.9	0.320938
1467.83	0.317926
1469.75	0.310709
1471.68	0.301777
1473.61	0.296694
1475.54	0.294925
1477.47	0.293034
1479.4	0.290639
1481.33	0.287892
1483.26	0.285813
1485.18	0.283914
1487.11	0.281351
1489.04	0.279027
1490.97	0.279199
1492.9	0.280717
1494.83	0.278776
1496.76	0.275444
1498.69	0.275272
1500.62	0.276087
1502.54	0.275567
1504.47	0.270313
1506.4	0.263583
1508.33	0.266202
1510.26	0.270417
1512.19	0.271088
1514.12	0.269862
1516.05	0.266905
1517.97	0.2646
1519.9	0.261767
1521.83	0.259898
1523.76	0.262529
1525.69	0.264274
1527.62	0.265208
1529.55	0.26687
1531.48	0.265191
1533.41	0.26217
1535.33	0.262791
1537.26	0.260784
1539.19	0.253902
1541.12	0.253445
1543.05	0.258045
1544.98	0.261354
1546.91	0.263737
1548.84	0.263681
1550.76	0.262407
1552.69	0.260105
1554.62	0.257084
1556.55	0.252415
1558.48	0.245395
1560.41	0.249348
1562.34	0.258122
1564.27	0.260363
1566.19	0.260745
1568.12	0.259431
1570.05	0.257898
1571.98	0.259996
1573.91	0.258875
1575.84	0.255119
1577.77	0.257393
1579.7	0.261001
1581.63	0.261747
1583.55	0.261877
1585.48	0.261923
1587.41	0.261577
1589.34	0.260873
1591.27	0.259998
1593.2	0.259368
1595.13	0.259176
1597.06	0.259678
1598.98	0.260524
1600.91	0.261126
1602.84	0.261632
1604.77	0.261912
1606.7	0.261657
1608.63	0.260954
1610.56	0.260313
1612.49	0.260184
1614.42	0.25827
1616.34	0.255394
1618.27	0.257949
1620.2	0.261223
1622.13	0.260231
1624.06	0.259846
1625.99	0.260986
1627.92	0.260617
1629.85	0.26081
1631.77	0.260886
1633.7	0.256898
1635.63	0.253114
1637.56	0.256498
1639.49	0.260331
1641.42	0.261044
1643.35	0.259956
1645.28	0.255426
1647.2	0.252565
1649.13	0.254757
1651.06	0.2509
1652.99	0.243609
1654.92	0.249556
1656.85	0.256844
1658.78	0.258407
1660.71	0.257332
1662.64	0.255454
1664.56	0.255818
1666.49	0.255466
1668.42	0.251321
1670.35	0.250025
1672.28	0.251745
1674.21	0.25085
1676.14	0.251368
1678.07	0.254009
1679.99	0.254073
1681.92	0.2503
1683.85	0.244767
1685.78	0.246343
1687.71	0.250527
1689.64	0.250805
1691.57	0.252022
1693.5	0.250705
1695.43	0.247251
1697.35	0.247392
1699.28	0.244754
1701.21	0.244863
1703.14	0.249728
1705.07	0.24994
1707	0.250093
1708.93	0.252246
1710.86	0.25294
1712.78	0.252599
1714.71	0.250626
1716.64	0.247884
1718.57	0.248915
1720.5	0.252733
1722.43	0.253752
1724.36	0.253219
1726.29	0.253474
1728.22	0.253026
1730.14	0.252732
1732.07	0.250372
1734	0.247614
1735.93	0.25138
1737.86	0.253573
1739.79	0.251783
1741.72	0.251654
1743.65	0.251857
1745.57	0.25125
1747.5	0.2506
1749.43	0.249175
1751.36	0.249367
1753.29	0.251694
1755.22	0.251682
1757.15	0.250268
1759.08	0.249683
1761	0.247791
1762.93	0.247442
1764.86	0.248831
1766.79	0.248152
1768.72	0.247401
1770.65	0.246151
1772.58	0.244912
1774.51	0.246973
1776.44	0.248545
1778.36	0.247757
1780.29	0.246823
1782.22	0.246684
1784.15	0.246722
1786.08	0.247144
1788.01	0.248001
1789.94	0.246872
1791.87	0.244665
1793.79	0.245205
1795.72	0.246522
1797.65	0.246016
1799.58	0.244865
1801.51	0.24481
1803.44	0.245898
1805.37	0.246833
1807.3	0.247103
1809.23	0.246766
1811.15	0.24647
1813.08	0.246615
1815.01	0.246373
1816.94	0.245834
1818.87	0.245675
1820.8	0.245932
1822.73	0.245552
1824.66	0.244887
1826.58	0.245266
1828.51	0.244842
1830.44	0.244251
1832.37	0.245294
1834.3	0.245672
1836.23	0.245073
1838.16	0.244977
1840.09	0.245212
1842.01	0.244008
1843.94	0.242339
1845.87	0.243601
1847.8	0.24534
1849.73	0.245512
1851.66	0.24544
1853.59	0.245128
1855.52	0.244831
1857.45	0.244789
1859.37	0.244908
1861.3	0.245189
1863.23	0.245438
1865.16	0.245309
1867.09	0.244023
1869.02	0.243003
1870.95	0.243902
1872.88	0.244764
1874.8	0.244728
1876.73	0.244884
1878.66	0.245228
1880.59	0.245582
1882.52	0.24584
1884.45	0.245937
1886.38	0.245789
1888.31	0.244954
1890.24	0.244511
1892.16	0.244933
1894.09	0.244983
1896.02	0.245076
1897.95	0.245613
1899.88	0.245976
1901.81	0.246168
1903.74	0.246275
1905.67	0.246118
1907.59	0.245655
1909.52	0.245287
1911.45	0.245281
1913.38	0.245563
1915.31	0.245453
1917.24	0.244942
1919.17	0.24548
1921.1	0.246255
1923.03	0.246213
1924.95	0.246402
1926.88	0.246425
1928.81	0.245964
1930.74	0.245744
1932.67	0.245736
1934.6	0.245905
1936.53	0.246195
1938.46	0.24637
1940.38	0.246024
1942.31	0.24541
1944.24	0.245386
1946.17	0.245591
1948.1	0.245545
1950.03	0.245537
1951.96	0.245739
1953.89	0.24608
1955.81	0.24645
1957.74	0.246782
1959.67	0.246831
1961.6	0.246681
1963.53	0.246557
1965.46	0.24624
1967.39	0.246106
1969.32	0.246614
1971.25	0.247321
1973.17	0.248088
1975.1	0.24901
1977.03	0.250002
1978.96	0.251331
1980.89	0.253218
1982.82	0.25563
1984.75	0.258018
1986.68	0.259523
1988.6	0.259973
1990.53	0.259686
1992.46	0.259324
1994.39	0.259349
1996.32	0.259466
1998.25	0.25971
2000.18	0.260227
2002.11	0.260607
2004.04	0.260468
2005.96	0.259766
2007.89	0.258833
2009.82	0.258045
2011.75	0.257421
2013.68	0.256723
2015.61	0.255885
2017.54	0.255252
2019.47	0.254883
2021.39	0.254506
2023.32	0.254159
2025.25	0.253926
2027.18	0.25381
2029.11	0.253863
2031.04	0.253989
2032.97	0.253964
2034.9	0.253718
2036.82	0.253426
2038.75	0.253213
2040.68	0.253167
2042.61	0.253438
2044.54	0.253972
2046.47	0.254583
2048.4	0.255007
2050.33	0.255146
2052.26	0.255079
2054.18	0.254723
2056.11	0.254268
2058.04	0.254075
2059.97	0.254175
2061.9	0.254539
2063.83	0.25517
2065.76	0.255986
2067.69	0.256746
2069.61	0.257289
2071.54	0.257794
2073.47	0.258237
2075.4	0.258444
2077.33	0.258478
2079.26	0.258315
2081.19	0.257988
2083.12	0.257754
2085.05	0.257675
2086.97	0.257515
2088.9	0.257162
2090.83	0.256729
2092.76	0.256231
2094.69	0.255668
2096.62	0.255141
2098.55	0.254782
2100.48	0.254712
2102.4	0.254817
2104.33	0.254945
2106.26	0.255057
2108.19	0.255092
2110.12	0.254957
2112.05	0.254576
2113.98	0.254163
2115.91	0.253932
2117.83	0.253874
2119.76	0.254067
2121.69	0.254434
2123.62	0.254801
2125.55	0.255089
2127.48	0.25517
2129.41	0.255027
2131.34	0.254738
2133.27	0.254389
2135.19	0.254155
2137.12	0.254251
2139.05	0.254661
2140.98	0.255129
2142.91	0.255553
2144.84	0.255802
2146.77	0.255679
2148.7	0.255314
2150.62	0.254941
2152.55	0.254641
2154.48	0.254456
2156.41	0.254446
2158.34	0.25454
2160.27	0.254633
2162.2	0.254629
2164.13	0.254405
2166.06	0.254034
2167.98	0.253573
2169.91	0.253002
2171.84	0.252477
2173.77	0.252215
2175.7	0.252387
2177.63	0.252881
2179.56	0.253317
2181.49	0.253527
2183.41	0.253512
2185.34	0.253224
2187.27	0.252745
2189.2	0.252278
2191.13	0.251999
2193.06	0.251998
2194.99	0.252197
2196.92	0.252534
2198.85	0.252867
2200.77	0.252987
2202.7	0.25291
2204.63	0.252548
2206.56	0.251928
2208.49	0.251472
2210.42	0.251337
2212.35	0.251377
2214.28	0.251572
2216.2	0.251897
2218.13	0.25214
2220.06	0.252119
2221.99	0.251853
2223.92	0.251498
2225.85	0.251178
2227.78	0.250958
2229.71	0.250933
2231.63	0.251126
2233.56	0.251475
2235.49	0.25181
2237.42	0.251951
2239.35	0.251937
2241.28	0.251759
2243.21	0.251384
2245.14	0.250998
2247.07	0.250837
2248.99	0.250986
2250.92	0.251269
2252.85	0.251549
2254.78	0.25184
2256.71	0.252033
2258.64	0.25199
2260.57	0.25173
2262.5	0.251407
2264.42	0.251195
2266.35	0.251157
2268.28	0.251304
2270.21	0.25162
2272.14	0.251982
2274.07	0.252265
2276	0.252375
2277.93	0.252309
2279.86	0.252174
2281.78	0.251987
2283.71	0.251817
2285.64	0.25177
2287.57	0.251838
2289.5	0.252061
2291.43	0.252319
2293.36	0.252393
2295.29	0.252237
2297.21	0.251882
2299.14	0.25148
2301.07	0.251122
2303	0.250742
2304.93	0.250405
2306.86	0.250151
2308.79	0.249896
2310.72	0.249535
2312.64	0.248947
2314.57	0.248169
2316.5	0.24722
2318.43	0.246084
2320.36	0.244925
2322.29	0.243974
2324.22	0.24346
2326.15	0.243155
2328.08	0.242673
2330	0.242153
2331.93	0.241801
2333.86	0.241543
2335.79	0.241156
2337.72	0.240673
2339.65	0.240435
2341.58	0.240692
2343.51	0.241427
2345.43	0.243221
2347.36	0.246221
2349.29	0.247571
2351.22	0.245413
2353.15	0.241934
2355.08	0.239396
2357.01	0.237718
2358.94	0.236797
2360.87	0.236609
2362.79	0.237126
2364.72	0.238186
2366.65	0.239486
2368.58	0.240971
2370.51	0.242563
2372.44	0.244289
2374.37	0.246239
2376.3	0.248305
2378.22	0.25024
2380.15	0.251884
2382.08	0.253195
2384.01	0.254162
2385.94	0.254774
2387.87	0.255058
2389.8	0.255118
2391.73	0.254974
2393.66	0.254737
2395.58	0.25462
2397.51	0.25463
2399.44	0.254769
2401.37	0.255063
2403.3	0.255374
2405.23	0.255539
2407.16	0.25555
2409.09	0.255475
2411.01	0.255301
2412.94	0.255161
2414.87	0.255188
2416.8	0.255277
2418.73	0.25545
2420.66	0.255712
2422.59	0.255925
2424.52	0.256017
2426.44	0.255928
2428.37	0.255734
2430.3	0.25559
2432.23	0.25553
2434.16	0.255564
2436.09	0.255716
2438.02	0.255968
2439.95	0.25622
2441.88	0.256415
2443.8	0.256481
2445.73	0.256337
2447.66	0.256155
2449.59	0.256047
2451.52	0.256045
2453.45	0.256231
2455.38	0.256488
2457.31	0.256813
2459.23	0.257176
2461.16	0.257302
2463.09	0.257271
2465.02	0.257266
2466.95	0.257193
2468.88	0.257056
2470.81	0.25705
2472.74	0.257238
2474.67	0.257426
2476.59	0.257569
2478.52	0.257727
2480.45	0.257794
2482.38	0.257755
2484.31	0.257642
2486.24	0.2575
2488.17	0.257479
2490.1	0.257611
2492.02	0.257845
2493.95	0.258131
2495.88	0.258364
2497.81	0.258447
2499.74	0.258428
2501.67	0.2584
2503.6	0.258359
2505.53	0.258343
2507.45	0.258379
2509.38	0.258449
2511.31	0.258572
2513.24	0.258707
2515.17	0.258851
2517.1	0.258969
2519.03	0.258952
2520.96	0.258869
2522.89	0.258829
2524.81	0.258816
2526.74	0.258834
2528.67	0.258909
2530.6	0.259013
2532.53	0.25909
2534.46	0.259143
2536.39	0.259188
2538.32	0.259202
2540.24	0.259154
2542.17	0.259072
2544.1	0.259027
2546.03	0.25905
2547.96	0.259167
2549.89	0.259355
2551.82	0.259508
2553.75	0.259581
2555.68	0.259628
2557.6	0.259628
2559.53	0.259574
2561.46	0.259555
2563.39	0.259581
2565.32	0.259658
2567.25	0.259822
2569.18	0.260004
2571.11	0.260176
2573.03	0.260332
2574.96	0.260413
2576.89	0.260411
2578.82	0.260333
2580.75	0.260257
2582.68	0.260289
2584.61	0.260372
2586.54	0.260418
2588.46	0.26055
2590.39	0.260783
2592.32	0.260956
2594.25	0.261096
2596.18	0.261141
2598.11	0.261012
2600.04	0.26086
2601.97	0.260714
2603.9	0.260704
2605.82	0.26092
2607.75	0.261123
2609.68	0.261303
2611.61	0.261525
2613.54	0.261638
2615.47	0.261609
2617.4	0.261512
2619.33	0.261369
2621.25	0.26125
2623.18	0.261293
2625.11	0.261489
2627.04	0.261777
2628.97	0.262135
2630.9	0.262418
2632.83	0.262475
2634.76	0.262302
2636.69	0.262054
2638.61	0.261917
2640.54	0.261868
2642.47	0.261971
2644.4	0.262352
2646.33	0.262738
2648.26	0.262947
2650.19	0.263075
2652.12	0.263027
2654.04	0.262854
2655.97	0.262726
2657.9	0.262612
2659.83	0.26261
2661.76	0.262838
2663.69	0.263249
2665.62	0.263687
2667.55	0.263968
2669.48	0.264018
2671.4	0.263764
2673.33	0.263433
2675.26	0.26333
2677.19	0.263356
2679.12	0.263517
2681.05	0.263867
2682.98	0.264221
2684.91	0.264477
2686.83	0.264632
2688.76	0.264673
2690.69	0.264528
2692.62	0.264233
2694.55	0.264036
2696.48	0.264075
2698.41	0.264315
2700.34	0.264705
2702.26	0.265086
2704.19	0.265291
2706.12	0.265339
2708.05	0.265246
2709.98	0.265047
2711.91	0.264849
2713.84	0.264718
2715.77	0.264848
2717.7	0.265226
2719.62	0.265545
2721.55	0.26578
2723.48	0.26598
2725.41	0.265992
2727.34	0.265826
2729.27	0.265692
2731.2	0.265554
2733.13	0.265409
2735.05	0.265586
2736.98	0.266026
2738.91	0.26641
2740.84	0.266655
2742.77	0.266692
2744.7	0.266571
2746.63	0.26637
2748.56	0.266189
2750.49	0.266215
2752.41	0.266375
2754.34	0.26656
2756.27	0.266853
2758.2	0.267264
2760.13	0.26758
2762.06	0.267606
2763.99	0.267444
2765.92	0.267265
2767.84	0.267187
2769.77	0.267237
2771.7	0.267362
2773.63	0.267628
2775.56	0.267952
2777.49	0.268226
2779.42	0.268464
2781.35	0.268478
2783.27	0.268267
2785.2	0.268091
2787.13	0.26803
2789.06	0.26817
2790.99	0.268494
2792.92	0.268802
2794.85	0.269046
2796.78	0.269253
2798.71	0.269432
2800.63	0.269561
2802.56	0.269571
2804.49	0.269517
2806.42	0.269523
2808.35	0.269647
2810.28	0.269882
2812.21	0.270173
2814.14	0.270458
2816.06	0.270666
2817.99	0.270775
2819.92	0.270886
2821.85	0.271013
2823.78	0.271075
2825.71	0.271229
2827.64	0.271584
2829.57	0.271971
2831.5	0.272359
2833.42	0.272772
2835.35	0.27317
2837.28	0.273684
2839.21	0.274439
2841.14	0.275415
2843.07	0.276683
2845	0.278427
2846.93	0.280714
2848.85	0.28296
2850.78	0.284033
2852.71	0.28374
2854.64	0.282923
2856.57	0.282069
2858.5	0.28123
2860.43	0.280444
2862.36	0.279857
2864.29	0.279525
2866.21	0.279361
2868.14	0.279363
2870.07	0.279423
2872	0.279516
2873.93	0.279692
2875.86	0.279733
2877.79	0.279534
2879.72	0.279257
2881.64	0.279101
2883.57	0.279139
2885.5	0.279405
2887.43	0.279873
2889.36	0.28039
2891.29	0.280913
2893.22	0.281378
2895.15	0.281758
2897.07	0.282166
2899	0.282616
2900.93	0.283138
2902.86	0.283707
2904.79	0.284336
2906.72	0.285283
2908.65	0.28662
2910.58	0.28832
2912.51	0.290511
2914.43	0.292885
2916.36	0.294701
2918.29	0.295721
2920.22	0.296066
2922.15	0.295833
2924.08	0.295356
2926.01	0.294812
2927.94	0.294132
2929.86	0.293267
2931.79	0.292217
2933.72	0.291033
2935.65	0.289754
2937.58	0.288675
2939.51	0.287895
2941.44	0.287178
2943.37	0.286727
2945.3	0.286682
2947.22	0.286763
2949.15	0.286796
2951.08	0.286834
2953.01	0.286983
2954.94	0.287112
2956.87	0.287088
2958.8	0.286944
2960.73	0.286728
2962.65	0.28653
2964.58	0.286222
2966.51	0.285628
2968.44	0.284842
2970.37	0.283918
2972.3	0.282959
2974.23	0.282222
2976.16	0.281705
2978.08	0.281248
2980.01	0.280908
2981.94	0.280817
2983.87	0.280748
2985.8	0.280434
2987.73	0.280134
2989.66	0.279806
2991.59	0.279237
2993.52	0.27889
2995.44	0.278866
2997.37	0.278834
2999.3	0.2788
3001.23	0.278836
3003.16	0.278898
3005.09	0.278883
3007.02	0.278765
3008.95	0.278531
3010.87	0.278265
3012.8	0.278123
3014.73	0.278142
3016.66	0.278352
3018.59	0.278601
3020.52	0.278818
3022.45	0.278992
3024.38	0.278987
3026.31	0.27891
3028.23	0.278748
3030.16	0.278527
3032.09	0.278484
3034.02	0.278629
3035.95	0.278894
3037.88	0.279112
3039.81	0.279219
3041.74	0.279333
3043.66	0.27943
3045.59	0.279444
3047.52	0.279357
3049.45	0.279277
3051.38	0.279321
3053.31	0.279466
3055.24	0.279706
3057.17	0.280016
3059.09	0.280245
3061.02	0.280266
3062.95	0.280149
3064.88	0.280011
3066.81	0.279988
3068.74	0.280151
3070.67	0.280346
3072.6	0.280483
3074.53	0.280539
3076.45	0.280575
3078.38	0.280778
3080.31	0.280924
3082.24	0.280829
3084.17	0.280827
3086.1	0.280951
3088.03	0.281009
3089.96	0.281104
3091.88	0.2813
3093.81	0.281549
3095.74	0.281725
3097.67	0.281729
3099.6	0.281669
3101.53	0.281632
3103.46	0.281664
3105.39	0.281702
3107.32	0.281748
3109.24	0.281975
3111.17	0.282209
3113.1	0.282314
3115.03	0.282421
3116.96	0.282498
3118.89	0.282603
3120.82	0.282778
3122.75	0.282893
3124.67	0.282923
3126.6	0.282965
3128.53	0.283165
3130.46	0.283451
3132.39	0.283692
3134.32	0.283957
3136.25	0.284095
3138.18	0.28404
3140.11	0.284102
3142.03	0.284232
3143.96	0.284222
3145.89	0.284259
3147.82	0.284446
3149.75	0.284688
3151.68	0.284954
3153.61	0.285254
3155.54	0.285485
3157.46	0.285488
3159.39	0.285453
3161.32	0.285554
3163.25	0.285607
3165.18	0.285661
3167.11	0.285929
3169.04	0.286342
3170.97	0.28666
3172.89	0.286754
3174.82	0.286786
3176.75	0.28688
3178.68	0.286888
3180.61	0.286846
3182.54	0.28697
3184.47	0.287175
3186.4	0.28735
3188.33	0.287602
3190.25	0.287915
3192.18	0.288151
3194.11	0.288198
3196.04	0.288101
3197.97	0.288061
3199.9	0.288183
3201.83	0.28846
3203.76	0.288843
3205.68	0.289169
3207.61	0.289368
3209.54	0.289615
3211.47	0.289774
3213.4	0.289698
3215.33	0.289693
3217.26	0.289698
3219.19	0.289687
3221.12	0.28997
3223.04	0.290322
3224.97	0.290617
3226.9	0.291044
3228.83	0.291297
3230.76	0.291186
3232.69	0.291099
3234.62	0.291229
3236.55	0.291449
3238.47	0.291652
3240.4	0.29186
3242.33	0.292167
3244.26	0.2924
3246.19	0.292602
3248.12	0.292967
3250.05	0.293136
3251.98	0.293047
3253.9	0.293057
3255.83	0.293155
3257.76	0.293361
3259.69	0.293746
3261.62	0.294043
3263.55	0.294205
3265.48	0.294373
3267.41	0.294354
3269.34	0.29427
3271.26	0.294397
3273.19	0.294504
3275.12	0.29466
3277.05	0.294976
3278.98	0.295159
3280.91	0.295322
3282.84	0.295599
3284.77	0.295822
3286.69	0.295944
3288.62	0.295862
3290.55	0.295683
3292.48	0.295733
3294.41	0.295989
3296.34	0.296354
3298.27	0.296838
3300.2	0.297162
3302.13	0.297069
3304.05	0.296935
3305.98	0.297129
3307.91	0.297399
3309.84	0.297601
3311.77	0.297832
3313.7	0.298078
3315.63	0.298318
3317.56	0.298496
3319.48	0.298729
3321.41	0.299067
3323.34	0.299172
3325.27	0.299105
3327.2	0.299302
3329.13	0.299653
3331.06	0.299896
3332.99	0.300129
3334.92	0.300404
3336.84	0.300779
3338.77	0.301172
3340.7	0.301346
3342.63	0.301507
3344.56	0.301715
3346.49	0.301772
3348.42	0.301936
3350.35	0.302343
3352.27	0.302735
3354.2	0.303023
3356.13	0.30331
3358.06	0.303527
3359.99	0.303584
3361.92	0.303695
3363.85	0.303878
3365.78	0.303981
3367.7	0.304193
3369.63	0.304565
3371.56	0.304945
3373.49	0.305314
3375.42	0.30553
3377.35	0.305631
3379.28	0.305849
3381.21	0.306045
3383.14	0.306162
3385.06	0.306318
3386.99	0.306494
3388.92	0.306729
3390.85	0.306956
3392.78	0.30722
3394.71	0.307523
3396.64	0.307548
3398.57	0.307515
3400.49	0.307783
3402.42	0.308091
3404.35	0.308343
3406.28	0.30863
3408.21	0.308776
3410.14	0.308841
3412.07	0.309065
3414	0.30932
3415.93	0.309438
3417.85	0.309501
3419.78	0.30952
3421.71	0.309532
3423.64	0.309683
3425.57	0.309926
3427.5	0.310125
3429.43	0.310276
3431.36	0.31035
3433.28	0.310344
3435.21	0.310303
3437.14	0.310301
3439.07	0.310413
3441	0.310543
3442.93	0.310627
3444.86	0.310599
3446.79	0.310464
3448.71	0.310522
3450.64	0.310652
3452.57	0.310541
3454.5	0.310374
3456.43	0.310357
3458.36	0.310431
3460.29	0.310412
3462.22	0.310315
3464.15	0.310241
3466.07	0.310152
3468	0.310163
3469.93	0.31021
3471.86	0.310085
3473.79	0.309875
3475.72	0.309779
3477.65	0.309863
3479.58	0.309854
3481.5	0.309735
3483.43	0.309795
3485.36	0.309775
3487.29	0.309656
3489.22	0.309738
3491.15	0.309668
3493.08	0.3094
3495.01	0.309325
3496.94	0.309333
3498.86	0.309265
3500.79	0.30903
3502.72	0.308725
3504.65	0.308712
3506.58	0.308691
3508.51	0.30836
3510.44	0.30815
3512.37	0.308242
3514.29	0.308322
3516.22	0.308186
3518.15	0.308046
3520.08	0.307887
3522.01	0.307439
3523.94	0.307091
3525.87	0.307063
3527.8	0.307079
3529.72	0.30734
3531.65	0.307953
3533.58	0.30854
3535.51	0.309034
3537.44	0.30975
3539.37	0.310742
3541.3	0.311728
3543.23	0.31188
3545.16	0.310739
3547.08	0.309683
3549.01	0.309236
3550.94	0.308404
3552.87	0.307899
3554.8	0.308508
3556.73	0.309616
3558.66	0.311381
3560.59	0.314965
3562.51	0.321379
3564.44	0.330693
3566.37	0.345442
3568.3	0.37071
3570.23	0.399595
3572.16	0.410772
3574.09	0.393142
3576.02	0.362845
3577.95	0.33855
3579.87	0.323231
3581.8	0.314175
3583.73	0.308604
3585.66	0.30374
3587.59	0.30016
3589.52	0.299859
3591.45	0.300128
3593.38	0.298909
3595.3	0.298141
3597.23	0.298281
3599.16	0.297953
3601.09	0.297536
3603.02	0.297763
3604.95	0.297517
3606.88	0.295786
3608.81	0.29445
3610.74	0.294589
3612.66	0.294435
3614.59	0.294699
3616.52	0.294641
3618.45	0.29298
3620.38	0.293186
3622.31	0.295043
3624.24	0.295746
3626.17	0.293809
3628.09	0.28959
3630.02	0.2898
3631.95	0.293617
3633.88	0.294828
3635.81	0.295233
3637.74	0.295935
3639.67	0.295972
3641.6	0.295961
3643.52	0.295842
3645.45	0.294139
3647.38	0.290341
3649.31	0.287607
3651.24	0.290058
3653.17	0.293531
3655.1	0.293201
3657.03	0.292847
3658.96	0.294693
3660.88	0.295399
3662.81	0.29501
3664.74	0.294747
3666.67	0.29369
3668.6	0.290318
3670.53	0.288596
3672.46	0.289906
3674.39	0.287759
3676.31	0.286749
3678.24	0.290839
3680.17	0.293003
3682.1	0.293526
3684.03	0.293886
3685.96	0.29212
3687.89	0.288875
3689.82	0.288251
3691.75	0.290991
3693.67	0.293337
3695.6	0.294172
3697.53	0.294385
3699.46	0.293802
3701.39	0.292688
3703.32	0.293217
3705.25	0.294286
3707.18	0.293447
3709.1	0.291309
3711.03	0.289414
3712.96	0.290711
3714.89	0.29378
3716.82	0.294685
3718.75	0.294112
3720.68	0.293401
3722.61	0.293055
3724.53	0.292623
3726.46	0.292578
3728.39	0.293516
3730.32	0.292818
3732.25	0.290414
3734.18	0.288927
3736.11	0.28907
3738.04	0.291145
3739.97	0.293425
3741.89	0.291564
3743.82	0.286809
3745.75	0.287809
3747.68	0.290335
3749.61	0.287988
3751.54	0.287822
3753.47	0.291911
3755.4	0.29466
3757.32	0.29487
3759.25	0.294274
3761.18	0.295561
3763.11	0.296418
3765.04	0.295647
3766.97	0.295412
3768.9	0.294995
3770.83	0.295373
3772.76	0.297065
3774.68	0.297806
3776.61	0.297309
3778.54	0.296261
3780.47	0.29642
3782.4	0.297494
3784.33	0.297425
3786.26	0.297536
3788.19	0.298294
3790.11	0.298394
3792.04	0.298506
3793.97	0.297704
3795.9	0.296199
3797.83	0.2963
3799.76	0.294622
3801.69	0.292814
3803.62	0.295336
3805.55	0.295509
3807.47	0.294719
3809.4	0.297242
3811.33	0.298722
3813.26	0.297355
3815.19	0.29438
3817.12	0.294309
3819.05	0.294884
3820.98	0.29301
3822.9	0.29508
3824.83	0.297706
3826.76	0.297423
3828.69	0.297714
3830.62	0.297203
3832.55	0.296174
3834.48	0.295634
3836.41	0.293835
3838.33	0.293216
3840.26	0.295176
3842.19	0.296509
3844.12	0.297422
3846.05	0.298782
3847.98	0.299111
3849.91	0.297159
3851.84	0.291745
3853.77	0.287976
3855.69	0.293271
3857.62	0.298247
3859.55	0.298771
3861.48	0.298014
3863.41	0.296671
3865.34	0.296787
3867.27	0.297411
3869.2	0.295744
3871.12	0.29604
3873.05	0.297951
3874.98	0.298804
3876.91	0.30014
3878.84	0.299396
3880.77	0.298193
3882.7	0.299079
3884.63	0.298135
3886.56	0.297997
3888.48	0.299681
3890.41	0.298915
3892.34	0.298679
3894.27	0.300585
3896.2	0.30087
3898.13	0.299132
3900.06	0.297594
3901.99	0.297097
3903.91	0.29733
3905.84	0.299053
3907.77	0.301166
3909.7	0.301854
3911.63	0.302024
3913.56	0.302125
3915.49	0.301362
3917.42	0.300455
3919.34	0.300721
3921.27	0.301463
3923.2	0.301419
3925.13	0.301434
3927.06	0.302144
3928.99	0.302342
3930.92	0.301761
3932.85	0.301651
3934.78	0.302231
3936.7	0.302651
3938.63	0.30288
3940.56	0.302629
3942.49	0.302014
3944.42	0.302311
3946.35	0.302846
3948.28	0.302658
3950.21	0.302686
3952.13	0.303135
3954.06	0.303425
3955.99	0.303491
3957.92	0.303475
3959.85	0.303463
3961.78	0.303494
3963.71	0.303642
3965.64	0.303775
3967.57	0.303921
3969.49	0.304218
3971.42	0.304295
3973.35	0.304111
3975.28	0.304117
3977.21	0.304359
3979.14	0.304513
3981.07	0.304357
3983	0.304312
3984.92	0.304725
3986.85	0.305013
3988.78	0.304934
3990.71	0.304968
3992.64	0.305128
3994.57	0.305128
3996.5	0.305038
3998.43	0.305028
4000.35	0.305156

## Sheet: Sheet3
Wavenumber	Silicone
399.264	0.284039
401.193	0.279051
403.122	0.275339
405.05	0.271728
406.979	0.268068
408.908	0.26608
410.837	0.264763
412.766	0.262125
414.694	0.259667
416.623	0.253845
418.552	0.246869
420.481	0.247036
422.41	0.247595
424.339	0.245458
426.267	0.244322
428.196	0.24289
430.125	0.240555
432.054	0.237894
433.983	0.236413
435.911	0.235996
437.84	0.235136
439.769	0.23425
441.698	0.231805
443.627	0.229348
445.555	0.229073
447.484	0.22832
449.413	0.22767
451.342	0.227927
453.271	0.228265
455.2	0.229109
457.128	0.231048
459.057	0.235157
460.986	0.239021
462.915	0.241305
464.844	0.243134
466.772	0.244785
468.701	0.248778
470.63	0.255374
472.559	0.260778
474.488	0.261037
476.416	0.255481
478.345	0.247604
480.274	0.240301
482.203	0.234488
484.132	0.230745
486.06	0.228563
487.989	0.227374
489.918	0.226171
491.847	0.224308
493.776	0.223398
495.705	0.22352
497.633	0.223079
499.562	0.222374
501.491	0.222791
503.42	0.224958
505.349	0.227722
507.277	0.229917
509.206	0.231828
511.135	0.233649
513.064	0.235113
514.993	0.236333
516.921	0.237944
518.85	0.240987
520.779	0.246135
522.708	0.252026
524.637	0.256652
526.566	0.260951
528.494	0.266532
530.423	0.272818
532.352	0.279602
534.281	0.287843
536.21	0.297781
538.138	0.309076
540.067	0.321831
541.996	0.335794
543.925	0.349853
545.854	0.363474
547.782	0.378199
549.711	0.397335
551.64	0.422605
553.569	0.454533
555.498	0.495296
557.427	0.548292
559.355	0.615576
561.284	0.695829
563.213	0.78564
565.142	0.878833
567.071	0.963095
568.999	1.02265
570.928	1.04779
572.857	1.03494
574.786	0.978994
576.715	0.880564
578.643	0.76117
580.572	0.648674
582.501	0.559996
584.43	0.500182
586.359	0.464093
588.287	0.442029
590.216	0.432889
592.145	0.447048
594.074	0.493737
596.003	0.584475
597.932	0.726609
599.86	0.887441
601.789	0.989106
603.718	0.972166
605.647	0.849527
607.576	0.699646
609.504	0.581618
611.433	0.505689
613.362	0.460337
615.291	0.434037
617.22	0.420705
619.148	0.419267
621.077	0.432764
623.006	0.462971
624.935	0.509793
626.864	0.568491
628.793	0.623513
630.721	0.65767
632.65	0.664518
634.579	0.64658
636.508	0.610673
638.437	0.566785
640.365	0.521294
642.294	0.477981
644.223	0.439616
646.152	0.407291
648.081	0.38071
650.009	0.359691
651.938	0.343663
653.867	0.330774
655.796	0.320314
657.725	0.311928
659.654	0.304843
661.582	0.298262
663.511	0.292964
665.44	0.286347
667.369	0.2769
669.298	0.274381
671.226	0.276239
673.155	0.273769
675.084	0.269815
677.013	0.266182
678.942	0.262059
680.87	0.257893
682.799	0.254018
684.728	0.251345
686.657	0.249429
688.586	0.248004
690.515	0.247193
692.443	0.246428
694.372	0.245457
696.301	0.244117
698.23	0.242219
700.159	0.239888
702.087	0.23801
704.016	0.23683
705.945	0.23606
707.874	0.235984
709.803	0.236155
711.731	0.23584
713.66	0.234967
715.589	0.233532
717.518	0.231399
719.447	0.228838
721.375	0.226711
723.304	0.225281
725.233	0.224485
727.162	0.22448
729.091	0.224487
731.02	0.223861
732.948	0.222633
734.877	0.220606
736.806	0.218297
738.735	0.216459
740.664	0.21558
742.592	0.215909
744.521	0.216797
746.45	0.217768
748.379	0.218448
750.308	0.218223
752.236	0.217115
754.165	0.215472
756.094	0.213908
758.023	0.213087
759.952	0.213116
761.881	0.213825
763.809	0.214879
765.738	0.215604
767.667	0.215572
769.596	0.214795
771.525	0.21321
773.453	0.211257
775.382	0.209987
777.311	0.210012
779.24	0.211128
781.169	0.212622
783.097	0.213907
785.026	0.214651
786.955	0.214584
788.884	0.213699
790.813	0.212409
792.742	0.2115
794.67	0.211622
796.599	0.212856
798.528	0.214742
800.457	0.21662
802.386	0.218065
804.314	0.218438
806.243	0.217504
808.172	0.21611
810.101	0.214953
812.03	0.214657
813.958	0.215643
815.887	0.217469
817.816	0.219393
819.745	0.220875
821.674	0.221837
823.602	0.222183
825.531	0.221867
827.46	0.221456
829.389	0.221553
831.318	0.222377
833.247	0.224015
835.175	0.226426
837.104	0.228827
839.033	0.23044
840.962	0.231347
842.891	0.231762
844.819	0.232066
846.748	0.232766
848.677	0.234009
850.606	0.23591
852.535	0.238351
854.463	0.240841
856.392	0.243111
858.321	0.244944
860.25	0.246477
862.179	0.247991
864.108	0.249573
866.036	0.252296
867.965	0.25635
869.894	0.26186
871.823	0.268823
873.752	0.272281
875.68	0.270963
877.609	0.271427
879.538	0.273551
881.467	0.271615
883.396	0.267652
885.324	0.267021
887.253	0.269227
889.182	0.271955
891.111	0.27493
893.04	0.277795
894.969	0.280147
896.897	0.282076
898.826	0.283691
900.755	0.285276
902.684	0.287234
904.613	0.289814
906.541	0.293062
908.47	0.296832
910.399	0.300748
912.328	0.304346
914.257	0.307599
916.185	0.310756
918.114	0.313942
920.043	0.317331
921.972	0.321012
923.901	0.325131
925.83	0.329726
927.758	0.334478
929.687	0.339159
931.616	0.343729
933.545	0.348032
935.474	0.351885
937.402	0.356173
939.331	0.361462
941.26	0.367771
943.189	0.375325
945.118	0.383031
947.046	0.389845
948.975	0.396197
950.904	0.403603
952.833	0.411731
954.762	0.422441
956.69	0.43989
958.619	0.468438
960.548	0.518447
962.477	0.55512
964.406	0.515649
966.335	0.453412
968.263	0.429154
970.192	0.429411
972.121	0.4355
974.05	0.443709
975.979	0.452886
977.907	0.464148
979.836	0.476411
981.765	0.488712
983.694	0.499404
985.623	0.507873
987.551	0.51626
989.48	0.526015
991.409	0.537482
993.338	0.550504
995.267	0.565425
997.196	0.582384
999.124	0.601566
1001.05	0.623071
1002.98	0.646799
1004.91	0.673616
1006.84	0.704219
1008.77	0.739473
1010.7	0.77971
1012.63	0.824908
1014.55	0.877091
1016.48	0.938397
1018.41	1.00702
1020.34	1.0837
1022.27	1.1782
1024.2	1.29585
1026.13	1.41747
1028.06	1.52545
1029.99	1.64251
1031.91	1.77964
1033.84	1.88649
1035.77	1.93221
1037.7	1.9647
1039.63	2.02124
1041.56	2.08019
1043.49	2.11463
1045.42	2.12983
1047.34	2.12615
1049.27	2.10496
1051.2	2.07513
1053.13	2.04493
1055.06	2.01761
1056.99	1.98917
1058.92	1.95912
1060.85	1.92536
1062.78	1.87678
1064.7	1.81527
1066.63	1.74649
1068.56	1.67009
1070.49	1.5907
1072.42	1.50721
1074.35	1.41182
1076.28	1.29514
1078.21	1.16926
1080.13	1.06904
1082.06	1.03209
1083.99	1.09116
1085.92	1.24809
1087.85	1.42653
1089.78	1.5113
1091.71	1.50528
1093.64	1.45874
1095.56	1.39469
1097.49	1.32012
1099.42	1.23877
1101.35	1.15535
1103.28	1.07153
1105.21	0.989911
1107.14	0.912648
1109.07	0.842616
1111	0.782447
1112.92	0.732128
1114.85	0.691
1116.78	0.658293
1118.71	0.632639
1120.64	0.611573
1122.57	0.592633
1124.5	0.574594
1126.43	0.55663
1128.35	0.538653
1130.28	0.521838
1132.21	0.507005
1134.14	0.494021
1136.07	0.482766
1138	0.473212
1139.93	0.464675
1141.86	0.456587
1143.79	0.449074
1145.71	0.442059
1147.64	0.435303
1149.57	0.428984
1151.5	0.423488
1153.43	0.418846
1155.36	0.414764
1157.29	0.411047
1159.22	0.40745
1161.14	0.403711
1163.07	0.399589
1165	0.395112
1166.93	0.390753
1168.86	0.386721
1170.79	0.38318
1172.72	0.380303
1174.65	0.377821
1176.57	0.375533
1178.5	0.373275
1180.43	0.370741
1182.36	0.367795
1184.29	0.36473
1186.22	0.36196
1188.15	0.359501
1190.08	0.357484
1192.01	0.355983
1193.93	0.354553
1195.86	0.352852
1197.79	0.350878
1199.72	0.348686
1201.65	0.3461
1203.58	0.343232
1205.51	0.340809
1207.44	0.339133
1209.36	0.337947
1211.29	0.337033
1213.22	0.33607
1215.15	0.334835
1217.08	0.333334
1219.01	0.331469
1220.94	0.329337
1222.87	0.327316
1224.8	0.325688
1226.72	0.324653
1228.65	0.324071
1230.58	0.323559
1232.51	0.32294
1234.44	0.322002
1236.37	0.320555
1238.3	0.318747
1240.23	0.316999
1242.15	0.31567
1244.08	0.314737
1246.01	0.314184
1247.94	0.313991
1249.87	0.313859
1251.8	0.313517
1253.73	0.312636
1255.66	0.311229
1257.59	0.309794
1259.51	0.308537
1261.44	0.307529
1263.37	0.306826
1265.3	0.306306
1267.23	0.305921
1269.16	0.305453
1271.09	0.304566
1273.02	0.303198
1274.94	0.301541
1276.87	0.2999
1278.8	0.298529
1280.73	0.297595
1282.66	0.297145
1284.59	0.296942
1286.52	0.296625
1288.45	0.296066
1290.37	0.295186
1292.3	0.293864
1294.23	0.292313
1296.16	0.290905
1298.09	0.289921
1300.02	0.28957
1301.95	0.289697
1303.88	0.289854
1305.81	0.289694
1307.73	0.289164
1309.66	0.288208
1311.59	0.286795
1313.52	0.285473
1315.45	0.284613
1317.38	0.284004
1319.31	0.28386
1321.24	0.284291
1323.16	0.284674
1325.09	0.284507
1327.02	0.283771
1328.95	0.282694
1330.88	0.281489
1332.81	0.280331
1334.74	0.279479
1336.67	0.278884
1338.6	0.278434
1340.52	0.278749
1342.45	0.279622
1344.38	0.279807
1346.31	0.279221
1348.24	0.278344
1350.17	0.277386
1352.1	0.276606
1354.03	0.276193
1355.95	0.276323
1357.88	0.276726
1359.81	0.276607
1361.74	0.275874
1363.67	0.275948
1365.6	0.276506
1367.53	0.275972
1369.46	0.27557
1371.38	0.27564
1373.31	0.275588
1375.24	0.277005
1377.17	0.279449
1379.1	0.281225
1381.03	0.283201
1382.96	0.285618
1384.89	0.285215
1386.82	0.28137
1388.74	0.279267
1390.67	0.279858
1392.6	0.279351
1394.53	0.279249
1396.46	0.281669
1398.39	0.284339
1400.32	0.287919
1402.25	0.292153
1404.17	0.295775
1406.1	0.301705
1408.03	0.309706
1409.96	0.316096
1411.89	0.319084
1413.82	0.31914
1415.75	0.3163
1417.68	0.30976
1419.61	0.303321
1421.53	0.299973
1423.46	0.295592
1425.39	0.291035
1427.32	0.288127
1429.25	0.285287
1431.18	0.284561
1433.11	0.285321
1435.04	0.283624
1436.96	0.28331
1438.89	0.288458
1440.82	0.293881
1442.75	0.299653
1444.68	0.30616
1446.61	0.309649
1448.54	0.311191
1450.47	0.313979
1452.4	0.31933
1454.32	0.323876
1456.25	0.323159
1458.18	0.321588
1460.11	0.322288
1462.04	0.321697
1463.97	0.321108
1465.9	0.320938
1467.83	0.317926
1469.75	0.310709
1471.68	0.301777
1473.61	0.296694
1475.54	0.294925
1477.47	0.293034
1479.4	0.290639
1481.33	0.287892
1483.26	0.285813
1485.18	0.283914
1487.11	0.281351
1489.04	0.279027
1490.97	0.279199
1492.9	0.280717
1494.83	0.278776
1496.76	0.275444
1498.69	0.275272
1500.62	0.276087
1502.54	0.275567
1504.47	0.270313
1506.4	0.263583
1508.33	0.266202
1510.26	0.270417
1512.19	0.271088
1514.12	0.269862
1516.05	0.266905
1517.97	0.2646
1519.9	0.261767
1521.83	0.259898
1523.76	0.262529
1525.69	0.264274
1527.62	0.265208
1529.55	0.26687
1531.48	0.265191
1533.41	0.26217
1535.33	0.262791
1537.26	0.260784
1539.19	0.253902
1541.12	0.253445
1543.05	0.258045
1544.98	0.261354
1546.91	0.263737
1548.84	0.263681
1550.76	0.262407
1552.69	0.260105
1554.62	0.257084
1556.55	0.252415
1558.48	0.245395
1560.41	0.249348
1562.34	0.258122
1564.27	0.260363
1566.19	0.260745
1568.12	0.259431
1570.05	0.257898
1571.98	0.259996
1573.91	0.258875
1575.84	0.255119
1577.77	0.257393
1579.7	0.261001
1581.63	0.261747
1583.55	0.261877
1585.48	0.261923
1587.41	0.261577
1589.34	0.260873
1591.27	0.259998
1593.2	0.259368
1595.13	0.259176
1597.06	0.259678
1598.98	0.260524
1600.91	0.261126
1602.84	0.261632
1604.77	0.261912
1606.7	0.261657
1608.63	0.260954
1610.56	0.260313
1612.49	0.260184
1614.42	0.25827
1616.34	0.255394
1618.27	0.257949
1620.2	0.261223
1622.13	0.260231
1624.06	0.259846
1625.99	0.260986
1627.92	0.260617
1629.85	0.26081
1631.77	0.260886
1633.7	0.256898
1635.63	0.253114
1637.56	0.256498
1639.49	0.260331
1641.42	0.261044
1643.35	0.259956
1645.28	0.255426
1647.2	0.252565
1649.13	0.254757
1651.06	0.2509
1652.99	0.243609
1654.92	0.249556
1656.85	0.256844
1658.78	0.258407
1660.71	0.257332
1662.64	0.255454
1664.56	0.255818
1666.49	0.255466
1668.42	0.251321
1670.35	0.250025
1672.28	0.251745
1674.21	0.25085
1676.14	0.251368
1678.07	0.254009
1679.99	0.254073
1681.92	0.2503
1683.85	0.244767
1685.78	0.246343
1687.71	0.250527
1689.64	0.250805
1691.57	0.252022
1693.5	0.250705
1695.43	0.247251
1697.35	0.247392
1699.28	0.244754
1701.21	0.244863
1703.14	0.249728
1705.07	0.24994
1707	0.250093
1708.93	0.252246
1710.86	0.25294
1712.78	0.252599
1714.71	0.250626
1716.64	0.247884
1718.57	0.248915
1720.5	0.252733
1722.43	0.253752
1724.36	0.253219
1726.29	0.253474
1728.22	0.253026
1730.14	0.252732
1732.07	0.250372
1734	0.247614
1735.93	0.25138
1737.86	0.253573
1739.79	0.251783
1741.72	0.251654
1743.65	0.251857
1745.57	0.25125
1747.5	0.2506
1749.43	0.249175
1751.36	0.249367
1753.29	0.251694
1755.22	0.251682
1757.15	0.250268
1759.08	0.249683
1761	0.247791
1762.93	0.247442
1764.86	0.248831
1766.79	0.248152
1768.72	0.247401
1770.65	0.246151
1772.58	0.244912
1774.51	0.246973
1776.44	0.248545
1778.36	0.247757
1780.29	0.246823
1782.22	0.246684
1784.15	0.246722
1786.08	0.247144
1788.01	0.248001
1789.94	0.246872
1791.87	0.244665
1793.79	0.245205
1795.72	0.246522
1797.65	0.246016
1799.58	0.244865
1801.51	0.24481
1803.44	0.245898
1805.37	0.246833
1807.3	0.247103
1809.23	0.246766
1811.15	0.24647
1813.08	0.246615
1815.01	0.246373
1816.94	0.245834
1818.87	0.245675
1820.8	0.245932
1822.73	0.245552
1824.66	0.244887
1826.58	0.245266
1828.51	0.244842
1830.44	0.244251
1832.37	0.245294
1834.3	0.245672
1836.23	0.245073
1838.16	0.244977
1840.09	0.245212
1842.01	0.244008
1843.94	0.242339
1845.87	0.243601
1847.8	0.24534
1849.73	0.245512
1851.66	0.24544
1853.59	0.245128
1855.52	0.244831
1857.45	0.244789
1859.37	0.244908
1861.3	0.245189
1863.23	0.245438
1865.16	0.245309
1867.09	0.244023
1869.02	0.243003
1870.95	0.243902
1872.88	0.244764
1874.8	0.244728
1876.73	0.244884
1878.66	0.245228
1880.59	0.245582
1882.52	0.24584
1884.45	0.245937
1886.38	0.245789
1888.31	0.244954
1890.24	0.244511
1892.16	0.244933
1894.09	0.244983
1896.02	0.245076
1897.95	0.245613
1899.88	0.245976
1901.81	0.246168
1903.74	0.246275
1905.67	0.246118
1907.59	0.245655
1909.52	0.245287
1911.45	0.245281
1913.38	0.245563
1915.31	0.245453
1917.24	0.244942
1919.17	0.24548
1921.1	0.246255
1923.03	0.246213
1924.95	0.246402
1926.88	0.246425
1928.81	0.245964
1930.74	0.245744
1932.67	0.245736
1934.6	0.245905
1936.53	0.246195
1938.46	0.24637
1940.38	0.246024
1942.31	0.24541
1944.24	0.245386
1946.17	0.245591
1948.1	0.245545
1950.03	0.245537
1951.96	0.245739
1953.89	0.24608
1955.81	0.24645
1957.74	0.246782
1959.67	0.246831
1961.6	0.246681
1963.53	0.246557
1965.46	0.24624
1967.39	0.246106
1969.32	0.246614
1971.25	0.247321
1973.17	0.248088
1975.1	0.24901
1977.03	0.250002
1978.96	0.251331
1980.89	0.253218
1982.82	0.25563
1984.75	0.258018
1986.68	0.259523
1988.6	0.259973
1990.53	0.259686
1992.46	0.259324
1994.39	0.259349
1996.32	0.259466
1998.25	0.25971
2000.18	0.260227
2002.11	0.260607
2004.04	0.260468
2005.96	0.259766
2007.89	0.258833
2009.82	0.258045
2011.75	0.257421
2013.68	0.256723
2015.61	0.255885
2017.54	0.255252
2019.47	0.254883
2021.39	0.254506
2023.32	0.254159
2025.25	0.253926
2027.18	0.25381
2029.11	0.253863
2031.04	0.253989
2032.97	0.253964
2034.9	0.253718
2036.82	0.253426
2038.75	0.253213
2040.68	0.253167
2042.61	0.253438
2044.54	0.253972
2046.47	0.254583
2048.4	0.255007
2050.33	0.255146
2052.26	0.255079
2054.18	0.254723
2056.11	0.254268
2058.04	0.254075
2059.97	0.254175
2061.9	0.254539
2063.83	0.25517
2065.76	0.255986
2067.69	0.256746
2069.61	0.257289
2071.54	0.257794
2073.47	0.258237
2075.4	0.258444
2077.33	0.258478
2079.26	0.258315
2081.19	0.257988
2083.12	0.257754
2085.05	0.257675
2086.97	0.257515
2088.9	0.257162
2090.83	0.256729
2092.76	0.256231
2094.69	0.255668
2096.62	0.255141
2098.55	0.254782
2100.48	0.254712
2102.4	0.254817
2104.33	0.254945
2106.26	0.255057
2108.19	0.255092
2110.12	0.254957
2112.05	0.254576
2113.98	0.254163
2115.91	0.253932
2117.83	0.253874
2119.76	0.254067
2121.69	0.254434
2123.62	0.254801
2125.55	0.255089
2127.48	0.25517
2129.41	0.255027
2131.34	0.254738
2133.27	0.254389
2135.19	0.254155
2137.12	0.254251
2139.05	0.254661
2140.98	0.255129
2142.91	0.255553
2144.84	0.255802
2146.77	0.255679
2148.7	0.255314
2150.62	0.254941
2152.55	0.254641
2154.48	0.254456
2156.41	0.254446
2158.34	0.25454
2160.27	0.254633
2162.2	0.254629
2164.13	0.254405
2166.06	0.254034
2167.98	0.253573
2169.91	0.253002
2171.84	0.252477
2173.77	0.252215
2175.7	0.252387
2177.63	0.252881
2179.56	0.253317
2181.49	0.253527
2183.41	0.253512
2185.34	0.253224
2187.27	0.252745
2189.2	0.252278
2191.13	0.251999
2193.06	0.251998
2194.99	0.252197
2196.92	0.252534
2198.85	0.252867
2200.77	0.252987
2202.7	0.25291
2204.63	0.252548
2206.56	0.251928
2208.49	0.251472
2210.42	0.251337
2212.35	0.251377
2214.28	0.251572
2216.2	0.251897
2218.13	0.25214
2220.06	0.252119
2221.99	0.251853
2223.92	0.251498
2225.85	0.251178
2227.78	0.250958
2229.71	0.250933
2231.63	0.251126
2233.56	0.251475
2235.49	0.25181
2237.42	0.251951
2239.35	0.251937
2241.28	0.251759
2243.21	0.251384
2245.14	0.250998
2247.07	0.250837
2248.99	0.250986
2250.92	0.251269
2252.85	0.251549
2254.78	0.25184
2256.71	0.252033
2258.64	0.25199
2260.57	0.25173
2262.5	0.251407
2264.42	0.251195
2266.35	0.251157
2268.28	0.251304
2270.21	0.25162
2272.14	0.251982
2274.07	0.252265
2276	0.252375
2277.93	0.252309
2279.86	0.252174
2281.78	0.251987
2283.71	0.251817
2285.64	0.25177
2287.57	0.251838
2289.5	0.252061
2291.43	0.252319
2293.36	0.252393
2295.29	0.252237
2297.21	0.251882
2299.14	0.25148
2301.07	0.251122
2303	0.250742
2304.93	0.250405
2306.86	0.250151
2308.79	0.249896
2310.72	0.249535
2312.64	0.248947
2314.57	0.248169
2316.5	0.24722
2318.43	0.246084
2320.36	0.244925
2322.29	0.243974
2324.22	0.24346
2326.15	0.243155
2328.08	0.242673
2330	0.242153
2331.93	0.241801
2333.86	0.241543
2335.79	0.241156
2337.72	0.240673
2339.65	0.240435
2341.58	0.240692
2343.51	0.241427
2345.43	0.243221
2347.36	0.246221
2349.29	0.247571
2351.22	0.245413
2353.15	0.241934
2355.08	0.239396
2357.01	0.237718
2358.94	0.236797
2360.87	0.236609
2362.79	0.237126
2364.72	0.238186
2366.65	0.239486
2368.58	0.240971
2370.51	0.242563
2372.44	0.244289
2374.37	0.246239
2376.3	0.248305
2378.22	0.25024
2380.15	0.251884
2382.08	0.253195
2384.01	0.254162
2385.94	0.254774
2387.87	0.255058
2389.8	0.255118
2391.73	0.254974
2393.66	0.254737
2395.58	0.25462
2397.51	0.25463
2399.44	0.254769
2401.37	0.255063
2403.3	0.255374
2405.23	0.255539
2407.16	0.25555
2409.09	0.255475
2411.01	0.255301
2412.94	0.255161
2414.87	0.255188
2416.8	0.255277
2418.73	0.25545
2420.66	0.255712
2422.59	0.255925
2424.52	0.256017
2426.44	0.255928
2428.37	0.255734
2430.3	0.25559
2432.23	0.25553
2434.16	0.255564
2436.09	0.255716
2438.02	0.255968
2439.95	0.25622
2441.88	0.256415
2443.8	0.256481
2445.73	0.256337
2447.66	0.256155
2449.59	0.256047
2451.52	0.256045
2453.45	0.256231
2455.38	0.256488
2457.31	0.256813
2459.23	0.257176
2461.16	0.257302
2463.09	0.257271
2465.02	0.257266
2466.95	0.257193
2468.88	0.257056
2470.81	0.25705
2472.74	0.257238
2474.67	0.257426
2476.59	0.257569
2478.52	0.257727
2480.45	0.257794
2482.38	0.257755
2484.31	0.257642
2486.24	0.2575
2488.17	0.257479
2490.1	0.257611
2492.02	0.257845
2493.95	0.258131
2495.88	0.258364
2497.81	0.258447
2499.74	0.258428
2501.67	0.2584
2503.6	0.258359
2505.53	0.258343
2507.45	0.258379
2509.38	0.258449
2511.31	0.258572
2513.24	0.258707
2515.17	0.258851
2517.1	0.258969
2519.03	0.258952
2520.96	0.258869
2522.89	0.258829
2524.81	0.258816
2526.74	0.258834
2528.67	0.258909
2530.6	0.259013
2532.53	0.25909
2534.46	0.259143
2536.39	0.259188
2538.32	0.259202
2540.24	0.259154
2542.17	0.259072
2544.1	0.259027
2546.03	0.25905
2547.96	0.259167
2549.89	0.259355
2551.82	0.259508
2553.75	0.259581
2555.68	0.259628
2557.6	0.259628
2559.53	0.259574
2561.46	0.259555
2563.39	0.259581
2565.32	0.259658
2567.25	0.259822
2569.18	0.260004
2571.11	0.260176
2573.03	0.260332
2574.96	0.260413
2576.89	0.260411
2578.82	0.260333
2580.75	0.260257
2582.68	0.260289
2584.61	0.260372
2586.54	0.260418
2588.46	0.26055
2590.39	0.260783
2592.32	0.260956
2594.25	0.261096
2596.18	0.261141
2598.11	0.261012
2600.04	0.26086
2601.97	0.260714
2603.9	0.260704
2605.82	0.26092
2607.75	0.261123
2609.68	0.261303
2611.61	0.261525
2613.54	0.261638
2615.47	0.261609
2617.4	0.261512
2619.33	0.261369
2621.25	0.26125
2623.18	0.261293
2625.11	0.261489
2627.04	0.261777
2628.97	0.262135
2630.9	0.262418
2632.83	0.262475
2634.76	0.262302
2636.69	0.262054
2638.61	0.261917
2640.54	0.261868
2642.47	0.261971
2644.4	0.262352
2646.33	0.262738
2648.26	0.262947
2650.19	0.263075
2652.12	0.263027
2654.04	0.262854
2655.97	0.262726
2657.9	0.262612
2659.83	0.26261
2661.76	0.262838
2663.69	0.263249
2665.62	0.263687
2667.55	0.263968
2669.48	0.264018
2671.4	0.263764
2673.33	0.263433
2675.26	0.26333
2677.19	0.263356
2679.12	0.263517
2681.05	0.263867
2682.98	0.264221
2684.91	0.264477
2686.83	0.264632
2688.76	0.264673
2690.69	0.264528
2692.62	0.264233
2694.55	0.264036
2696.48	0.264075
2698.41	0.264315
2700.34	0.264705
2702.26	0.265086
2704.19	0.265291
2706.12	0.265339
2708.05	0.265246
2709.98	0.265047
2711.91	0.264849
2713.84	0.264718
2715.77	0.264848
2717.7	0.265226
2719.62	0.265545
2721.55	0.26578
2723.48	0.26598
2725.41	0.265992
2727.34	0.265826
2729.27	0.265692
2731.2	0.265554
2733.13	0.265409
2735.05	0.265586
2736.98	0.266026
2738.91	0.26641
2740.84	0.266655
2742.77	0.266692
2744.7	0.266571
2746.63	0.26637
2748.56	0.266189
2750.49	0.266215
2752.41	0.266375
2754.34	0.26656
2756.27	0.266853
2758.2	0.267264
2760.13	0.26758
2762.06	0.267606
2763.99	0.267444
2765.92	0.267265
2767.84	0.267187
2769.77	0.267237
2771.7	0.267362
2773.63	0.267628
2775.56	0.267952
2777.49	0.268226
2779.42	0.268464
2781.35	0.268478
2783.27	0.268267
2785.2	0.268091
2787.13	0.26803
2789.06	0.26817
2790.99	0.268494
2792.92	0.268802
2794.85	0.269046
2796.78	0.269253
2798.71	0.269432
2800.63	0.269561
2802.56	0.269571
2804.49	0.269517
2806.42	0.269523
2808.35	0.269647
2810.28	0.269882
2812.21	0.270173
2814.14	0.270458
2816.06	0.270666
2817.99	0.270775
2819.92	0.270886
2821.85	0.271013
2823.78	0.271075
2825.71	0.271229
2827.64	0.271584
2829.57	0.271971
2831.5	0.272359
2833.42	0.272772
2835.35	0.27317
2837.28	0.273684
2839.21	0.274439
2841.14	0.275415
2843.07	0.276683
2845	0.278427
2846.93	0.280714
2848.85	0.28296
2850.78	0.284033
2852.71	0.28374
2854.64	0.282923
2856.57	0.282069
2858.5	0.28123
2860.43	0.280444
2862.36	0.279857
2864.29	0.279525
2866.21	0.279361
2868.14	0.279363
2870.07	0.279423
2872	0.279516
2873.93	0.279692
2875.86	0.279733
2877.79	0.279534
2879.72	0.279257
2881.64	0.279101
2883.57	0.279139
2885.5	0.279405
2887.43	0.279873
2889.36	0.28039
2891.29	0.280913
2893.22	0.281378
2895.15	0.281758
2897.07	0.282166
2899	0.282616
2900.93	0.283138
2902.86	0.283707
2904.79	0.284336
2906.72	0.285283
2908.65	0.28662
2910.58	0.28832
2912.51	0.290511
2914.43	0.292885
2916.36	0.294701
2918.29	0.295721
2920.22	0.296066
2922.15	0.295833
2924.08	0.295356
2926.01	0.294812
2927.94	0.294132
2929.86	0.293267
2931.79	0.292217
2933.72	0.291033
2935.65	0.289754
2937.58	0.288675
2939.51	0.287895
2941.44	0.287178
2943.37	0.286727
2945.3	0.286682
2947.22	0.286763
2949.15	0.286796
2951.08	0.286834
2953.01	0.286983
2954.94	0.287112
2956.87	0.287088
2958.8	0.286944
2960.73	0.286728
2962.65	0.28653
2964.58	0.286222
2966.51	0.285628
2968.44	0.284842
2970.37	0.283918
2972.3	0.282959
2974.23	0.282222
2976.16	0.281705
2978.08	0.281248
2980.01	0.280908
2981.94	0.280817
2983.87	0.280748
2985.8	0.280434
2987.73	0.280134
2989.66	0.279806
2991.59	0.279237
2993.52	0.27889
2995.44	0.278866
2997.37	0.278834
2999.3	0.2788
3001.23	0.278836
3003.16	0.278898
3005.09	0.278883
3007.02	0.278765
3008.95	0.278531
3010.87	0.278265
3012.8	0.278123
3014.73	0.278142
3016.66	0.278352
3018.59	0.278601
3020.52	0.278818
3022.45	0.278992
3024.38	0.278987
3026.31	0.27891
3028.23	0.278748
3030.16	0.278527
3032.09	0.278484
3034.02	0.278629
3035.95	0.278894
3037.88	0.279112
3039.81	0.279219
3041.74	0.279333
3043.66	0.27943
3045.59	0.279444
3047.52	0.279357
3049.45	0.279277
3051.38	0.279321
3053.31	0.279466
3055.24	0.279706
3057.17	0.280016
3059.09	0.280245
3061.02	0.280266
3062.95	0.280149
3064.88	0.280011
3066.81	0.279988
3068.74	0.280151
3070.67	0.280346
3072.6	0.280483
3074.53	0.280539
3076.45	0.280575
3078.38	0.280778
3080.31	0.280924
3082.24	0.280829
3084.17	0.280827
3086.1	0.280951
3088.03	0.281009
3089.96	0.281104
3091.88	0.2813
3093.81	0.281549
3095.74	0.281725
3097.67	0.281729
3099.6	0.281669
3101.53	0.281632
3103.46	0.281664
3105.39	0.281702
3107.32	0.281748
3109.24	0.281975
3111.17	0.282209
3113.1	0.282314
3115.03	0.282421
3116.96	0.282498
3118.89	0.282603
3120.82	0.282778
3122.75	0.282893
3124.67	0.282923
3126.6	0.282965
3128.53	0.283165
3130.46	0.283451
3132.39	0.283692
3134.32	0.283957
3136.25	0.284095
3138.18	0.28404
3140.11	0.284102
3142.03	0.284232
3143.96	0.284222
3145.89	0.284259
3147.82	0.284446
3149.75	0.284688
3151.68	0.284954
3153.61	0.285254
3155.54	0.285485
3157.46	0.285488
3159.39	0.285453
3161.32	0.285554
3163.25	0.285607
3165.18	0.285661
3167.11	0.285929
3169.04	0.286342
3170.97	0.28666
3172.89	0.286754
3174.82	0.286786
3176.75	0.28688
3178.68	0.286888
3180.61	0.286846
3182.54	0.28697
3184.47	0.287175
3186.4	0.28735
3188.33	0.287602
3190.25	0.287915
3192.18	0.288151
3194.11	0.288198
3196.04	0.288101
3197.97	0.288061
3199.9	0.288183
3201.83	0.28846
3203.76	0.288843
3205.68	0.289169
3207.61	0.289368
3209.54	0.289615
3211.47	0.289774
3213.4	0.289698
3215.33	0.289693
3217.26	0.289698
3219.19	0.289687
3221.12	0.28997
3223.04	0.290322
3224.97	0.290617
3226.9	0.291044
3228.83	0.291297
3230.76	0.291186
3232.69	0.291099
3234.62	0.291229
3236.55	0.291449
3238.47	0.291652
3240.4	0.29186
3242.33	0.292167
3244.26	0.2924
3246.19	0.292602
3248.12	0.292967
3250.05	0.293136
3251.98	0.293047
3253.9	0.293057
3255.83	0.293155
3257.76	0.293361
3259.69	0.293746
3261.62	0.294043
3263.55	0.294205
3265.48	0.294373
3267.41	0.294354
3269.34	0.29427
3271.26	0.294397
3273.19	0.294504
3275.12	0.29466
3277.05	0.294976
3278.98	0.295159
3280.91	0.295322
3282.84	0.295599
3284.77	0.295822
3286.69	0.295944
3288.62	0.295862
3290.55	0.295683
3292.48	0.295733
3294.41	0.295989
3296.34	0.296354
3298.27	0.296838
3300.2	0.297162
3302.13	0.297069
3304.05	0.296935
3305.98	0.297129
3307.91	0.297399
3309.84	0.297601
3311.77	0.297832
3313.7	0.298078
3315.63	0.298318
3317.56	0.298496
3319.48	0.298729
3321.41	0.299067
3323.34	0.299172
3325.27	0.299105
3327.2	0.299302
3329.13	0.299653
3331.06	0.299896
3332.99	0.300129
3334.92	0.300404
3336.84	0.300779
3338.77	0.301172
3340.7	0.301346
3342.63	0.301507
3344.56	0.301715
3346.49	0.301772
3348.42	0.301936
3350.35	0.302343
3352.27	0.302735
3354.2	0.303023
3356.13	0.30331
3358.06	0.303527
3359.99	0.303584
3361.92	0.303695
3363.85	0.303878
3365.78	0.303981
3367.7	0.304193
3369.63	0.304565
3371.56	0.304945
3373.49	0.305314
3375.42	0.30553
3377.35	0.305631
3379.28	0.305849
3381.21	0.306045
3383.14	0.306162
3385.06	0.306318
3386.99	0.306494
3388.92	0.306729
3390.85	0.306956
3392.78	0.30722
3394.71	0.307523
3396.64	0.307548
3398.57	0.307515
3400.49	0.307783
3402.42	0.308091
3404.35	0.308343
3406.28	0.30863
3408.21	0.308776
3410.14	0.308841
3412.07	0.309065
3414	0.30932
3415.93	0.309438
3417.85	0.309501
3419.78	0.30952
3421.71	0.309532
3423.64	0.309683
3425.57	0.309926
3427.5	0.310125
3429.43	0.310276
3431.36	0.31035
3433.28	0.310344
3435.21	0.310303
3437.14	0.310301
3439.07	0.310413
3441	0.310543
3442.93	0.310627
3444.86	0.310599
3446.79	0.310464
3448.71	0.310522
3450.64	0.310652
3452.57	0.310541
3454.5	0.310374
3456.43	0.310357
3458.36	0.310431
3460.29	0.310412
3462.22	0.310315
3464.15	0.310241
3466.07	0.310152
3468	0.310163
3469.93	0.31021
3471.86	0.310085
3473.79	0.309875
3475.72	0.309779
3477.65	0.309863
3479.58	0.309854
3481.5	0.309735
3483.43	0.309795
3485.36	0.309775
3487.29	0.309656
3489.22	0.309738
3491.15	0.309668
3493.08	0.3094
3495.01	0.309325
3496.94	0.309333
3498.86	0.309265
3500.79	0.30903
3502.72	0.308725
3504.65	0.308712
3506.58	0.308691
3508.51	0.30836
3510.44	0.30815
3512.37	0.308242
3514.29	0.308322
3516.22	0.308186
3518.15	0.308046
3520.08	0.307887
3522.01	0.307439
3523.94	0.307091
3525.87	0.307063
3527.8	0.307079
3529.72	0.30734
3531.65	0.307953
3533.58	0.30854
3535.51	0.309034
3537.44	0.30975
3539.37	0.310742
3541.3	0.311728
3543.23	0.31188
3545.16	0.310739
3547.08	0.309683
3549.01	0.309236
3550.94	0.308404
3552.87	0.307899
3554.8	0.308508
3556.73	0.309616
3558.66	0.311381
3560.59	0.314965
3562.51	0.321379
3564.44	0.330693
3566.37	0.345442
3568.3	0.37071
3570.23	0.399595
3572.16	0.410772
3574.09	0.393142
3576.02	0.362845
3577.95	0.33855
3579.87	0.323231
3581.8	0.314175
3583.73	0.308604
3585.66	0.30374
3587.59	0.30016
3589.52	0.299859
3591.45	0.300128
3593.38	0.298909
3595.3	0.298141
3597.23	0.298281
3599.16	0.297953
3601.09	0.297536
3603.02	0.297763
3604.95	0.297517
3606.88	0.295786
3608.81	0.29445
3610.74	0.294589
3612.66	0.294435
3614.59	0.294699
3616.52	0.294641
3618.45	0.29298
3620.38	0.293186
3622.31	0.295043
3624.24	0.295746
3626.17	0.293809
3628.09	0.28959
3630.02	0.2898
3631.95	0.293617
3633.88	0.294828
3635.81	0.295233
3637.74	0.295935
3639.67	0.295972
3641.6	0.295961
3643.52	0.295842
3645.45	0.294139
3647.38	0.290341
3649.31	0.287607
3651.24	0.290058
3653.17	0.293531
3655.1	0.293201
3657.03	0.292847
3658.96	0.294693
3660.88	0.295399
3662.81	0.29501
3664.74	0.294747
3666.67	0.29369
3668.6	0.290318
3670.53	0.288596
3672.46	0.289906
3674.39	0.287759
3676.31	0.286749
3678.24	0.290839
3680.17	0.293003
3682.1	0.293526
3684.03	0.293886
3685.96	0.29212
3687.89	0.288875
3689.82	0.288251
3691.75	0.290991
3693.67	0.293337
3695.6	0.294172
3697.53	0.294385
3699.46	0.293802
3701.39	0.292688
3703.32	0.293217
3705.25	0.294286
3707.18	0.293447
3709.1	0.291309
3711.03	0.289414
3712.96	0.290711
3714.89	0.29378
3716.82	0.294685
3718.75	0.294112
3720.68	0.293401
3722.61	0.293055
3724.53	0.292623
3726.46	0.292578
3728.39	0.293516
3730.32	0.292818
3732.25	0.290414
3734.18	0.288927
3736.11	0.28907
3738.04	0.291145
3739.97	0.293425
3741.89	0.291564
3743.82	0.286809
3745.75	0.287809
3747.68	0.290335
3749.61	0.287988
3751.54	0.287822
3753.47	0.291911
3755.4	0.29466
3757.32	0.29487
3759.25	0.294274
3761.18	0.295561
3763.11	0.296418
3765.04	0.295647
3766.97	0.295412
3768.9	0.294995
3770.83	0.295373
3772.76	0.297065
3774.68	0.297806
3776.61	0.297309
3778.54	0.296261
3780.47	0.29642
3782.4	0.297494
3784.33	0.297425
3786.26	0.297536
3788.19	0.298294
3790.11	0.298394
3792.04	0.298506
3793.97	0.297704
3795.9	0.296199
3797.83	0.2963
3799.76	0.294622
3801.69	0.292814
3803.62	0.295336
3805.55	0.295509
3807.47	0.294719
3809.4	0.297242
3811.33	0.298722
3813.26	0.297355
3815.19	0.29438
3817.12	0.294309
3819.05	0.294884
3820.98	0.29301
3822.9	0.29508
3824.83	0.297706
3826.76	0.297423
3828.69	0.297714
3830.62	0.297203
3832.55	0.296174
3834.48	0.295634
3836.41	0.293835
3838.33	0.293216
3840.26	0.295176
3842.19	0.296509
3844.12	0.297422
3846.05	0.298782
3847.98	0.299111
3849.91	0.297159
3851.84	0.291745
3853.77	0.287976
3855.69	0.293271
3857.62	0.298247
3859.55	0.298771
3861.48	0.298014
3863.41	0.296671
3865.34	0.296787
3867.27	0.297411
3869.2	0.295744
3871.12	0.29604
3873.05	0.297951
3874.98	0.298804
3876.91	0.30014
3878.84	0.299396
3880.77	0.298193
3882.7	0.299079
3884.63	0.298135
3886.56	0.297997
3888.48	0.299681
3890.41	0.298915
3892.34	0.298679
3894.27	0.300585
3896.2	0.30087
3898.13	0.299132
3900.06	0.297594
3901.99	0.297097
3903.91	0.29733
3905.84	0.299053
3907.77	0.301166
3909.7	0.301854
3911.63	0.302024
3913.56	0.302125
3915.49	0.301362
3917.42	0.300455
3919.34	0.300721
3921.27	0.301463
3923.2	0.301419
3925.13	0.301434
3927.06	0.302144
3928.99	0.302342
3930.92	0.301761
3932.85	0.301651
3934.78	0.302231
3936.7	0.302651
3938.63	0.30288
3940.56	0.302629
3942.49	0.302014
3944.42	0.302311
3946.35	0.302846
3948.28	0.302658
3950.21	0.302686
3952.13	0.303135
3954.06	0.303425
3955.99	0.303491
3957.92	0.303475
3959.85	0.303463
3961.78	0.303494
3963.71	0.303642
3965.64	0.303775
3967.57	0.303921
3969.49	0.304218
3971.42	0.304295
3973.35	0.304111
3975.28	0.304117
3977.21	0.304359
3979.14	0.304513
3981.07	0.304357
3983	0.304312
3984.92	0.304725
3986.85	0.305013
3988.78	0.304934
3990.71	0.304968
3992.64	0.305128
3994.57	0.305128
3996.5	0.305038
3998.43	0.305028
4000.35	0.305156

## Sheet: Sheet2
Wavenumber	Silicone
399.264	0.284039
401.193	0.279051
403.122	0.275339
405.05	0.271728
406.979	0.268068
408.908	0.26608
410.837	0.264763
412.766	0.262125
414.694	0.259667
416.623	0.253845
418.552	0.246869
420.481	0.247036
422.41	0.247595
424.339	0.245458
426.267	0.244322
428.196	0.24289
430.125	0.240555
432.054	0.237894
433.983	0.236413
435.911	0.235996
437.84	0.235136
439.769	0.23425
441.698	0.231805
443.627	0.229348
445.555	0.229073
447.484	0.22832
449.413	0.22767
451.342	0.227927
453.271	0.228265
455.2	0.229109
457.128	0.231048
459.057	0.235157
460.986	0.239021
462.915	0.241305
464.844	0.243134
466.772	0.244785
468.701	0.248778
470.63	0.255374
472.559	0.260778
474.488	0.261037
476.416	0.255481
478.345	0.247604
480.274	0.240301
482.203	0.234488
484.132	0.230745
486.06	0.228563
487.989	0.227374
489.918	0.226171
491.847	0.224308
493.776	0.223398
495.705	0.22352
497.633	0.223079
499.562	0.222374
501.491	0.222791
503.42	0.224958
505.349	0.227722
507.277	0.229917
509.206	0.231828
511.135	0.233649
513.064	0.235113
514.993	0.236333
516.921	0.237944
518.85	0.240987
520.779	0.246135
522.708	0.252026
524.637	0.256652
526.566	0.260951
528.494	0.266532
530.423	0.272818
532.352	0.279602
534.281	0.287843
536.21	0.297781
538.138	0.309076
540.067	0.321831
541.996	0.335794
543.925	0.349853
545.854	0.363474
547.782	0.378199
549.711	0.397335
551.64	0.422605
553.569	0.454533
555.498	0.495296
557.427	0.548292
559.355	0.615576
561.284	0.695829
563.213	0.78564
565.142	0.878833
567.071	0.963095
568.999	1.02265
570.928	1.04779
572.857	1.03494
574.786	0.978994
576.715	0.880564
578.643	0.76117
580.572	0.648674
582.501	0.559996
584.43	0.500182
586.359	0.464093
588.287	0.442029
590.216	0.432889
592.145	0.447048
594.074	0.493737
596.003	0.584475
597.932	0.726609
599.86	0.887441
601.789	0.989106
603.718	0.972166
605.647	0.849527
607.576	0.699646
609.504	0.581618
611.433	0.505689
613.362	0.460337
615.291	0.434037
617.22	0.420705
619.148	0.419267
621.077	0.432764
623.006	0.462971
624.935	0.509793
626.864	0.568491
628.793	0.623513
630.721	0.65767
632.65	0.664518
634.579	0.64658
636.508	0.610673
638.437	0.566785
640.365	0.521294
642.294	0.477981
644.223	0.439616
646.152	0.407291
648.081	0.38071
650.009	0.359691
651.938	0.343663
653.867	0.330774
655.796	0.320314
657.725	0.311928
659.654	0.304843
661.582	0.298262
663.511	0.292964
665.44	0.286347
667.369	0.2769
669.298	0.274381
671.226	0.276239
673.155	0.273769
675.084	0.269815
677.013	0.266182
678.942	0.262059
680.87	0.257893
682.799	0.254018
684.728	0.251345
686.657	0.249429
688.586	0.248004
690.515	0.247193
692.443	0.246428
694.372	0.245457
696.301	0.244117
698.23	0.242219
700.159	0.239888
702.087	0.23801
704.016	0.23683
705.945	0.23606
707.874	0.235984
709.803	0.236155
711.731	0.23584
713.66	0.234967
715.589	0.233532
717.518	0.231399
719.447	0.228838
721.375	0.226711
723.304	0.225281
725.233	0.224485
727.162	0.22448
729.091	0.224487
731.02	0.223861
732.948	0.222633
734.877	0.220606
736.806	0.218297
738.735	0.216459
740.664	0.21558
742.592	0.215909
744.521	0.216797
746.45	0.217768
748.379	0.218448
750.308	0.218223
752.236	0.217115
754.165	0.215472
756.094	0.213908
758.023	0.213087
759.952	0.213116
761.881	0.213825
763.809	0.214879
765.738	0.215604
767.667	0.215572
769.596	0.214795
771.525	0.21321
773.453	0.211257
775.382	0.209987
777.311	0.210012
779.24	0.211128
781.169	0.212622
783.097	0.213907
785.026	0.214651
786.955	0.214584
788.884	0.213699
790.813	0.212409
792.742	0.2115
794.67	0.211622
796.599	0.212856
798.528	0.214742
800.457	0.21662
802.386	0.218065
804.314	0.218438
806.243	0.217504
808.172	0.21611
810.101	0.214953
812.03	0.214657
813.958	0.215643
815.887	0.217469
817.816	0.219393
819.745	0.220875
821.674	0.221837
823.602	0.222183
825.531	0.221867
827.46	0.221456
829.389	0.221553
831.318	0.222377
833.247	0.224015
835.175	0.226426
837.104	0.228827
839.033	0.23044
840.962	0.231347
842.891	0.231762
844.819	0.232066
846.748	0.232766
848.677	0.234009
850.606	0.23591
852.535	0.238351
854.463	0.240841
856.392	0.243111
858.321	0.244944
860.25	0.246477
862.179	0.247991
864.108	0.249573
866.036	0.252296
867.965	0.25635
869.894	0.26186
871.823	0.268823
873.752	0.272281
875.68	0.270963
877.609	0.271427
879.538	0.273551
881.467	0.271615
883.396	0.267652
885.324	0.267021
887.253	0.269227
889.182	0.271955
891.111	0.27493
893.04	0.277795
894.969	0.280147
896.897	0.282076
898.826	0.283691
900.755	0.285276
902.684	0.287234
904.613	0.289814
906.541	0.293062
908.47	0.296832
910.399	0.300748
912.328	0.304346
914.257	0.307599
916.185	0.310756
918.114	0.313942
920.043	0.317331
921.972	0.321012
923.901	0.325131
925.83	0.329726
927.758	0.334478
929.687	0.339159
931.616	0.343729
933.545	0.348032
935.474	0.351885
937.402	0.356173
939.331	0.361462
941.26	0.367771
943.189	0.375325
945.118	0.383031
947.046	0.389845
948.975	0.396197
950.904	0.403603
952.833	0.411731
954.762	0.422441
956.69	0.43989
958.619	0.468438
960.548	0.518447
962.477	0.55512
964.406	0.515649
966.335	0.453412
968.263	0.429154
970.192	0.429411
972.121	0.4355
974.05	0.443709
975.979	0.452886
977.907	0.464148
979.836	0.476411
981.765	0.488712
983.694	0.499404
985.623	0.507873
987.551	0.51626
989.48	0.526015
991.409	0.537482
993.338	0.550504
995.267	0.565425
997.196	0.582384
999.124	0.601566
1001.05	0.623071
1002.98	0.646799
1004.91	0.673616
1006.84	0.704219
1008.77	0.739473
1010.7	0.77971
1012.63	0.824908
1014.55	0.877091
1016.48	0.938397
1018.41	1.00702
1020.34	1.0837
1022.27	1.1782
1024.2	1.29585
1026.13	1.41747
1028.06	1.52545
1029.99	1.64251
1031.91	1.77964
1033.84	1.88649
1035.77	1.93221
1037.7	1.9647
1039.63	2.02124
1041.56	2.08019
1043.49	2.11463
1045.42	2.12983
1047.34	2.12615
1049.27	2.10496
1051.2	2.07513
1053.13	2.04493
1055.06	2.01761
1056.99	1.98917
1058.92	1.95912
1060.85	1.92536
1062.78	1.87678
1064.7	1.81527
1066.63	1.74649
1068.56	1.67009
1070.49	1.5907
1072.42	1.50721
1074.35	1.41182
1076.28	1.29514
1078.21	1.16926
1080.13	1.06904
1082.06	1.03209
1083.99	1.09116
1085.92	1.24809
1087.85	1.42653
1089.78	1.5113
1091.71	1.50528
1093.64	1.45874
1095.56	1.39469
1097.49	1.32012
1099.42	1.23877
1101.35	1.15535
1103.28	1.07153
1105.21	0.989911
1107.14	0.912648
1109.07	0.842616
1111	0.782447
1112.92	0.732128
1114.85	0.691
1116.78	0.658293
1118.71	0.632639
1120.64	0.611573
1122.57	0.592633
1124.5	0.574594
1126.43	0.55663
1128.35	0.538653
1130.28	0.521838
1132.21	0.507005
1134.14	0.494021
1136.07	0.482766
1138	0.473212
1139.93	0.464675
1141.86	0.456587
1143.79	0.449074
1145.71	0.442059
1147.64	0.435303
1149.57	0.428984
1151.5	0.423488
1153.43	0.418846
1155.36	0.414764
1157.29	0.411047
1159.22	0.40745
1161.14	0.403711
1163.07	0.399589
1165	0.395112
1166.93	0.390753
1168.86	0.386721
1170.79	0.38318
1172.72	0.380303
1174.65	0.377821
1176.57	0.375533
1178.5	0.373275
1180.43	0.370741
1182.36	0.367795
1184.29	0.36473
1186.22	0.36196
1188.15	0.359501
1190.08	0.357484
1192.01	0.355983
1193.93	0.354553
1195.86	0.352852
1197.79	0.350878
1199.72	0.348686
1201.65	0.3461
1203.58	0.343232
1205.51	0.340809
1207.44	0.339133
1209.36	0.337947
1211.29	0.337033
1213.22	0.33607
1215.15	0.334835
1217.08	0.333334
1219.01	0.331469
1220.94	0.329337
1222.87	0.327316
1224.8	0.325688
1226.72	0.324653
1228.65	0.324071
1230.58	0.323559
1232.51	0.32294
1234.44	0.322002
1236.37	0.320555
1238.3	0.318747
1240.23	0.316999
1242.15	0.31567
1244.08	0.314737
1246.01	0.314184
1247.94	0.313991
1249.87	0.313859
1251.8	0.313517
1253.73	0.312636
1255.66	0.311229
1257.59	0.309794
1259.51	0.308537
1261.44	0.307529
1263.37	0.306826
1265.3	0.306306
1267.23	0.305921
1269.16	0.305453
1271.09	0.304566
1273.02	0.303198
1274.94	0.301541
1276.87	0.2999
1278.8	0.298529
1280.73	0.297595
1282.66	0.297145
1284.59	0.296942
1286.52	0.296625
1288.45	0.296066
1290.37	0.295186
1292.3	0.293864
1294.23	0.292313
1296.16	0.290905
1298.09	0.289921
1300.02	0.28957
1301.95	0.289697
1303.88	0.289854
1305.81	0.289694
1307.73	0.289164
1309.66	0.288208
1311.59	0.286795
1313.52	0.285473
1315.45	0.284613
1317.38	0.284004
1319.31	0.28386
1321.24	0.284291
1323.16	0.284674
1325.09	0.284507
1327.02	0.283771
1328.95	0.282694
1330.88	0.281489
1332.81	0.280331
1334.74	0.279479
1336.67	0.278884
1338.6	0.278434
1340.52	0.278749
1342.45	0.279622
1344.38	0.279807
1346.31	0.279221
1348.24	0.278344
1350.17	0.277386
1352.1	0.276606
1354.03	0.276193
1355.95	0.276323
1357.88	0.276726
1359.81	0.276607
1361.74	0.275874
1363.67	0.275948
1365.6	0.276506
1367.53	0.275972
1369.46	0.27557
1371.38	0.27564
1373.31	0.275588
1375.24	0.277005
1377.17	0.279449
1379.1	0.281225
1381.03	0.283201
1382.96	0.285618
1384.89	0.285215
1386.82	0.28137
1388.74	0.279267
1390.67	0.279858
1392.6	0.279351
1394.53	0.279249
1396.46	0.281669
1398.39	0.284339
1400.32	0.287919
1402.25	0.292153
1404.17	0.295775
1406.1	0.301705
1408.03	0.309706
1409.96	0.316096
1411.89	0.319084
1413.82	0.31914
1415.75	0.3163
1417.68	0.30976
1419.61	0.303321
1421.53	0.299973
1423.46	0.295592
1425.39	0.291035
1427.32	0.288127
1429.25	0.285287
1431.18	0.284561
1433.11	0.285321
1435.04	0.283624
1436.96	0.28331
1438.89	0.288458
1440.82	0.293881
1442.75	0.299653
1444.68	0.30616
1446.61	0.309649
1448.54	0.311191
1450.47	0.313979
1452.4	0.31933
1454.32	0.323876
1456.25	0.323159
1458.18	0.321588
1460.11	0.322288
1462.04	0.321697
1463.97	0.321108
1465.9	0.320938
1467.83	0.317926
1469.75	0.310709
1471.68	0.301777
1473.61	0.296694
1475.54	0.294925
1477.47	0.293034
1479.4	0.290639
1481.33	0.287892
1483.26	0.285813
1485.18	0.283914
1487.11	0.281351
1489.04	0.279027
1490.97	0.279199
1492.9	0.280717
1494.83	0.278776
1496.76	0.275444
1498.69	0.275272
1500.62	0.276087
1502.54	0.275567
1504.47	0.270313
1506.4	0.263583
1508.33	0.266202
1510.26	0.270417
1512.19	0.271088
1514.12	0.269862
1516.05	0.266905
1517.97	0.2646
1519.9	0.261767
1521.83	0.259898
1523.76	0.262529
1525.69	0.264274
1527.62	0.265208
1529.55	0.26687
1531.48	0.265191
1533.41	0.26217
1535.33	0.262791
1537.26	0.260784
1539.19	0.253902
1541.12	0.253445
1543.05	0.258045
1544.98	0.261354
1546.91	0.263737
1548.84	0.263681
1550.76	0.262407
1552.69	0.260105
1554.62	0.257084
1556.55	0.252415
1558.48	0.245395
1560.41	0.249348
1562.34	0.258122
1564.27	0.260363
1566.19	0.260745
1568.12	0.259431
1570.05	0.257898
1571.98	0.259996
1573.91	0.258875
1575.84	0.255119
1577.77	0.257393
1579.7	0.261001
1581.63	0.261747
1583.55	0.261877
1585.48	0.261923
1587.41	0.261577
1589.34	0.260873
1591.27	0.259998
1593.2	0.259368
1595.13	0.259176
1597.06	0.259678
1598.98	0.260524
1600.91	0.261126
1602.84	0.261632
1604.77	0.261912
1606.7	0.261657
1608.63	0.260954
1610.56	0.260313
1612.49	0.260184
1614.42	0.25827
1616.34	0.255394
1618.27	0.257949
1620.2	0.261223
1622.13	0.260231
1624.06	0.259846
1625.99	0.260986
1627.92	0.260617
1629.85	0.26081
1631.77	0.260886
1633.7	0.256898
1635.63	0.253114
1637.56	0.256498
1639.49	0.260331
1641.42	0.261044
1643.35	0.259956
1645.28	0.255426
1647.2	0.252565
1649.13	0.254757
1651.06	0.2509
1652.99	0.243609
1654.92	0.249556
1656.85	0.256844
1658.78	0.258407
1660.71	0.257332
1662.64	0.255454
1664.56	0.255818
1666.49	0.255466
1668.42	0.251321
1670.35	0.250025
1672.28	0.251745
1674.21	0.25085
1676.14	0.251368
1678.07	0.254009
1679.99	0.254073
1681.92	0.2503
1683.85	0.244767
1685.78	0.246343
1687.71	0.250527
1689.64	0.250805
1691.57	0.252022
1693.5	0.250705
1695.43	0.247251
1697.35	0.247392
1699.28	0.244754
1701.21	0.244863
1703.14	0.249728
1705.07	0.24994
1707	0.250093
1708.93	0.252246
1710.86	0.25294
1712.78	0.252599
1714.71	0.250626
1716.64	0.247884
1718.57	0.248915
1720.5	0.252733
1722.43	0.253752
1724.36	0.253219
1726.29	0.253474
1728.22	0.253026
1730.14	0.252732
1732.07	0.250372
1734	0.247614
1735.93	0.25138
1737.86	0.253573
1739.79	0.251783
1741.72	0.251654
1743.65	0.251857
1745.57	0.25125
1747.5	0.2506
1749.43	0.249175
1751.36	0.249367
1753.29	0.251694
1755.22	0.251682
1757.15	0.250268
1759.08	0.249683
1761	0.247791
1762.93	0.247442
1764.86	0.248831
1766.79	0.248152
1768.72	0.247401
1770.65	0.246151
1772.58	0.244912
1774.51	0.246973
1776.44	0.248545
1778.36	0.247757
1780.29	0.246823
1782.22	0.246684
1784.15	0.246722
1786.08	0.247144
1788.01	0.248001
1789.94	0.246872
1791.87	0.244665
1793.79	0.245205
1795.72	0.246522
1797.65	0.246016
1799.58	0.244865
1801.51	0.24481
1803.44	0.245898
1805.37	0.246833
1807.3	0.247103
1809.23	0.246766
1811.15	0.24647
1813.08	0.246615
1815.01	0.246373
1816.94	0.245834
1818.87	0.245675
1820.8	0.245932
1822.73	0.245552
1824.66	0.244887
1826.58	0.245266
1828.51	0.244842
1830.44	0.244251
1832.37	0.245294
1834.3	0.245672
1836.23	0.245073
1838.16	0.244977
1840.09	0.245212
1842.01	0.244008
1843.94	0.242339
1845.87	0.243601
1847.8	0.24534
1849.73	0.245512
1851.66	0.24544
1853.59	0.245128
1855.52	0.244831
1857.45	0.244789
1859.37	0.244908
1861.3	0.245189
1863.23	0.245438
1865.16	0.245309
1867.09	0.244023
1869.02	0.243003
1870.95	0.243902
1872.88	0.244764
1874.8	0.244728
1876.73	0.244884
1878.66	0.245228
1880.59	0.245582
1882.52	0.24584
1884.45	0.245937
1886.38	0.245789
1888.31	0.244954
1890.24	0.244511
1892.16	0.244933
1894.09	0.244983
1896.02	0.245076
1897.95	0.245613
1899.88	0.245976
1901.81	0.246168
1903.74	0.246275
1905.67	0.246118
1907.59	0.245655
1909.52	0.245287
1911.45	0.245281
1913.38	0.245563
1915.31	0.245453
1917.24	0.244942
1919.17	0.24548
1921.1	0.246255
1923.03	0.246213
1924.95	0.246402
1926.88	0.246425
1928.81	0.245964
1930.74	0.245744
1932.67	0.245736
1934.6	0.245905
1936.53	0.246195
1938.46	0.24637
1940.38	0.246024
1942.31	0.24541
1944.24	0.245386
1946.17	0.245591
1948.1	0.245545
1950.03	0.245537
1951.96	0.245739
1953.89	0.24608
1955.81	0.24645
1957.74	0.246782
1959.67	0.246831
1961.6	0.246681
1963.53	0.246557
1965.46	0.24624
1967.39	0.246106
1969.32	0.246614
1971.25	0.247321
1973.17	0.248088
1975.1	0.24901
1977.03	0.250002
1978.96	0.251331
1980.89	0.253218
1982.82	0.25563
1984.75	0.258018
1986.68	0.259523
1988.6	0.259973
1990.53	0.259686
1992.46	0.259324
1994.39	0.259349
1996.32	0.259466
1998.25	0.25971
2000.18	0.260227
2002.11	0.260607
2004.04	0.260468
2005.96	0.259766
2007.89	0.258833
2009.82	0.258045
2011.75	0.257421
2013.68	0.256723
2015.61	0.255885
2017.54	0.255252
2019.47	0.254883
2021.39	0.254506
2023.32	0.254159
2025.25	0.253926
2027.18	0.25381
2029.11	0.253863
2031.04	0.253989
2032.97	0.253964
2034.9	0.253718
2036.82	0.253426
2038.75	0.253213
2040.68	0.253167
2042.61	0.253438
2044.54	0.253972
2046.47	0.254583
2048.4	0.255007
2050.33	0.255146
2052.26	0.255079
2054.18	0.254723
2056.11	0.254268
2058.04	0.254075
2059.97	0.254175
2061.9	0.254539
2063.83	0.25517
2065.76	0.255986
2067.69	0.256746
2069.61	0.257289
2071.54	0.257794
2073.47	0.258237
2075.4	0.258444
2077.33	0.258478
2079.26	0.258315
2081.19	0.257988
2083.12	0.257754
2085.05	0.257675
2086.97	0.257515
2088.9	0.257162
2090.83	0.256729
2092.76	0.256231
2094.69	0.255668
2096.62	0.255141
2098.55	0.254782
2100.48	0.254712
2102.4	0.254817
2104.33	0.254945
2106.26	0.255057
2108.19	0.255092
2110.12	0.254957
2112.05	0.254576
2113.98	0.254163
2115.91	0.253932
2117.83	0.253874
2119.76	0.254067
2121.69	0.254434
2123.62	0.254801
2125.55	0.255089
2127.48	0.25517
2129.41	0.255027
2131.34	0.254738
2133.27	0.254389
2135.19	0.254155
2137.12	0.254251
2139.05	0.254661
2140.98	0.255129
2142.91	0.255553
2144.84	0.255802
2146.77	0.255679
2148.7	0.255314
2150.62	0.254941
2152.55	0.254641
2154.48	0.254456
2156.41	0.254446
2158.34	0.25454
2160.27	0.254633
2162.2	0.254629
2164.13	0.254405
2166.06	0.254034
2167.98	0.253573
2169.91	0.253002
2171.84	0.252477
2173.77	0.252215
2175.7	0.252387
2177.63	0.252881
2179.56	0.253317
2181.49	0.253527
2183.41	0.253512
2185.34	0.253224
2187.27	0.252745
2189.2	0.252278
2191.13	0.251999
2193.06	0.251998
2194.99	0.252197
2196.92	0.252534
2198.85	0.252867
2200.77	0.252987
2202.7	0.25291
2204.63	0.252548
2206.56	0.251928
2208.49	0.251472
2210.42	0.251337
2212.35	0.251377
2214.28	0.251572
2216.2	0.251897
2218.13	0.25214
2220.06	0.252119
2221.99	0.251853
2223.92	0.251498
2225.85	0.251178
2227.78	0.250958
2229.71	0.250933
2231.63	0.251126
2233.56	0.251475
2235.49	0.25181
2237.42	0.251951
2239.35	0.251937
2241.28	0.251759
2243.21	0.251384
2245.14	0.250998
2247.07	0.250837
2248.99	0.250986
2250.92	0.251269
2252.85	0.251549
2254.78	0.25184
2256.71	0.252033
2258.64	0.25199
2260.57	0.25173
2262.5	0.251407
2264.42	0.251195
2266.35	0.251157
2268.28	0.251304
2270.21	0.25162
2272.14	0.251982
2274.07	0.252265
2276	0.252375
2277.93	0.252309
2279.86	0.252174
2281.78	0.251987
2283.71	0.251817
2285.64	0.25177
2287.57	0.251838
2289.5	0.252061
2291.43	0.252319
2293.36	0.252393
2295.29	0.252237
2297.21	0.251882
2299.14	0.25148
2301.07	0.251122
2303	0.250742
2304.93	0.250405
2306.86	0.250151
2308.79	0.249896
2310.72	0.249535
2312.64	0.248947
2314.57	0.248169
2316.5	0.24722
2318.43	0.246084
2320.36	0.244925
2322.29	0.243974
2324.22	0.24346
2326.15	0.243155
2328.08	0.242673
2330	0.242153
2331.93	0.241801
2333.86	0.241543
2335.79	0.241156
2337.72	0.240673
2339.65	0.240435
2341.58	0.240692
2343.51	0.241427
2345.43	0.243221
2347.36	0.246221
2349.29	0.247571
2351.22	0.245413
2353.15	0.241934
2355.08	0.239396
2357.01	0.237718
2358.94	0.236797
2360.87	0.236609
2362.79	0.237126
2364.72	0.238186
2366.65	0.239486
2368.58	0.240971
2370.51	0.242563
2372.44	0.244289
2374.37	0.246239
2376.3	0.248305
2378.22	0.25024
2380.15	0.251884
2382.08	0.253195
2384.01	0.254162
2385.94	0.254774
2387.87	0.255058
2389.8	0.255118
2391.73	0.254974
2393.66	0.254737
2395.58	0.25462
2397.51	0.25463
2399.44	0.254769
2401.37	0.255063
2403.3	0.255374
2405.23	0.255539
2407.16	0.25555
2409.09	0.255475
2411.01	0.255301
2412.94	0.255161
2414.87	0.255188
2416.8	0.255277
2418.73	0.25545
2420.66	0.255712
2422.59	0.255925
2424.52	0.256017
2426.44	0.255928
2428.37	0.255734
2430.3	0.25559
2432.23	0.25553
2434.16	0.255564
2436.09	0.255716
2438.02	0.255968
2439.95	0.25622
2441.88	0.256415
2443.8	0.256481
2445.73	0.256337
2447.66	0.256155
2449.59	0.256047
2451.52	0.256045
2453.45	0.256231
2455.38	0.256488
2457.31	0.256813
2459.23	0.257176
2461.16	0.257302
2463.09	0.257271
2465.02	0.257266
2466.95	0.257193
2468.88	0.257056
2470.81	0.25705
2472.74	0.257238
2474.67	0.257426
2476.59	0.257569
2478.52	0.257727
2480.45	0.257794
2482.38	0.257755
2484.31	0.257642
2486.24	0.2575
2488.17	0.257479
2490.1	0.257611
2492.02	0.257845
2493.95	0.258131
2495.88	0.258364
2497.81	0.258447
2499.74	0.258428
2501.67	0.2584
2503.6	0.258359
2505.53	0.258343
2507.45	0.258379
2509.38	0.258449
2511.31	0.258572
2513.24	0.258707
2515.17	0.258851
2517.1	0.258969
2519.03	0.258952
2520.96	0.258869
2522.89	0.258829
2524.81	0.258816
2526.74	0.258834
2528.67	0.258909
2530.6	0.259013
2532.53	0.25909
2534.46	0.259143
2536.39	0.259188
2538.32	0.259202
2540.24	0.259154
2542.17	0.259072
2544.1	0.259027
2546.03	0.25905
2547.96	0.259167
2549.89	0.259355
2551.82	0.259508
2553.75	0.259581
2555.68	0.259628
2557.6	0.259628
2559.53	0.259574
2561.46	0.259555
2563.39	0.259581
2565.32	0.259658
2567.25	0.259822
2569.18	0.260004
2571.11	0.260176
2573.03	0.260332
2574.96	0.260413
2576.89	0.260411
2578.82	0.260333
2580.75	0.260257
2582.68	0.260289
2584.61	0.260372
2586.54	0.260418
2588.46	0.26055
2590.39	0.260783
2592.32	0.260956
2594.25	0.261096
2596.18	0.261141
2598.11	0.261012
2600.04	0.26086
2601.97	0.260714
2603.9	0.260704
2605.82	0.26092
2607.75	0.261123
2609.68	0.261303
2611.61	0.261525
2613.54	0.261638
2615.47	0.261609
2617.4	0.261512
2619.33	0.261369
2621.25	0.26125
2623.18	0.261293
2625.11	0.261489
2627.04	0.261777
2628.97	0.262135
2630.9	0.262418
2632.83	0.262475
2634.76	0.262302
2636.69	0.262054
2638.61	0.261917
2640.54	0.261868
2642.47	0.261971
2644.4	0.262352
2646.33	0.262738
2648.26	0.262947
2650.19	0.263075
2652.12	0.263027
2654.04	0.262854
2655.97	0.262726
2657.9	0.262612
2659.83	0.26261
2661.76	0.262838
2663.69	0.263249
2665.62	0.263687
2667.55	0.263968
2669.48	0.264018
2671.4	0.263764
2673.33	0.263433
2675.26	0.26333
2677.19	0.263356
2679.12	0.263517
2681.05	0.263867
2682.98	0.264221
2684.91	0.264477
2686.83	0.264632
2688.76	0.264673
2690.69	0.264528
2692.62	0.264233
2694.55	0.264036
2696.48	0.264075
2698.41	0.264315
2700.34	0.264705
2702.26	0.265086
2704.19	0.265291
2706.12	0.265339
2708.05	0.265246
2709.98	0.265047
2711.91	0.264849
2713.84	0.264718
2715.77	0.264848
2717.7	0.265226
2719.62	0.265545
2721.55	0.26578
2723.48	0.26598
2725.41	0.265992
2727.34	0.265826
2729.27	0.265692
2731.2	0.265554
2733.13	0.265409
2735.05	0.265586
2736.98	0.266026
2738.91	0.26641
2740.84	0.266655
2742.77	0.266692
2744.7	0.266571
2746.63	0.26637
2748.56	0.266189
2750.49	0.266215
2752.41	0.266375
2754.34	0.26656
2756.27	0.266853
2758.2	0.267264
2760.13	0.26758
2762.06	0.267606
2763.99	0.267444
2765.92	0.267265
2767.84	0.267187
2769.77	0.267237
2771.7	0.267362
2773.63	0.267628
2775.56	0.267952
2777.49	0.268226
2779.42	0.268464
2781.35	0.268478
2783.27	0.268267
2785.2	0.268091
2787.13	0.26803
2789.06	0.26817
2790.99	0.268494
2792.92	0.268802
2794.85	0.269046
2796.78	0.269253
2798.71	0.269432
2800.63	0.269561
2802.56	0.269571
2804.49	0.269517
2806.42	0.269523
2808.35	0.269647
2810.28	0.269882
2812.21	0.270173
2814.14	0.270458
2816.06	0.270666
2817.99	0.270775
2819.92	0.270886
2821.85	0.271013
2823.78	0.271075
2825.71	0.271229
2827.64	0.271584
2829.57	0.271971
2831.5	0.272359
2833.42	0.272772
2835.35	0.27317
2837.28	0.273684
2839.21	0.274439
2841.14	0.275415
2843.07	0.276683
2845	0.278427
2846.93	0.280714
2848.85	0.28296
2850.78	0.284033
2852.71	0.28374
2854.64	0.282923
2856.57	0.282069
2858.5	0.28123
2860.43	0.280444
2862.36	0.279857
2864.29	0.279525
2866.21	0.279361
2868.14	0.279363
2870.07	0.279423
2872	0.279516
2873.93	0.279692
2875.86	0.279733
2877.79	0.279534
2879.72	0.279257
2881.64	0.279101
2883.57	0.279139
2885.5	0.279405
2887.43	0.279873
2889.36	0.28039
2891.29	0.280913
2893.22	0.281378
2895.15	0.281758
2897.07	0.282166
2899	0.282616
2900.93	0.283138
2902.86	0.283707
2904.79	0.284336
2906.72	0.285283
2908.65	0.28662
2910.58	0.28832
2912.51	0.290511
2914.43	0.292885
2916.36	0.294701
2918.29	0.295721
2920.22	0.296066
2922.15	0.295833
2924.08	0.295356
2926.01	0.294812
2927.94	0.294132
2929.86	0.293267
2931.79	0.292217
2933.72	0.291033
2935.65	0.289754
2937.58	0.288675
2939.51	0.287895
2941.44	0.287178
2943.37	0.286727
2945.3	0.286682
2947.22	0.286763
2949.15	0.286796
2951.08	0.286834
2953.01	0.286983
2954.94	0.287112
2956.87	0.287088
2958.8	0.286944
2960.73	0.286728
2962.65	0.28653
2964.58	0.286222
2966.51	0.285628
2968.44	0.284842
2970.37	0.283918
2972.3	0.282959
2974.23	0.282222
2976.16	0.281705
2978.08	0.281248
2980.01	0.280908
2981.94	0.280817
2983.87	0.280748
2985.8	0.280434
2987.73	0.280134
2989.66	0.279806
2991.59	0.279237
2993.52	0.27889
2995.44	0.278866
2997.37	0.278834
2999.3	0.2788
3001.23	0.278836
3003.16	0.278898
3005.09	0.278883
3007.02	0.278765
3008.95	0.278531
3010.87	0.278265
3012.8	0.278123
3014.73	0.278142
3016.66	0.278352
3018.59	0.278601
3020.52	0.278818
3022.45	0.278992
3024.38	0.278987
3026.31	0.27891
3028.23	0.278748
3030.16	0.278527
3032.09	0.278484
3034.02	0.278629
3035.95	0.278894
3037.88	0.279112
3039.81	0.279219
3041.74	0.279333
3043.66	0.27943
3045.59	0.279444
3047.52	0.279357
3049.45	0.279277
3051.38	0.279321
3053.31	0.279466
3055.24	0.279706
3057.17	0.280016
3059.09	0.280245
3061.02	0.280266
3062.95	0.280149
3064.88	0.280011
3066.81	0.279988
3068.74	0.280151
3070.67	0.280346
3072.6	0.280483
3074.53	0.280539
3076.45	0.280575
3078.38	0.280778
3080.31	0.280924
3082.24	0.280829
3084.17	0.280827
3086.1	0.280951
3088.03	0.281009
3089.96	0.281104
3091.88	0.2813
3093.81	0.281549
3095.74	0.281725
3097.67	0.281729
3099.6	0.281669
3101.53	0.281632
3103.46	0.281664
3105.39	0.281702
3107.32	0.281748
3109.24	0.281975
3111.17	0.282209
3113.1	0.282314
3115.03	0.282421
3116.96	0.282498
3118.89	0.282603
3120.82	0.282778
3122.75	0.282893
3124.67	0.282923
3126.6	0.282965
3128.53	0.283165
3130.46	0.283451
3132.39	0.283692
3134.32	0.283957
3136.25	0.284095
3138.18	0.28404
3140.11	0.284102
3142.03	0.284232
3143.96	0.284222
3145.89	0.284259
3147.82	0.284446
3149.75	0.284688
3151.68	0.284954
3153.61	0.285254
3155.54	0.285485
3157.46	0.285488
3159.39	0.285453
3161.32	0.285554
3163.25	0.285607
3165.18	0.285661
3167.11	0.285929
3169.04	0.286342
3170.97	0.28666
3172.89	0.286754
3174.82	0.286786
3176.75	0.28688
3178.68	0.286888
3180.61	0.286846
3182.54	0.28697
3184.47	0.287175
3186.4	0.28735
3188.33	0.287602
3190.25	0.287915
3192.18	0.288151
3194.11	0.288198
3196.04	0.288101
3197.97	0.288061
3199.9	0.288183
3201.83	0.28846
3203.76	0.288843
3205.68	0.289169
3207.61	0.289368
3209.54	0.289615
3211.47	0.289774
3213.4	0.289698
3215.33	0.289693
3217.26	0.289698
3219.19	0.289687
3221.12	0.28997
3223.04	0.290322
3224.97	0.290617
3226.9	0.291044
3228.83	0.291297
3230.76	0.291186
3232.69	0.291099
3234.62	0.291229
3236.55	0.291449
3238.47	0.291652
3240.4	0.29186
3242.33	0.292167
3244.26	0.2924
3246.19	0.292602
3248.12	0.292967
3250.05	0.293136
3251.98	0.293047
3253.9	0.293057
3255.83	0.293155
3257.76	0.293361
3259.69	0.293746
3261.62	0.294043
3263.55	0.294205
3265.48	0.294373
3267.41	0.294354
3269.34	0.29427
3271.26	0.294397
3273.19	0.294504
3275.12	0.29466
3277.05	0.294976
3278.98	0.295159
3280.91	0.295322
3282.84	0.295599
3284.77	0.295822
3286.69	0.295944
3288.62	0.295862
3290.55	0.295683
3292.48	0.295733
3294.41	0.295989
3296.34	0.296354
3298.27	0.296838
3300.2	0.297162
3302.13	0.297069
3304.05	0.296935
3305.98	0.297129
3307.91	0.297399
3309.84	0.297601
3311.77	0.297832
3313.7	0.298078
3315.63	0.298318
3317.56	0.298496
3319.48	0.298729
3321.41	0.299067
3323.34	0.299172
3325.27	0.299105
3327.2	0.299302
3329.13	0.299653
3331.06	0.299896
3332.99	0.300129
3334.92	0.300404
3336.84	0.300779
3338.77	0.301172
3340.7	0.301346
3342.63	0.301507
3344.56	0.301715
3346.49	0.301772
3348.42	0.301936
3350.35	0.302343
3352.27	0.302735
3354.2	0.303023
3356.13	0.30331
3358.06	0.303527
3359.99	0.303584
3361.92	0.303695
3363.85	0.303878
3365.78	0.303981
3367.7	0.304193
3369.63	0.304565
3371.56	0.304945
3373.49	0.305314
3375.42	0.30553
3377.35	0.305631
3379.28	0.305849
3381.21	0.306045
3383.14	0.306162
3385.06	0.306318
3386.99	0.306494
3388.92	0.306729
3390.85	0.306956
3392.78	0.30722
3394.71	0.307523
3396.64	0.307548
3398.57	0.307515
3400.49	0.307783
3402.42	0.308091
3404.35	0.308343
3406.28	0.30863
3408.21	0.308776
3410.14	0.308841
3412.07	0.309065
3414	0.30932
3415.93	0.309438
3417.85	0.309501
3419.78	0.30952
3421.71	0.309532
3423.64	0.309683
3425.57	0.309926
3427.5	0.310125
3429.43	0.310276
3431.36	0.31035
3433.28	0.310344
3435.21	0.310303
3437.14	0.310301
3439.07	0.310413
3441	0.310543
3442.93	0.310627
3444.86	0.310599
3446.79	0.310464
3448.71	0.310522
3450.64	0.310652
3452.57	0.310541
3454.5	0.310374
3456.43	0.310357
3458.36	0.310431
3460.29	0.310412
3462.22	0.310315
3464.15	0.310241
3466.07	0.310152
3468	0.310163
3469.93	0.31021
3471.86	0.310085
3473.79	0.309875
3475.72	0.309779
3477.65	0.309863
3479.58	0.309854
3481.5	0.309735
3483.43	0.309795
3485.36	0.309775
3487.29	0.309656
3489.22	0.309738
3491.15	0.309668
3493.08	0.3094
3495.01	0.309325
3496.94	0.309333
3498.86	0.309265
3500.79	0.30903
3502.72	0.308725
3504.65	0.308712
3506.58	0.308691
3508.51	0.30836
3510.44	0.30815
3512.37	0.308242
3514.29	0.308322
3516.22	0.308186
3518.15	0.308046
3520.08	0.307887
3522.01	0.307439
3523.94	0.307091
3525.87	0.307063
3527.8	0.307079
3529.72	0.30734
3531.65	0.307953
3533.58	0.30854
3535.51	0.309034
3537.44	0.30975
3539.37	0.310742
3541.3	0.311728
3543.23	0.31188
3545.16	0.310739
3547.08	0.309683
3549.01	0.309236
3550.94	0.308404
3552.87	0.307899
3554.8	0.308508
3556.73	0.309616
3558.66	0.311381
3560.59	0.314965
3562.51	0.321379
3564.44	0.330693
3566.37	0.345442
3568.3	0.37071
3570.23	0.399595
3572.16	0.410772
3574.09	0.393142
3576.02	0.362845
3577.95	0.33855
3579.87	0.323231
3581.8	0.314175
3583.73	0.308604
3585.66	0.30374
3587.59	0.30016
3589.52	0.299859
3591.45	0.300128
3593.38	0.298909
3595.3	0.298141
3597.23	0.298281
3599.16	0.297953
3601.09	0.297536
3603.02	0.297763
3604.95	0.297517
3606.88	0.295786
3608.81	0.29445
3610.74	0.294589
3612.66	0.294435
3614.59	0.294699
3616.52	0.294641
3618.45	0.29298
3620.38	0.293186
3622.31	0.295043
3624.24	0.295746
3626.17	0.293809
3628.09	0.28959
3630.02	0.2898
3631.95	0.293617
3633.88	0.294828
3635.81	0.295233
3637.74	0.295935
3639.67	0.295972
3641.6	0.295961
3643.52	0.295842
3645.45	0.294139
3647.38	0.290341
3649.31	0.287607
3651.24	0.290058
3653.17	0.293531
3655.1	0.293201
3657.03	0.292847
3658.96	0.294693
3660.88	0.295399
3662.81	0.29501
3664.74	0.294747
3666.67	0.29369
3668.6	0.290318
3670.53	0.288596
3672.46	0.289906
3674.39	0.287759
3676.31	0.286749
3678.24	0.290839
3680.17	0.293003
3682.1	0.293526
3684.03	0.293886
3685.96	0.29212
3687.89	0.288875
3689.82	0.288251
3691.75	0.290991
3693.67	0.293337
3695.6	0.294172
3697.53	0.294385
3699.46	0.293802
3701.39	0.292688
3703.32	0.293217
3705.25	0.294286
3707.18	0.293447
3709.1	0.291309
3711.03	0.289414
3712.96	0.290711
3714.89	0.29378
3716.82	0.294685
3718.75	0.294112
3720.68	0.293401
3722.61	0.293055
3724.53	0.292623
3726.46	0.292578
3728.39	0.293516
3730.32	0.292818
3732.25	0.290414
3734.18	0.288927
3736.11	0.28907
3738.04	0.291145
3739.97	0.293425
3741.89	0.291564
3743.82	0.286809
3745.75	0.287809
3747.68	0.290335
3749.61	0.287988
3751.54	0.287822
3753.47	0.291911
3755.4	0.29466
3757.32	0.29487
3759.25	0.294274
3761.18	0.295561
3763.11	0.296418
3765.04	0.295647
3766.97	0.295412
3768.9	0.294995
3770.83	0.295373
3772.76	0.297065
3774.68	0.297806
3776.61	0.297309
3778.54	0.296261
3780.47	0.29642
3782.4	0.297494
3784.33	0.297425
3786.26	0.297536
3788.19	0.298294
3790.11	0.298394
3792.04	0.298506
3793.97	0.297704
3795.9	0.296199
3797.83	0.2963
3799.76	0.294622
3801.69	0.292814
3803.62	0.295336
3805.55	0.295509
3807.47	0.294719
3809.4	0.297242
3811.33	0.298722
3813.26	0.297355
3815.19	0.29438
3817.12	0.294309
3819.05	0.294884
3820.98	0.29301
3822.9	0.29508
3824.83	0.297706
3826.76	0.297423
3828.69	0.297714
3830.62	0.297203
3832.55	0.296174
3834.48	0.295634
3836.41	0.293835
3838.33	0.293216
3840.26	0.295176
3842.19	0.296509
3844.12	0.297422
3846.05	0.298782
3847.98	0.299111
3849.91	0.297159
3851.84	0.291745
3853.77	0.287976
3855.69	0.293271
3857.62	0.298247
3859.55	0.298771
3861.48	0.298014
3863.41	0.296671
3865.34	0.296787
3867.27	0.297411
3869.2	0.295744
3871.12	0.29604
3873.05	0.297951
3874.98	0.298804
3876.91	0.30014
3878.84	0.299396
3880.77	0.298193
3882.7	0.299079
3884.63	0.298135
3886.56	0.297997
3888.48	0.299681
3890.41	0.298915
3892.34	0.298679
3894.27	0.300585
3896.2	0.30087
3898.13	0.299132
3900.06	0.297594
3901.99	0.297097
3903.91	0.29733
3905.84	0.299053
3907.77	0.301166
3909.7	0.301854
3911.63	0.302024
3913.56	0.302125
3915.49	0.301362
3917.42	0.300455
3919.34	0.300721
3921.27	0.301463
3923.2	0.301419
3925.13	0.301434
3927.06	0.302144
3928.99	0.302342
3930.92	0.301761
3932.85	0.301651
3934.78	0.302231
3936.7	0.302651
3938.63	0.30288
3940.56	0.302629
3942.49	0.302014
3944.42	0.302311
3946.35	0.302846
3948.28	0.302658
3950.21	0.302686
3952.13	0.303135
3954.06	0.303425
3955.99	0.303491
3957.92	0.303475
3959.85	0.303463
3961.78	0.303494
3963.71	0.303642
3965.64	0.303775
3967.57	0.303921
3969.49	0.304218
3971.42	0.304295
3973.35	0.304111
3975.28	0.304117
3977.21	0.304359
3979.14	0.304513
3981.07	0.304357
3983	0.304312
3984.92	0.304725
3986.85	0.305013
3988.78	0.304934
3990.71	0.304968
3992.64	0.305128
3994.57	0.305128
3996.5	0.305038
3998.43	0.305028
4000.35	0.305156
