# Supplementary material for: Development, physicochemical characterization and in-vitro biocompatibility study of dromedary camel dentine derived hydroxyapatite for bone repair
Source: PeerJ. 2023 Aug 3;11:e15711. doi: 10.7717/peerj.15711 (PMC10404400; doi:10.7717/peerj.15711)
Supplement: Supplemental Information 2 [file peerj-11-15711-s002.xlsx]

## Sheet: S4_Theta_2-Theta
#twotheta	ycal			S4
10	14.0672	25.3949	37.0214	-0.305977
10.02	14.066	25.3949	37.0214	-0.30601
10.04	14.067	25.3949	37.0214	-0.305984
10.06	14.0702	25.3949	37.0214	-0.305896
10.08	14.0759	25.3949	37.0214	-0.305744
10.1	14.0841	25.3949	37.0214	-0.305522
10.12	14.0951	25.3949	37.0214	-0.305225
10.14	14.1089	25.3949	37.0214	-0.304851
10.16	14.1259	25.3949	37.0214	-0.304393
10.18	14.1462	25.3949	37.0214	-0.303845
10.2	14.17	25.3949	37.0214	-0.303201
10.22	14.1977	25.3949	37.0214	-0.302454
10.24	14.2295	25.3949	37.0214	-0.301595
10.26	14.2657	25.3949	37.0214	-0.300617
10.28	14.3067	25.3949	37.0214	-0.299508
10.3	14.3529	25.3949	37.0214	-0.298259
10.32	14.4048	25.3949	37.0214	-0.296858
10.34	14.4629	25.3949	37.0214	-0.295289
10.36	14.5277	25.3949	37.0214	-0.293539
10.38	14.5999	25.3949	37.0214	-0.291589
10.4	14.6802	25.3949	37.0214	-0.289421
10.42	14.7694	25.3949	37.0214	-0.287011
10.44	14.8684	25.3949	37.0214	-0.284335
10.46	14.9784	25.3949	37.0214	-0.281366
10.48	15.1004	25.3949	37.0214	-0.278069
10.5	15.2359	25.3949	37.0214	-0.274408
10.52	15.3864	25.3949	37.0214	-0.270343
10.54	15.5537	25.3949	37.0214	-0.265826
10.56	15.7396	25.3949	37.0214	-0.260804
10.58	15.9464	25.3949	37.0214	-0.255219
10.6	16.1763	25.3949	37.0214	-0.249007
10.62	16.432	25.3949	37.0214	-0.242101
10.64	16.7159	25.3949	37.0214	-0.234433
10.66	17.0305	25.3949	37.0214	-0.225935
10.68	17.3781	25.3949	37.0214	-0.216546
10.7	17.7603	25.3949	37.0214	-0.206221
10.72	18.1784	25.3949	37.0214	-0.194929
10.74	18.6323	25.3949	37.0214	-0.182667
10.76	19.1214	25.3949	37.0214	-0.169457
10.78	19.6439	25.3949	37.0214	-0.155343
10.8	20.198	25.3949	37.0214	-0.140375
10.82	20.7828	25.3949	37.0214	-0.12458
10.84	21.3997	25.3949	37.0214	-0.107917
10.86	22.0553	25.3949	37.0214	-0.0902073
10.88	22.7642	25.3949	37.0214	-0.0710595
10.9	23.5519	25.3949	37.0214	-0.0497837
10.92	24.4572	25.3949	37.0214	-0.0253281
10.94	25.5331	25.3949	37.0214	0.00373151
10.96	26.8424	25.3949	37.0214	0.039097
10.98	28.4482	25.3949	37.0214	0.0824737
11	30.3946	25.3949	37.0214	0.135047
11.02	32.6761	25.3949	37.0214	0.196675
11.04	35.2011	25.3949	37.0214	0.264879
11.06	37.7608	25.3949	37.0214	0.33402
11.08	40.0303	25.3949	37.0214	0.395321
11.1	41.6281	25.3949	37.0214	0.438481
11.12	41.5548	25.3949	37.0214	0.4365
11.14	36.1558	25.3949	37.0214	0.290666
11.16	29.3344	25.3949	37.0214	0.10641
11.18	23.766	25.3949	37.0214	-0.0440011
11.2	20.3303	25.3949	37.0214	-0.136803
11.22	18.1094	25.3949	37.0214	-0.196793
11.24	16.5613	25.3949	37.0214	-0.238608
11.26	15.47	25.3949	37.0214	-0.268086
11.28	14.7022	25.3949	37.0214	-0.288827
11.3	14.1544	25.3949	37.0214	-0.303622
11.32	13.7537	25.3949	37.0214	-0.314446
11.34	13.4525	25.3949	37.0214	-0.322581
11.36	13.2207	25.3949	37.0214	-0.328843
11.38	13.0384	25.3949	37.0214	-0.333766
11.4	12.8926	25.3949	37.0214	-0.337705
11.42	12.7741	25.3949	37.0214	-0.340906
11.44	12.6766	25.3949	37.0214	-0.34354
11.46	12.5954	25.3949	37.0214	-0.345733
11.48	12.5272	25.3949	37.0214	-0.347576
11.5	12.4693	25.3949	37.0214	-0.34914
11.52	12.4199	25.3949	37.0214	-0.350474
11.54	12.3774	25.3949	37.0214	-0.351621
11.56	12.3408	25.3949	37.0214	-0.352611
11.58	12.309	25.3949	37.0214	-0.353469
11.6	12.2814	25.3949	37.0214	-0.354215
11.62	12.2573	25.3949	37.0214	-0.354866
11.64	12.2363	25.3949	37.0214	-0.355434
11.66	12.2179	25.3949	37.0214	-0.35593
11.68	12.2019	25.3949	37.0214	-0.356362
11.7	12.188	25.3949	37.0214	-0.356738
11.72	12.1759	25.3949	37.0214	-0.357065
11.74	12.1654	25.3949	37.0214	-0.357347
11.76	12.1565	25.3949	37.0214	-0.357589
11.78	12.1489	25.3949	37.0214	-0.357794
11.8	12.1425	25.3949	37.0214	-0.357967
11.82	12.1372	25.3949	37.0214	-0.358109
11.84	12.133	25.3949	37.0214	-0.358222
11.86	12.1298	25.3949	37.0214	-0.35831
11.88	12.1274	25.3949	37.0214	-0.358374
11.9	12.1259	25.3949	37.0214	-0.358416
11.92	12.1251	25.3949	37.0214	-0.358436
11.94	12.1251	25.3949	37.0214	-0.358437
11.96	12.1258	25.3949	37.0214	-0.358419
11.98	12.1271	25.3949	37.0214	-0.358383
12	12.129	25.3949	37.0214	-0.35833
12.02	12.1316	25.3949	37.0214	-0.358261
12.04	12.1347	25.3949	37.0214	-0.358177
12.06	12.1384	25.3949	37.0214	-0.358078
12.08	12.1425	25.3949	37.0214	-0.357965
12.1	12.1472	25.3949	37.0214	-0.357839
12.12	12.1524	25.3949	37.0214	-0.357699
12.14	12.1581	25.3949	37.0214	-0.357546
12.16	12.1642	25.3949	37.0214	-0.357381
12.18	12.1707	25.3949	37.0214	-0.357205
12.2	12.1777	25.3949	37.0214	-0.357016
12.22	12.1851	25.3949	37.0214	-0.356816
12.24	12.1929	25.3949	37.0214	-0.356606
12.26	12.2011	25.3949	37.0214	-0.356384
12.28	12.2097	25.3949	37.0214	-0.356152
12.3	12.2186	25.3949	37.0214	-0.35591
12.32	12.228	25.3949	37.0214	-0.355657
12.34	12.2377	25.3949	37.0214	-0.355395
12.36	12.2478	25.3949	37.0214	-0.355123
12.38	12.2582	25.3949	37.0214	-0.354842
12.4	12.269	25.3949	37.0214	-0.354551
12.42	12.2801	25.3949	37.0214	-0.354251
12.44	12.2915	25.3949	37.0214	-0.353942
12.46	12.3033	25.3949	37.0214	-0.353624
12.48	12.3154	25.3949	37.0214	-0.353297
12.5	12.3278	25.3949	37.0214	-0.352961
12.52	12.3405	25.3949	37.0214	-0.352617
12.54	12.3536	25.3949	37.0214	-0.352265
12.56	12.3669	25.3949	37.0214	-0.351904
12.58	12.3806	25.3949	37.0214	-0.351535
12.6	12.3946	25.3949	37.0214	-0.351158
12.62	12.4088	25.3949	37.0214	-0.350773
12.64	12.4233	25.3949	37.0214	-0.35038
12.66	12.4382	25.3949	37.0214	-0.34998
12.68	12.4533	25.3949	37.0214	-0.349571
12.7	12.4687	25.3949	37.0214	-0.349155
12.72	12.4844	25.3949	37.0214	-0.348732
12.74	12.5003	25.3949	37.0214	-0.348301
12.76	12.5166	25.3949	37.0214	-0.347862
12.78	12.5331	25.3949	37.0214	-0.347416
12.8	12.5499	25.3949	37.0214	-0.346963
12.82	12.5669	25.3949	37.0214	-0.346502
12.84	12.5842	25.3949	37.0214	-0.346035
12.86	12.6018	25.3949	37.0214	-0.345561
12.88	12.6196	25.3949	37.0214	-0.345079
12.9	12.6377	25.3949	37.0214	-0.344591
12.92	12.656	25.3949	37.0214	-0.344095
12.94	12.6746	25.3949	37.0214	-0.343594
12.96	12.6935	25.3949	37.0214	-0.343085
12.98	12.7125	25.3949	37.0214	-0.342569
13	12.7318	25.3949	37.0214	-0.342047
13.02	12.7514	25.3949	37.0214	-0.341519
13.04	12.7712	25.3949	37.0214	-0.340984
13.06	12.7913	25.3949	37.0214	-0.340442
13.08	12.8116	25.3949	37.0214	-0.339895
13.1	12.8321	25.3949	37.0214	-0.339341
13.12	12.8528	25.3949	37.0214	-0.33878
13.14	12.8738	25.3949	37.0214	-0.338214
13.16	12.895	25.3949	37.0214	-0.337641
13.18	12.9164	25.3949	37.0214	-0.337062
13.2	12.9381	25.3949	37.0214	-0.336478
13.22	12.9599	25.3949	37.0214	-0.335887
13.24	12.982	25.3949	37.0214	-0.33529
13.26	12.994	25.3949	37.0214	-0.334967
13.28	13.0167	25.3949	37.0214	-0.334353
13.3	13.0345	25.3949	37.0214	-0.333871
13.32	13.0578	25.3949	37.0214	-0.333244
13.34	13.0812	25.3949	37.0214	-0.332611
13.36	13.1048	25.3949	37.0214	-0.331973
13.38	13.1286	25.3949	37.0214	-0.33133
13.4	13.1527	25.3949	37.0214	-0.330681
13.42	13.1769	25.3949	37.0214	-0.330027
13.44	13.2013	25.3949	37.0214	-0.329367
13.46	13.2259	25.3949	37.0214	-0.328702
13.48	13.2507	25.3949	37.0214	-0.328033
13.5	13.2757	25.3949	37.0214	-0.327358
13.52	13.3009	25.3949	37.0214	-0.326678
13.54	13.3262	25.3949	37.0214	-0.325993
13.56	13.3518	25.3949	37.0214	-0.325303
13.58	13.3775	25.3949	37.0214	-0.324608
13.6	13.4034	25.3949	37.0214	-0.323908
13.62	13.4295	25.3949	37.0214	-0.323203
13.64	13.4558	25.3949	37.0214	-0.322494
13.66	13.4822	25.3949	37.0214	-0.321779
13.68	13.5088	25.3949	37.0214	-0.32106
13.7	13.5356	25.3949	37.0214	-0.320336
13.72	13.5626	25.3949	37.0214	-0.319608
13.74	13.5897	25.3949	37.0214	-0.318875
13.76	13.617	25.3949	37.0214	-0.318138
13.78	13.6445	25.3949	37.0214	-0.317395
13.8	13.6721	25.3949	37.0214	-0.316649
13.82	13.6999	25.3949	37.0214	-0.315898
13.84	13.7279	25.3949	37.0214	-0.315143
13.86	13.756	25.3949	37.0214	-0.314383
13.88	13.7843	25.3949	37.0214	-0.313619
13.9	13.8127	25.3949	37.0214	-0.312851
13.92	13.8414	25.3949	37.0214	-0.312078
13.94	13.8701	25.3949	37.0214	-0.311302
13.96	13.899	25.3949	37.0214	-0.310521
13.98	13.9281	25.3949	37.0214	-0.309736
14	13.9573	25.3949	37.0214	-0.308947
14.02	13.9866	25.3949	37.0214	-0.308154
14.04	14.0161	25.3949	37.0214	-0.307358
14.06	14.0458	25.3949	37.0214	-0.306557
14.08	14.0755	25.3949	37.0214	-0.305752
14.1	14.1055	25.3949	37.0214	-0.304944
14.12	14.1355	25.3949	37.0214	-0.304132
14.14	14.1657	25.3949	37.0214	-0.303316
14.16	14.1961	25.3949	37.0214	-0.302497
14.18	14.2266	25.3949	37.0214	-0.301673
14.2	14.2572	25.3949	37.0214	-0.300846
14.22	14.2879	25.3949	37.0214	-0.300016
14.24	14.3188	25.3949	37.0214	-0.299182
14.26	14.3498	25.3949	37.0214	-0.298345
14.28	14.3809	25.3949	37.0214	-0.297504
14.3	14.4122	25.3949	37.0214	-0.29666
14.32	14.4435	25.3949	37.0214	-0.295812
14.34	14.475	25.3949	37.0214	-0.294961
14.36	14.5067	25.3949	37.0214	-0.294107
14.38	14.5384	25.3949	37.0214	-0.29325
14.4	14.5702	25.3949	37.0214	-0.29239
14.42	14.6022	25.3949	37.0214	-0.291526
14.44	14.6343	25.3949	37.0214	-0.290659
14.46	14.6665	25.3949	37.0214	-0.28979
14.48	14.6988	25.3949	37.0214	-0.288917
14.5	14.7312	25.3949	37.0214	-0.288041
14.52	14.7637	25.3949	37.0214	-0.287163
14.54	14.7964	25.3949	37.0214	-0.286282
14.56	14.8291	25.3949	37.0214	-0.285397
14.58	14.862	25.3949	37.0214	-0.28451
14.6	14.8949	25.3949	37.0214	-0.283621
14.62	14.9279	25.3949	37.0214	-0.282728
14.64	14.9611	25.3949	37.0214	-0.281833
14.66	14.9943	25.3949	37.0214	-0.280936
14.68	15.0276	25.3949	37.0214	-0.280035
14.7	15.061	25.3949	37.0214	-0.279132
14.72	15.0946	25.3949	37.0214	-0.278227
14.74	15.1282	25.3949	37.0214	-0.27732
14.76	15.1618	25.3949	37.0214	-0.27641
14.78	15.1956	25.3949	37.0214	-0.275497
14.8	15.2295	25.3949	37.0214	-0.274583
14.82	15.2634	25.3949	37.0214	-0.273666
14.84	15.2975	25.3949	37.0214	-0.272747
14.86	15.3316	25.3949	37.0214	-0.271825
14.88	15.3658	25.3949	37.0214	-0.270902
14.9	15.4	25.3949	37.0214	-0.269976
14.92	15.4344	25.3949	37.0214	-0.269049
14.94	15.4688	25.3949	37.0214	-0.268119
14.96	15.5032	25.3949	37.0214	-0.267188
14.98	15.5378	25.3949	37.0214	-0.266255
15	15.5724	25.3949	37.0214	-0.265319
15.02	15.6071	25.3949	37.0214	-0.264382
15.04	15.6419	25.3949	37.0214	-0.263443
15.06	15.6767	25.3949	37.0214	-0.262503
15.08	15.7116	25.3949	37.0214	-0.261561
15.1	15.7465	25.3949	37.0214	-0.260617
15.12	15.7815	25.3949	37.0214	-0.259671
15.14	15.8166	25.3949	37.0214	-0.258724
15.16	15.8517	25.3949	37.0214	-0.257776
15.18	15.8869	25.3949	37.0214	-0.256826
15.2	15.9221	25.3949	37.0214	-0.255874
15.22	15.9574	25.3949	37.0214	-0.254921
15.24	15.9927	25.3949	37.0214	-0.253967
15.26	16.0281	25.3949	37.0214	-0.253011
15.28	16.0635	25.3949	37.0214	-0.252055
15.3	16.099	25.3949	37.0214	-0.251097
15.32	16.1345	25.3949	37.0214	-0.250138
15.34	16.17	25.3949	37.0214	-0.249177
15.36	16.2056	25.3949	37.0214	-0.248216
15.38	16.2413	25.3949	37.0214	-0.247254
15.4	16.2769	25.3949	37.0214	-0.24629
15.42	16.3126	25.3949	37.0214	-0.245326
15.44	16.3483	25.3949	37.0214	-0.244361
15.46	16.3841	25.3949	37.0214	-0.243395
15.48	16.4199	25.3949	37.0214	-0.242428
15.5	16.4557	25.3949	37.0214	-0.24146
15.52	16.4916	25.3949	37.0214	-0.240492
15.54	16.5275	25.3949	37.0214	-0.239522
15.56	16.5634	25.3949	37.0214	-0.238553
15.58	16.5993	25.3949	37.0214	-0.237582
15.6	16.6352	25.3949	37.0214	-0.236611
15.62	16.6712	25.3949	37.0214	-0.23564
15.64	16.7072	25.3949	37.0214	-0.234668
15.66	16.7432	25.3949	37.0214	-0.233696
15.68	16.7792	25.3949	37.0214	-0.232723
15.7	16.8152	25.3949	37.0214	-0.23175
15.72	16.8513	25.3949	37.0214	-0.230776
15.74	16.8873	25.3949	37.0214	-0.229803
15.76	16.9234	25.3949	37.0214	-0.228829
15.78	16.9594	25.3949	37.0214	-0.227855
15.8	16.9955	25.3949	37.0214	-0.226881
15.82	17.0315	25.3949	37.0214	-0.225907
15.84	17.0676	25.3949	37.0214	-0.224932
15.86	17.1037	25.3949	37.0214	-0.223958
15.88	17.1397	25.3949	37.0214	-0.222984
15.9	17.1758	25.3949	37.0214	-0.22201
15.92	17.2119	25.3949	37.0214	-0.221036
15.94	17.2479	25.3949	37.0214	-0.220062
15.96	17.284	25.3949	37.0214	-0.219088
15.98	17.32	25.3949	37.0214	-0.218115
16	17.356	25.3949	37.0214	-0.217142
16.02	17.392	25.3949	37.0214	-0.216169
16.04	17.428	25.3949	37.0214	-0.215197
16.06	17.464	25.3949	37.0214	-0.214225
16.08	17.5	25.3949	37.0214	-0.213254
16.1	17.5359	25.3949	37.0214	-0.212283
16.12	17.5718	25.3949	37.0214	-0.211313
16.14	17.6077	25.3949	37.0214	-0.210343
16.16	17.6436	25.3949	37.0214	-0.209374
16.18	17.6795	25.3949	37.0214	-0.208406
16.2	17.7153	25.3949	37.0214	-0.207438
16.22	17.7511	25.3949	37.0214	-0.206471
16.24	17.7868	25.3949	37.0214	-0.205505
16.26	17.8226	25.3949	37.0214	-0.20454
16.28	17.8583	25.3949	37.0214	-0.203576
16.3	17.8939	25.3949	37.0214	-0.202613
16.32	17.9295	25.3949	37.0214	-0.201651
16.34	17.9651	25.3949	37.0214	-0.20069
16.36	18.0007	25.3949	37.0214	-0.19973
16.38	18.0362	25.3949	37.0214	-0.198771
16.4	18.0716	25.3949	37.0214	-0.197813
16.42	18.107	25.3949	37.0214	-0.196856
16.44	18.1424	25.3949	37.0214	-0.195901
16.46	18.1777	25.3949	37.0214	-0.194947
16.48	18.213	25.3949	37.0214	-0.193995
16.5	18.2482	25.3949	37.0214	-0.193043
16.52	18.2834	25.3949	37.0214	-0.192093
16.54	18.3185	25.3949	37.0214	-0.191145
16.56	18.3535	25.3949	37.0214	-0.190198
16.58	18.3885	25.3949	37.0214	-0.189253
16.6	18.4234	25.3949	37.0214	-0.188309
16.62	18.4583	25.3949	37.0214	-0.187367
16.64	18.4991	25.3949	37.0214	-0.186267
16.66	18.5338	25.3949	37.0214	-0.185328
16.68	18.5686	25.3949	37.0214	-0.18439
16.7	18.6062	25.3949	37.0214	-0.183374
16.72	18.6408	25.3949	37.0214	-0.182439
16.74	18.6753	25.3949	37.0214	-0.181506
16.76	18.7098	25.3949	37.0214	-0.180575
16.78	18.7442	25.3949	37.0214	-0.179646
16.8	18.7785	25.3949	37.0214	-0.178719
16.82	18.8128	25.3949	37.0214	-0.177794
16.84	18.8469	25.3949	37.0214	-0.176871
16.86	18.881	25.3949	37.0214	-0.17595
16.88	18.915	25.3949	37.0214	-0.175031
16.9	18.9489	25.3949	37.0214	-0.174115
16.92	18.9828	25.3949	37.0214	-0.173201
16.94	19.0165	25.3949	37.0214	-0.172289
16.96	19.0502	25.3949	37.0214	-0.17138
16.98	19.0838	25.3949	37.0214	-0.170473
17	19.1173	25.3949	37.0214	-0.169568
17.02	19.1507	25.3949	37.0214	-0.168666
17.04	19.184	25.3949	37.0214	-0.167767
17.06	19.2172	25.3949	37.0214	-0.16687
17.08	19.2503	25.3949	37.0214	-0.165976
17.1	19.2833	25.3949	37.0214	-0.165084
17.12	19.3162	25.3949	37.0214	-0.164195
17.14	19.349	25.3949	37.0214	-0.163309
17.16	19.3817	25.3949	37.0214	-0.162425
17.18	19.4143	25.3949	37.0214	-0.161545
17.2	19.4468	25.3949	37.0214	-0.160667
17.22	19.4792	25.3949	37.0214	-0.159792
17.24	19.5115	25.3949	37.0214	-0.158921
17.26	19.5436	25.3949	37.0214	-0.158052
17.28	19.5757	25.3949	37.0214	-0.157186
17.3	19.6076	25.3949	37.0214	-0.156323
17.32	19.6394	25.3949	37.0214	-0.155464
17.34	19.6711	25.3949	37.0214	-0.154608
17.36	19.7027	25.3949	37.0214	-0.153755
17.38	19.7342	25.3949	37.0214	-0.152905
17.4	19.7655	25.3949	37.0214	-0.152058
17.42	19.7967	25.3949	37.0214	-0.151215
17.44	19.8278	25.3949	37.0214	-0.150375
17.46	19.8588	25.3949	37.0214	-0.149538
17.48	19.8896	25.3949	37.0214	-0.148706
17.5	19.9203	25.3949	37.0214	-0.147876
17.52	19.9509	25.3949	37.0214	-0.14705
17.54	19.9814	25.3949	37.0214	-0.146228
17.56	20.0117	25.3949	37.0214	-0.145409
17.58	20.0418	25.3949	37.0214	-0.144594
17.6	20.0719	25.3949	37.0214	-0.143783
17.62	20.1018	25.3949	37.0214	-0.142976
17.64	20.1315	25.3949	37.0214	-0.142172
17.66	20.1611	25.3949	37.0214	-0.141372
17.68	20.1906	25.3949	37.0214	-0.140576
17.7	20.2199	25.3949	37.0214	-0.139785
17.72	20.2491	25.3949	37.0214	-0.138996
17.74	20.2781	25.3949	37.0214	-0.138212
17.76	20.307	25.3949	37.0214	-0.137433
17.78	20.3357	25.3949	37.0214	-0.136657
17.8	20.3643	25.3949	37.0214	-0.135885
17.82	20.3927	25.3949	37.0214	-0.135118
17.84	20.421	25.3949	37.0214	-0.134354
17.86	20.4491	25.3949	37.0214	-0.133595
17.88	20.477	25.3949	37.0214	-0.132839
17.9	20.5048	25.3949	37.0214	-0.132088
17.92	20.5325	25.3949	37.0214	-0.131341
17.94	20.56	25.3949	37.0214	-0.130598
17.96	20.5874	25.3949	37.0214	-0.129859
17.98	20.6146	25.3949	37.0214	-0.129124
18	20.6416	25.3949	37.0214	-0.128393
18.02	20.6686	25.3949	37.0214	-0.127666
18.04	20.6953	25.3949	37.0214	-0.126943
18.06	20.7219	25.3949	37.0214	-0.126224
18.08	20.7484	25.3949	37.0214	-0.12551
18.1	20.7747	25.3949	37.0214	-0.124799
18.12	20.8009	25.3949	37.0214	-0.124092
18.14	20.8269	25.3949	37.0214	-0.123389
18.16	20.8527	25.3949	37.0214	-0.122691
18.18	20.8785	25.3949	37.0214	-0.121996
18.2	20.904	25.3949	37.0214	-0.121306
18.22	20.9294	25.3949	37.0214	-0.120619
18.24	20.9547	25.3949	37.0214	-0.119936
18.26	20.9798	25.3949	37.0214	-0.119258
18.28	21.0048	25.3949	37.0214	-0.118583
18.3	21.0297	25.3949	37.0214	-0.117912
18.32	21.0543	25.3949	37.0214	-0.117245
18.34	21.0789	25.3949	37.0214	-0.116583
18.36	21.1033	25.3949	37.0214	-0.115924
18.38	21.1275	25.3949	37.0214	-0.115269
18.4	21.1516	25.3949	37.0214	-0.114618
18.42	21.1756	25.3949	37.0214	-0.113971
18.44	21.1994	25.3949	37.0214	-0.113328
18.46	21.223	25.3949	37.0214	-0.112689
18.48	21.2465	25.3949	37.0214	-0.112054
18.5	21.2699	25.3949	37.0214	-0.111422
18.52	21.2932	25.3949	37.0214	-0.110795
18.54	21.3162	25.3949	37.0214	-0.110171
18.56	21.3392	25.3949	37.0214	-0.109552
18.58	21.362	25.3949	37.0214	-0.108936
18.6	21.3846	25.3949	37.0214	-0.108324
18.62	21.4071	25.3949	37.0214	-0.107716
18.64	21.4295	25.3949	37.0214	-0.107112
18.66	21.4517	25.3949	37.0214	-0.106512
18.68	21.4738	25.3949	37.0214	-0.105916
18.7	21.4957	25.3949	37.0214	-0.105323
18.72	21.5175	25.3949	37.0214	-0.104735
18.74	21.5392	25.3949	37.0214	-0.10415
18.76	21.5607	25.3949	37.0214	-0.103569
18.78	21.582	25.3949	37.0214	-0.102992
18.8	21.6033	25.3949	37.0214	-0.102418
18.82	21.6243	25.3949	37.0214	-0.101849
18.84	21.6453	25.3949	37.0214	-0.101283
18.86	21.6661	25.3949	37.0214	-0.100721
18.88	21.6868	25.3949	37.0214	-0.100163
18.9	21.7073	25.3949	37.0214	-0.0996084
18.92	21.7277	25.3949	37.0214	-0.0990576
18.94	21.7479	25.3949	37.0214	-0.0985106
18.96	21.768	25.3949	37.0214	-0.0979674
18.98	21.788	25.3949	37.0214	-0.097428
19	21.8078	25.3949	37.0214	-0.0968921
19.02	21.8275	25.3949	37.0214	-0.0963602
19.04	21.8471	25.3949	37.0214	-0.0958319
19.06	21.8665	25.3949	37.0214	-0.0953071
19.08	21.8858	25.3949	37.0214	-0.0947863
19.1	21.905	25.3949	37.0214	-0.094269
19.12	21.924	25.3949	37.0214	-0.0937553
19.14	21.9429	25.3949	37.0214	-0.0932453
19.16	21.9616	25.3949	37.0214	-0.0927391
19.18	21.9802	25.3949	37.0214	-0.0922361
19.2	21.9987	25.3949	37.0214	-0.0917372
19.22	22.017	25.3949	37.0214	-0.0912416
19.24	22.0353	25.3949	37.0214	-0.0907497
19.26	22.0533	25.3949	37.0214	-0.0902613
19.28	22.0713	25.3949	37.0214	-0.0897768
19.3	22.0891	25.3949	37.0214	-0.0892954
19.32	22.1068	25.3949	37.0214	-0.0888179
19.34	22.1243	25.3949	37.0214	-0.0883435
19.36	22.1417	25.3949	37.0214	-0.087873
19.38	22.159	25.3949	37.0214	-0.087406
19.4	22.1762	25.3949	37.0214	-0.0869422
19.42	22.1932	25.3949	37.0214	-0.0864819
19.44	22.2102	25.3949	37.0214	-0.0860251
19.46	22.2269	25.3949	37.0214	-0.0855719
19.48	22.2436	25.3949	37.0214	-0.0851222
19.5	22.2601	25.3949	37.0214	-0.0846757
19.52	22.2765	25.3949	37.0214	-0.0842324
19.54	22.2928	25.3949	37.0214	-0.0837927
19.56	22.309	25.3949	37.0214	-0.0833562
19.58	22.325	25.3949	37.0214	-0.0829232
19.6	22.3409	25.3949	37.0214	-0.0824934
19.62	22.3567	25.3949	37.0214	-0.0820669
19.64	22.3724	25.3949	37.0214	-0.0816436
19.66	22.3879	25.3949	37.0214	-0.0812236
19.68	22.4033	25.3949	37.0214	-0.0808068
19.7	22.4187	25.3949	37.0214	-0.0803933
19.72	22.4339	25.3949	37.0214	-0.0799827
19.74	22.4489	25.3949	37.0214	-0.0795756
19.76	22.4639	25.3949	37.0214	-0.0791713
19.78	22.4788	25.3949	37.0214	-0.0787702
19.8	22.4935	25.3949	37.0214	-0.0783723
19.82	22.5081	25.3949	37.0214	-0.0779774
19.84	22.5226	25.3949	37.0214	-0.0775852
19.86	22.537	25.3949	37.0214	-0.0771962
19.88	22.5513	25.3949	37.0214	-0.0768102
19.9	22.5655	25.3949	37.0214	-0.0764269
19.92	22.5796	25.3949	37.0214	-0.0760466
19.94	22.5936	25.3949	37.0214	-0.0756693
19.96	22.6074	25.3949	37.0214	-0.0752946
19.98	22.6212	25.3949	37.0214	-0.0749227
20	22.6349	25.3949	37.0214	-0.0745534
20.02	22.6484	25.3949	37.0214	-0.0741869
20.04	22.6619	25.3949	37.0214	-0.0738228
20.06	22.6753	25.3949	37.0214	-0.0734616
20.08	22.6886	25.3949	37.0214	-0.0731026
20.1	22.7018	25.3949	37.0214	-0.0727464
20.12	22.7149	25.3949	37.0214	-0.0723925
20.14	22.7279	25.3949	37.0214	-0.0720408
20.16	22.7408	25.3949	37.0214	-0.0716916
20.18	22.7537	25.3949	37.0214	-0.0713445
20.2	22.7664	25.3949	37.0214	-0.0709998
20.22	22.7791	25.3949	37.0214	-0.070657
20.24	22.7917	25.3949	37.0214	-0.0703164
20.26	22.8043	25.3949	37.0214	-0.0699777
20.28	22.8167	25.3949	37.0214	-0.0696409
20.3	22.8291	25.3949	37.0214	-0.0693059
20.32	22.8415	25.3949	37.0214	-0.0689726
20.34	22.8538	25.3949	37.0214	-0.0686409
20.36	22.866	25.3949	37.0214	-0.0683108
20.38	22.8781	25.3949	37.0214	-0.0679821
20.4	22.8903	25.3949	37.0214	-0.067655
20.42	22.9023	25.3949	37.0214	-0.0673287
20.44	22.9144	25.3949	37.0214	-0.0670037
20.46	22.9264	25.3949	37.0214	-0.0666796
20.48	22.9383	25.3949	37.0214	-0.0663565
20.5	22.9503	25.3949	37.0214	-0.066034
20.52	22.9622	25.3949	37.0214	-0.065712
20.54	22.9741	25.3949	37.0214	-0.0653906
20.56	22.986	25.3949	37.0214	-0.0650692
20.58	22.9979	25.3949	37.0214	-0.064748
20.6	23.0098	25.3949	37.0214	-0.0644266
20.62	23.0217	25.3949	37.0214	-0.0641046
20.64	23.0336	25.3949	37.0214	-0.0637824
20.66	23.0456	25.3949	37.0214	-0.0634593
20.68	23.0576	25.3949	37.0214	-0.0631352
20.7	23.0696	25.3949	37.0214	-0.0628097
20.72	23.0817	25.3949	37.0214	-0.0624826
20.74	23.0939	25.3949	37.0214	-0.0621536
20.76	23.1062	25.3949	37.0214	-0.0618224
20.78	23.1185	25.3949	37.0214	-0.0614888
20.8	23.131	25.3949	37.0214	-0.0611523
20.82	23.1436	25.3949	37.0214	-0.0608122
20.84	23.1563	25.3949	37.0214	-0.0604686
20.86	23.1692	25.3949	37.0214	-0.0601207
20.88	23.1822	25.3949	37.0214	-0.0597679
20.9	23.1955	25.3949	37.0214	-0.05941
20.92	23.209	25.3949	37.0214	-0.0590462
20.94	23.2227	25.3949	37.0214	-0.0586759
20.96	23.2367	25.3949	37.0214	-0.0582982
20.98	23.2509	25.3949	37.0214	-0.0579125
21	23.2655	25.3949	37.0214	-0.0575181
21.02	23.2805	25.3949	37.0214	-0.0571141
21.04	23.2958	25.3949	37.0214	-0.0566994
21.06	23.3116	25.3949	37.0214	-0.0562729
21.08	23.3279	25.3949	37.0214	-0.0558332
21.1	23.3447	25.3949	37.0214	-0.0553794
21.12	23.3621	25.3949	37.0214	-0.0549097
21.14	23.3801	25.3949	37.0214	-0.0544229
21.16	23.3989	25.3949	37.0214	-0.0539167
21.18	23.4184	25.3949	37.0214	-0.0533897
21.2	23.4387	25.3949	37.0214	-0.0528392
21.22	23.4601	25.3949	37.0214	-0.0522634
21.24	23.4825	25.3949	37.0214	-0.0516588
21.26	23.506	25.3949	37.0214	-0.0510233
21.28	23.5308	25.3949	37.0214	-0.0503526
21.3	23.5571	25.3949	37.0214	-0.0496435
21.32	23.5849	25.3949	37.0214	-0.0488913
21.34	23.6145	25.3949	37.0214	-0.0480914
21.36	23.6461	25.3949	37.0214	-0.0472379
21.38	23.6799	25.3949	37.0214	-0.0463249
21.4	23.7162	25.3949	37.0214	-0.0453447
21.42	23.7994	25.3949	37.0214	-0.0430968
21.44	23.842	25.3949	37.0214	-0.0419461
21.46	23.8882	25.3949	37.0214	-0.0406995
21.48	23.9603	25.3949	37.0214	-0.0387525
21.5	24.0152	25.3949	37.0214	-0.0372677
21.52	24.0755	25.3949	37.0214	-0.0356408
21.54	24.1417	25.3949	37.0214	-0.0338519
21.56	24.2149	25.3949	37.0214	-0.0318754
21.58	24.2961	25.3949	37.0214	-0.0296824
21.6	24.3866	25.3949	37.0214	-0.0272373
21.62	24.4881	25.3949	37.0214	-0.0244962
21.64	24.6025	25.3949	37.0214	-0.021405
21.66	24.7325	25.3949	37.0214	-0.0178924
21.68	24.8817	25.3949	37.0214	-0.0138634
21.7	25.0549	25.3949	37.0214	-0.00918371
21.72	25.2596	25.3949	37.0214	-0.0036561
21.74	25.5066	25.3949	37.0214	0.00301733
21.76	25.8128	25.3949	37.0214	0.0112882
21.78	26.2034	25.3949	37.0214	0.0218367
21.8	26.7148	25.3949	37.0214	0.0356528
21.82	27.3985	25.3949	37.0214	0.054118
21.84	28.3215	25.3949	37.0214	0.0790506
21.86	29.5665	25.3949	37.0214	0.112679
21.88	31.2259	25.3949	37.0214	0.157502
21.9	33.3916	25.3949	37.0214	0.216
21.92	36.1385	25.3949	37.0214	0.290199
21.94	39.5028	25.3949	37.0214	0.381074
21.96	43.4539	25.3949	37.0214	0.487797
21.98	47.8571	25.3949	37.0214	0.606735
22	52.4278	25.3949	37.0214	0.730195
22.02	56.6937	25.3949	37.0214	0.845422
22.04	60.0331	25.3949	37.0214	0.935624
22.06	60.6662	25.3949	37.0214	0.952727
22.08	51.7801	25.3949	37.0214	0.712699
22.1	46.4992	25.3949	37.0214	0.570055
22.12	41.8658	25.3949	37.0214	0.444902
22.14	34.8407	25.3949	37.0214	0.255145
22.16	31.0334	25.3949	37.0214	0.152303
22.18	28.8199	25.3949	37.0214	0.0925144
22.2	27.3438	25.3949	37.0214	0.0526405
22.22	26.3878	25.3949	37.0214	0.0268192
22.24	25.7706	25.3949	37.0214	0.0101459
22.26	25.3609	25.3949	37.0214	-0.000918227
22.28	25.083	25.3949	37.0214	-0.00842658
22.3	24.8933	25.3949	37.0214	-0.0135509
22.32	24.7661	25.3949	37.0214	-0.0169865
22.34	24.6854	25.3949	37.0214	-0.0191641
22.36	24.6413	25.3949	37.0214	-0.0203575
22.38	24.627	25.3949	37.0214	-0.0207443
22.4	24.6382	25.3949	37.0214	-0.0204394
22.42	24.6724	25.3949	37.0214	-0.0195169
22.44	24.7277	25.3949	37.0214	-0.0180224
22.46	24.8033	25.3949	37.0214	-0.0159809
22.48	24.8987	25.3949	37.0214	-0.0134032
22.5	25.014	25.3949	37.0214	-0.0102887
22.52	25.1495	25.3949	37.0214	-0.00662897
22.54	25.3057	25.3949	37.0214	-0.00240926
22.56	25.4834	25.3949	37.0214	0.00238986
22.58	25.6834	25.3949	37.0214	0.00779159
22.6	25.9066	25.3949	37.0214	0.0138216
22.62	26.1541	25.3949	37.0214	0.0205069
22.64	26.4269	25.3949	37.0214	0.0278754
22.66	26.7261	25.3949	37.0214	0.0359556
22.68	27.0526	25.3949	37.0214	0.0447745
22.7	27.4074	25.3949	37.0214	0.0543587
22.72	27.8488	25.3949	37.0214	0.0662818
22.74	28.263	25.3949	37.0214	0.0774718
22.76	28.708	25.3949	37.0214	0.0894916
22.78	29.1842	25.3949	37.0214	0.102355
22.8	29.7205	25.3949	37.0214	0.11684
22.82	30.2601	25.3949	37.0214	0.131415
22.84	30.8314	25.3949	37.0214	0.146846
22.86	31.4395	25.3949	37.0214	0.163273
22.88	32.073	25.3949	37.0214	0.180384
22.9	32.7364	25.3949	37.0214	0.198303
22.92	33.4313	25.3949	37.0214	0.217073
22.94	34.1508	25.3949	37.0214	0.236508
22.96	34.8958	25.3949	37.0214	0.256631
22.98	35.6642	25.3949	37.0214	0.277387
23	36.4535	25.3949	37.0214	0.298708
23.02	37.261	25.3949	37.0214	0.320519
23.04	38.0836	25.3949	37.0214	0.342737
23.06	38.9177	25.3949	37.0214	0.365268
23.08	39.7597	25.3949	37.0214	0.388011
23.1	40.6054	25.3949	37.0214	0.410857
23.12	41.4507	25.3949	37.0214	0.433689
23.14	42.2909	25.3949	37.0214	0.456383
23.16	43.1212	25.3949	37.0214	0.47881
23.18	43.9365	25.3949	37.0214	0.500834
23.2	44.7318	25.3949	37.0214	0.522316
23.22	45.5018	25.3949	37.0214	0.543114
23.24	46.241	25.3949	37.0214	0.563082
23.26	46.9442	25.3949	37.0214	0.582076
23.28	47.606	25.3949	37.0214	0.599952
23.3	48.2211	25.3949	37.0214	0.616567
23.32	48.7846	25.3949	37.0214	0.631786
23.34	49.2914	25.3949	37.0214	0.645478
23.36	49.7373	25.3949	37.0214	0.657521
23.38	50.118	25.3949	37.0214	0.667805
23.4	50.43	25.3949	37.0214	0.676233
23.42	50.6703	25.3949	37.0214	0.682721
23.44	50.8363	25.3949	37.0214	0.687207
23.46	50.9211	25.3949	37.0214	0.689496
23.48	50.7403	25.3949	37.0214	0.684612
23.5	50.2155	25.3949	37.0214	0.670439
23.52	49.372	25.3949	37.0214	0.647654
23.54	48.1582	25.3949	37.0214	0.614867
23.56	46.5946	25.3949	37.0214	0.572632
23.58	44.755	25.3949	37.0214	0.522941
23.6	42.7209	25.3949	37.0214	0.467999
23.62	40.576	25.3949	37.0214	0.410061
23.64	38.4	25.3949	37.0214	0.351285
23.66	36.2497	25.3949	37.0214	0.293202
23.68	34.216	25.3949	37.0214	0.238269
23.7	32.3302	25.3949	37.0214	0.187331
23.72	30.6173	25.3949	37.0214	0.141065
23.74	29.1113	25.3949	37.0214	0.100385
23.76	27.8107	25.3949	37.0214	0.0652534
23.78	26.7238	25.3949	37.0214	0.0358934
23.8	25.8136	25.3949	37.0214	0.0113093
23.82	25.0749	25.3949	37.0214	-0.00864564
23.84	24.4866	25.3949	37.0214	-0.0245367
23.86	24.0327	25.3949	37.0214	-0.0367961
23.88	23.6792	25.3949	37.0214	-0.0463452
23.9	23.4118	25.3949	37.0214	-0.0535672
23.92	23.2125	25.3949	37.0214	-0.0589506
23.94	23.0658	25.3949	37.0214	-0.0629139
23.96	22.9587	25.3949	37.0214	-0.0658047
23.98	22.8811	25.3949	37.0214	-0.0679016
24	22.8248	25.3949	37.0214	-0.0694226
24.02	22.7837	25.3949	37.0214	-0.0705336
24.04	22.7532	25.3949	37.0214	-0.0713572
24.06	22.73	25.3949	37.0214	-0.0719827
24.08	22.7119	25.3949	37.0214	-0.0724733
24.1	22.6971	25.3949	37.0214	-0.0728725
24.12	22.6846	25.3949	37.0214	-0.0732099
24.14	22.6737	25.3949	37.0214	-0.0735051
24.16	22.6638	25.3949	37.0214	-0.0737709
24.18	22.6548	25.3949	37.0214	-0.0740156
24.2	22.6463	25.3949	37.0214	-0.0742439
24.22	22.6383	25.3949	37.0214	-0.0744591
24.24	22.6308	25.3949	37.0214	-0.0746628
24.26	22.6237	25.3949	37.0214	-0.0748562
24.28	22.6168	25.3949	37.0214	-0.0750402
24.3	22.6104	25.3949	37.0214	-0.0752141
24.32	22.6043	25.3949	37.0214	-0.0753786
24.34	22.5986	25.3949	37.0214	-0.0755334
24.36	22.5932	25.3949	37.0214	-0.0756782
24.38	22.5882	25.3949	37.0214	-0.0758124
24.4	22.5837	25.3949	37.0214	-0.0759364
24.42	22.5795	25.3949	37.0214	-0.076049
24.44	22.5757	25.3949	37.0214	-0.0761501
24.46	22.5725	25.3949	37.0214	-0.0762389
24.48	22.5696	25.3949	37.0214	-0.0763151
24.5	22.5673	25.3949	37.0214	-0.076378
24.52	22.5655	25.3949	37.0214	-0.0764267
24.54	22.5643	25.3949	37.0214	-0.0764604
24.56	22.5636	25.3949	37.0214	-0.0764782
24.58	22.5635	25.3949	37.0214	-0.0764796
24.6	22.5642	25.3949	37.0214	-0.0764634
24.62	22.5654	25.3949	37.0214	-0.0764283
24.64	22.5675	25.3949	37.0214	-0.0763732
24.66	22.5703	25.3949	37.0214	-0.076297
24.68	22.574	25.3949	37.0214	-0.0761981
24.7	22.5785	25.3949	37.0214	-0.076075
24.72	22.584	25.3949	37.0214	-0.0759264
24.74	22.5906	25.3949	37.0214	-0.0757503
24.76	22.5982	25.3949	37.0214	-0.075545
24.78	22.6069	25.3949	37.0214	-0.0753081
24.8	22.6169	25.3949	37.0214	-0.0750375
24.82	22.6283	25.3949	37.0214	-0.0747303
24.84	22.6411	25.3949	37.0214	-0.0743846
24.86	22.6555	25.3949	37.0214	-0.073997
24.88	22.6715	25.3949	37.0214	-0.0735643
24.9	22.6893	25.3949	37.0214	-0.0730826
24.92	22.7091	25.3949	37.0214	-0.0725484
24.94	22.731	25.3949	37.0214	-0.0719571
24.96	22.7552	25.3949	37.0214	-0.0713039
24.98	22.7818	25.3949	37.0214	-0.0705833
25	22.8112	25.3949	37.0214	-0.0697894
25.02	22.8436	25.3949	37.0214	-0.0689153
25.04	22.8792	25.3949	37.0214	-0.0679537
25.06	22.9184	25.3949	37.0214	-0.066896
25.08	22.9614	25.3949	37.0214	-0.0657323
25.1	23.0088	25.3949	37.0214	-0.0644517
25.12	23.061	25.3949	37.0214	-0.0630417
25.14	23.1186	25.3949	37.0214	-0.0614875
25.16	23.1821	25.3949	37.0214	-0.0597722
25.18	23.2523	25.3949	37.0214	-0.0578763
25.2	23.33	25.3949	37.0214	-0.0557762
25.22	23.4163	25.3949	37.0214	-0.0534448
25.24	23.5125	25.3949	37.0214	-0.0508485
25.26	23.6198	25.3949	37.0214	-0.0479477
25.28	23.7403	25.3949	37.0214	-0.0446926
25.3	23.8762	25.3949	37.0214	-0.0410218
25.32	24.0304	25.3949	37.0214	-0.0368582
25.34	24.2065	25.3949	37.0214	-0.0321021
25.36	24.4093	25.3949	37.0214	-0.0266228
25.38	24.6454	25.3949	37.0214	-0.0202465
25.4	24.9234	25.3949	37.0214	-0.0127354
25.42	25.2557	25.3949	37.0214	-0.00376145
25.44	25.6587	25.3949	37.0214	0.00712414
25.46	26.1539	25.3949	37.0214	0.0204996
25.48	26.7654	25.3949	37.0214	0.0370176
25.5	27.516	25.3949	37.0214	0.0572937
25.52	28.432	25.3949	37.0214	0.0820343
25.54	29.5825	25.3949	37.0214	0.113111
25.56	31.1641	25.3949	37.0214	0.155832
25.58	33.4973	25.3949	37.0214	0.218856
25.6	36.4901	25.3949	37.0214	0.299695
25.62	38.6326	25.3949	37.0214	0.357568
25.64	38.2193	25.3949	37.0214	0.346405
25.66	36.9912	25.3949	37.0214	0.31323
25.68	36.2792	25.3949	37.0214	0.293999
25.7	35.1909	25.3949	37.0214	0.264603
25.72	33.8361	25.3949	37.0214	0.228007
25.74	33.1443	25.3949	37.0214	0.209322
25.76	33.197	25.3949	37.0214	0.210746
25.78	33.8194	25.3949	37.0214	0.227558
25.8	34.8712	25.3949	37.0214	0.255966
25.82	36.2861	25.3949	37.0214	0.294185
25.84	38.0529	25.3949	37.0214	0.34191
25.86	40.1868	25.3949	37.0214	0.39955
25.88	42.7114	25.3949	37.0214	0.467742
25.9	45.653	25.3949	37.0214	0.547199
25.92	49.0504	25.3949	37.0214	0.638966
25.94	52.9846	25.3949	37.0214	0.745235
25.96	57.6341	25.3949	37.0214	0.870824
25.98	63.3422	25.3949	37.0214	1.02501
26	70.6526	25.3949	37.0214	1.22247
26.02	80.2072	25.3949	37.0214	1.48056
26.04	92.3324	25.3949	37.0214	1.80807
26.06	106.207	25.3949	37.0214	2.18284
26.08	119.097	25.3949	37.0214	2.53102
26.1	127.155	25.3949	37.0214	2.74867
26.12	126.821	25.3949	37.0214	2.73965
26.14	119.31	25.3949	37.0214	2.53678
26.16	108.195	25.3949	37.0214	2.23655
26.18	94.7737	25.3949	37.0214	1.87402
26.2	79.9379	25.3949	37.0214	1.47328
26.22	66.2505	25.3949	37.0214	1.10357
26.24	55.1646	25.3949	37.0214	0.804121
26.26	46.8079	25.3949	37.0214	0.578394
26.28	40.7248	25.3949	37.0214	0.414082
26.3	36.3533	25.3949	37.0214	0.295999
26.32	33.2003	25.3949	37.0214	0.210833
26.34	30.9541	25.3949	37.0214	0.15016
26.36	29.2136	25.3949	37.0214	0.103147
26.38	27.8651	25.3949	37.0214	0.0667221
26.4	26.7922	25.3949	37.0214	0.0377424
26.42	25.9531	25.3949	37.0214	0.0150768
26.44	25.2318	25.3949	37.0214	-0.00440756
26.46	24.6268	25.3949	37.0214	-0.0207481
26.48	24.1136	25.3949	37.0214	-0.0346101
26.5	23.6739	25.3949	37.0214	-0.0464867
26.52	23.2938	25.3949	37.0214	-0.056754
26.54	22.9625	25.3949	37.0214	-0.0657023
26.56	22.6716	25.3949	37.0214	-0.0735599
26.58	22.4144	25.3949	37.0214	-0.0805078
26.6	22.1855	25.3949	37.0214	-0.0866907
26.62	21.9806	25.3949	37.0214	-0.0922262
26.64	21.7961	25.3949	37.0214	-0.0972092
26.66	21.6292	25.3949	37.0214	-0.101718
26.68	21.4774	25.3949	37.0214	-0.105819
26.7	21.3387	25.3949	37.0214	-0.109565
26.72	21.2114	25.3949	37.0214	-0.113002
26.74	21.0942	25.3949	37.0214	-0.116168
26.76	20.9859	25.3949	37.0214	-0.119094
26.78	20.8854	25.3949	37.0214	-0.12181
26.8	20.7918	25.3949	37.0214	-0.124338
26.82	20.7044	25.3949	37.0214	-0.126698
26.84	20.6226	25.3949	37.0214	-0.128908
26.86	20.5457	25.3949	37.0214	-0.130983
26.88	20.4734	25.3949	37.0214	-0.132937
26.9	20.4052	25.3949	37.0214	-0.13478
26.92	20.3407	25.3949	37.0214	-0.136522
26.94	20.2796	25.3949	37.0214	-0.138172
26.96	20.2216	25.3949	37.0214	-0.139738
26.98	20.1665	25.3949	37.0214	-0.141226
27	20.1141	25.3949	37.0214	-0.142643
27.02	20.0641	25.3949	37.0214	-0.143993
27.04	20.0164	25.3949	37.0214	-0.145281
27.06	19.9709	25.3949	37.0214	-0.14651
27.08	19.9274	25.3949	37.0214	-0.147685
27.1	19.8859	25.3949	37.0214	-0.148808
27.12	19.8461	25.3949	37.0214	-0.149881
27.14	19.8081	25.3949	37.0214	-0.150908
27.16	19.7718	25.3949	37.0214	-0.15189
27.18	19.737	25.3949	37.0214	-0.152828
27.2	19.7039	25.3949	37.0214	-0.153724
27.22	19.6722	25.3949	37.0214	-0.154578
27.24	19.6421	25.3949	37.0214	-0.155392
27.26	19.6134	25.3949	37.0214	-0.156167
27.28	19.5862	25.3949	37.0214	-0.156901
27.3	19.5605	25.3949	37.0214	-0.157596
27.32	19.5362	25.3949	37.0214	-0.158252
27.34	19.5134	25.3949	37.0214	-0.158867
27.36	19.4922	25.3949	37.0214	-0.159442
27.38	19.4725	25.3949	37.0214	-0.159974
27.4	19.4543	25.3949	37.0214	-0.160464
27.42	19.4378	25.3949	37.0214	-0.160909
27.44	19.4231	25.3949	37.0214	-0.161309
27.46	19.4101	25.3949	37.0214	-0.16166
27.48	19.3989	25.3949	37.0214	-0.16196
27.5	19.3898	25.3949	37.0214	-0.162208
27.52	19.3827	25.3949	37.0214	-0.162398
27.54	19.3779	25.3949	37.0214	-0.162529
27.56	19.3754	25.3949	37.0214	-0.162595
27.58	19.3756	25.3949	37.0214	-0.162592
27.6	19.3785	25.3949	37.0214	-0.162514
27.62	19.3844	25.3949	37.0214	-0.162354
27.64	19.3935	25.3949	37.0214	-0.162107
27.66	19.4062	25.3949	37.0214	-0.161763
27.68	19.4229	25.3949	37.0214	-0.161314
27.7	19.4438	25.3949	37.0214	-0.160748
27.72	19.4696	25.3949	37.0214	-0.160053
27.74	19.5006	25.3949	37.0214	-0.159214
27.76	19.5376	25.3949	37.0214	-0.158215
27.78	19.5812	25.3949	37.0214	-0.157038
27.8	19.6323	25.3949	37.0214	-0.155658
27.82	19.6886	25.3949	37.0214	-0.154137
27.84	19.7578	25.3949	37.0214	-0.152267
27.86	19.838	25.3949	37.0214	-0.150099
27.88	19.9293	25.3949	37.0214	-0.147634
27.9	20.0368	25.3949	37.0214	-0.14473
27.92	20.1614	25.3949	37.0214	-0.141366
27.94	20.3058	25.3949	37.0214	-0.137465
27.96	20.4737	25.3949	37.0214	-0.13293
27.98	20.6693	25.3949	37.0214	-0.127645
28	20.8981	25.3949	37.0214	-0.121465
28.02	21.3408	25.3949	37.0214	-0.109508
28.04	21.6588	25.3949	37.0214	-0.100919
28.06	22.0338	25.3949	37.0214	-0.0907902
28.08	22.4759	25.3949	37.0214	-0.0788482
28.1	23.0816	25.3949	37.0214	-0.0624869
28.12	23.6868	25.3949	37.0214	-0.0461396
28.14	24.3808	25.3949	37.0214	-0.0273937
28.16	25.162	25.3949	37.0214	-0.00629268
28.18	26.026	25.3949	37.0214	0.0170468
28.2	26.9761	25.3949	37.0214	0.0427089
28.22	28.0426	25.3949	37.0214	0.0715163
28.24	29.3104	25.3949	37.0214	0.105763
28.26	30.9385	25.3949	37.0214	0.149738
28.28	33.1358	25.3949	37.0214	0.209093
28.3	36.0367	25.3949	37.0214	0.287449
28.32	39.4375	25.3949	37.0214	0.37931
28.34	42.5615	25.3949	37.0214	0.463692
28.36	44.3515	25.3949	37.0214	0.512043
28.38	44.689	25.3949	37.0214	0.52116
28.4	43.6777	25.3949	37.0214	0.493842
28.42	41.9175	25.3949	37.0214	0.446298
28.44	39.5658	25.3949	37.0214	0.382776
28.46	36.9677	25.3949	37.0214	0.312597
28.48	34.4445	25.3949	37.0214	0.244441
28.5	32.182	25.3949	37.0214	0.183327
28.52	30.3611	25.3949	37.0214	0.134143
28.54	28.964	25.3949	37.0214	0.0964049
28.56	27.8317	25.3949	37.0214	0.0658201
28.58	26.9143	25.3949	37.0214	0.0410399
28.6	26.1582	25.3949	37.0214	0.0206179
28.62	25.5363	25.3949	37.0214	0.00381849
28.64	25.0286	25.3949	37.0214	-0.00989438
28.66	24.6293	25.3949	37.0214	-0.0206798
28.68	24.3326	25.3949	37.0214	-0.0286965
28.7	24.1332	25.3949	37.0214	-0.0340825
28.72	24.0278	25.3949	37.0214	-0.0369271
28.74	24.0111	25.3949	37.0214	-0.0373785
28.76	24.0831	25.3949	37.0214	-0.0354353
28.78	24.2453	25.3949	37.0214	-0.0310532
28.8	24.5028	25.3949	37.0214	-0.024098
28.82	24.8645	25.3949	37.0214	-0.0143278
28.84	25.3443	25.3949	37.0214	-0.00136824
28.86	25.9621	25.3949	37.0214	0.015321
28.88	26.7462	25.3949	37.0214	0.036499
28.9	27.7355	25.3949	37.0214	0.0632222
28.92	28.9846	25.3949	37.0214	0.0969632
28.94	30.57	25.3949	37.0214	0.139786
28.96	32.5984	25.3949	37.0214	0.194574
28.98	35.213	25.3949	37.0214	0.265199
29	38.5809	25.3949	37.0214	0.356171
29.02	42.8233	25.3949	37.0214	0.470765
29.04	47.8571	25.3949	37.0214	0.606734
29.06	53.2414	25.3949	37.0214	0.75217
29.08	58.4244	25.3949	37.0214	0.89217
29.1	63.9313	25.3949	37.0214	1.04092
29.12	73.0303	25.3949	37.0214	1.2867
29.14	90.1675	25.3949	37.0214	1.7496
29.16	110.283	25.3949	37.0214	2.29294
29.18	115.689	25.3949	37.0214	2.43898
29.2	113.902	25.3949	37.0214	2.3907
29.22	112.059	25.3949	37.0214	2.34091
29.24	108.105	25.3949	37.0214	2.23412
29.26	96.7528	25.3949	37.0214	1.92748
29.28	83.6742	25.3949	37.0214	1.5742
29.3	70.8665	25.3949	37.0214	1.22825
29.32	59.5893	25.3949	37.0214	0.923637
29.34	50.3511	25.3949	37.0214	0.674099
29.36	43.1268	25.3949	37.0214	0.478963
29.38	37.6436	25.3949	37.0214	0.330854
29.4	33.5547	25.3949	37.0214	0.220407
29.42	30.525	25.3949	37.0214	0.138571
29.44	28.2691	25.3949	37.0214	0.0776344
29.46	26.5632	25.3949	37.0214	0.0315573
29.48	25.2437	25.3949	37.0214	-0.00408558
29.5	24.1964	25.3949	37.0214	-0.0323733
29.52	23.3448	25.3949	37.0214	-0.0553761
29.54	22.638	25.3949	37.0214	-0.0744678
29.56	22.0419	25.3949	37.0214	-0.0905693
29.58	21.533	25.3949	37.0214	-0.104316
29.6	21.0943	25.3949	37.0214	-0.116165
29.62	20.7133	25.3949	37.0214	-0.126456
29.64	20.3803	25.3949	37.0214	-0.135453
29.66	20.0874	25.3949	37.0214	-0.143363
29.68	19.8286	25.3949	37.0214	-0.150354
29.7	19.5989	25.3949	37.0214	-0.156559
29.72	19.3941	25.3949	37.0214	-0.162091
29.74	19.2109	25.3949	37.0214	-0.16704
29.76	19.0464	25.3949	37.0214	-0.171482
29.78	18.8984	25.3949	37.0214	-0.17548
29.8	18.7648	25.3949	37.0214	-0.179088
29.82	18.6178	25.3949	37.0214	-0.183059
29.84	18.5087	25.3949	37.0214	-0.186008
29.86	18.4096	25.3949	37.0214	-0.188683
29.88	18.3067	25.3949	37.0214	-0.191464
29.9	18.2251	25.3949	37.0214	-0.193667
29.92	18.151	25.3949	37.0214	-0.195668
29.94	18.0837	25.3949	37.0214	-0.197487
29.96	18.0226	25.3949	37.0214	-0.199137
29.98	17.9672	25.3949	37.0214	-0.200633
30	17.9171	25.3949	37.0214	-0.201986
30.02	17.8719	25.3949	37.0214	-0.203206
30.04	17.8313	25.3949	37.0214	-0.204303
30.06	17.795	25.3949	37.0214	-0.205285
30.08	17.7627	25.3949	37.0214	-0.206158
30.1	17.7342	25.3949	37.0214	-0.206928
30.12	17.7093	25.3949	37.0214	-0.2076
30.14	17.6879	25.3949	37.0214	-0.208179
30.16	17.6697	25.3949	37.0214	-0.208669
30.18	17.6548	25.3949	37.0214	-0.209073
30.2	17.6429	25.3949	37.0214	-0.209393
30.22	17.634	25.3949	37.0214	-0.209633
30.24	17.628	25.3949	37.0214	-0.209795
30.26	17.6249	25.3949	37.0214	-0.209879
30.28	17.6246	25.3949	37.0214	-0.209888
30.3	17.627	25.3949	37.0214	-0.209822
30.32	17.6322	25.3949	37.0214	-0.209682
30.34	17.6401	25.3949	37.0214	-0.209468
30.36	17.6508	25.3949	37.0214	-0.20918
30.38	17.6641	25.3949	37.0214	-0.208819
30.4	17.6915	25.3949	37.0214	-0.208081
30.42	17.7104	25.3949	37.0214	-0.207569
30.44	17.7322	25.3949	37.0214	-0.206982
30.46	17.7568	25.3949	37.0214	-0.206317
30.48	17.7843	25.3949	37.0214	-0.205575
30.5	17.8203	25.3949	37.0214	-0.204602
30.52	17.8537	25.3949	37.0214	-0.203698
30.54	17.8903	25.3949	37.0214	-0.20271
30.56	17.9301	25.3949	37.0214	-0.201637
30.58	17.9731	25.3949	37.0214	-0.200475
30.6	18.0194	25.3949	37.0214	-0.199222
30.62	18.0693	25.3949	37.0214	-0.197875
30.64	18.1228	25.3949	37.0214	-0.196431
30.66	18.18	25.3949	37.0214	-0.194885
30.68	18.2412	25.3949	37.0214	-0.193233
30.7	18.3064	25.3949	37.0214	-0.191472
30.72	18.3758	25.3949	37.0214	-0.189596
30.74	18.4497	25.3949	37.0214	-0.1876
30.76	18.5283	25.3949	37.0214	-0.185478
30.78	18.6117	25.3949	37.0214	-0.183225
30.8	18.7002	25.3949	37.0214	-0.180834
30.82	18.7941	25.3949	37.0214	-0.178297
30.84	18.8937	25.3949	37.0214	-0.175607
30.86	18.9993	25.3949	37.0214	-0.172755
30.88	19.1112	25.3949	37.0214	-0.169732
30.9	19.2298	25.3949	37.0214	-0.166528
30.92	19.3556	25.3949	37.0214	-0.163132
30.94	19.4888	25.3949	37.0214	-0.159532
30.96	19.6301	25.3949	37.0214	-0.155716
30.98	19.7799	25.3949	37.0214	-0.151668
31	19.9389	25.3949	37.0214	-0.147375
31.02	20.1076	25.3949	37.0214	-0.142819
31.04	20.2867	25.3949	37.0214	-0.137982
31.06	20.4769	25.3949	37.0214	-0.132842
31.08	20.6792	25.3949	37.0214	-0.127379
31.1	20.8943	25.3949	37.0214	-0.121568
31.12	21.1234	25.3949	37.0214	-0.11538
31.14	21.3675	25.3949	37.0214	-0.108788
31.16	21.6277	25.3949	37.0214	-0.101757
31.18	21.9057	25.3949	37.0214	-0.0942504
31.2	22.2027	25.3949	37.0214	-0.0862277
31.22	22.5205	25.3949	37.0214	-0.0776432
31.24	22.861	25.3949	37.0214	-0.0684456
31.26	23.2263	25.3949	37.0214	-0.0585773
31.28	23.6189	25.3949	37.0214	-0.0479742
31.3	24.0413	25.3949	37.0214	-0.0365635
31.32	24.4967	25.3949	37.0214	-0.0242631
31.34	24.9885	25.3949	37.0214	-0.0109789
31.36	25.5206	25.3949	37.0214	0.00339495
31.38	26.0976	25.3949	37.0214	0.0189802
31.4	26.7246	25.3949	37.0214	0.0359167
31.42	27.4076	25.3949	37.0214	0.0543654
31.44	28.1535	25.3949	37.0214	0.0745127
31.46	28.9703	25.3949	37.0214	0.096575
31.48	29.8673	25.3949	37.0214	0.120806
31.5	30.8556	25.3949	37.0214	0.147501
31.52	31.9482	25.3949	37.0214	0.177013
31.54	33.1604	25.3949	37.0214	0.209757
31.56	34.5108	25.3949	37.0214	0.246231
31.58	36.0213	25.3949	37.0214	0.287033
31.6	37.719	25.3949	37.0214	0.332889
31.62	39.6364	25.3949	37.0214	0.384682
31.64	41.8139	25.3949	37.0214	0.4435
31.66	44.3015	25.3949	37.0214	0.510694
31.68	47.1618	25.3949	37.0214	0.587953
31.7	50.474	25.3949	37.0214	0.677419
31.72	54.3396	25.3949	37.0214	0.781836
31.74	58.8908	25.3949	37.0214	0.90477
31.76	64.3024	25.3949	37.0214	1.05094
31.78	70.811	25.3949	37.0214	1.22675
31.8	78.7457	25.3949	37.0214	1.44108
31.82	88.5746	25.3949	37.0214	1.70657
31.84	100.975	25.3949	37.0214	2.04152
31.86	116.929	25.3949	37.0214	2.47245
31.88	137.837	25.3949	37.0214	3.0372
31.9	165.633	25.3949	37.0214	3.78802
31.92	202.851	25.3949	37.0214	4.79332
31.94	252.521	25.3949	37.0214	6.13498
31.96	317.538	25.3949	37.0214	7.89119
31.98	398.567	25.3949	37.0214	10.0799
32	489.136	25.3949	37.0214	12.5263
32.02	569.84	25.3949	37.0214	14.7062
32.04	613.396	25.3949	37.0214	15.8827
32.06	593.129	25.3949	37.0214	15.3353
32.08	537.894	25.3949	37.0214	13.8433
32.1	481.485	25.3949	37.0214	12.3196
32.12	425.3	25.3949	37.0214	10.802
32.14	355.203	25.3949	37.0214	8.90856
32.16	280.067	25.3949	37.0214	6.87905
32.18	217.512	25.3949	37.0214	5.18936
32.2	172.279	25.3949	37.0214	3.96754
32.22	142.168	25.3949	37.0214	3.15421
32.24	123.577	25.3949	37.0214	2.65203
32.26	113.4	25.3949	37.0214	2.37715
32.28	109.546	25.3949	37.0214	2.27305
32.3	110.973	25.3949	37.0214	2.31158
32.32	117.519	25.3949	37.0214	2.4884
32.34	129.664	25.3949	37.0214	2.81644
32.36	148.202	25.3949	37.0214	3.31719
32.38	173.597	25.3949	37.0214	4.00315
32.4	204.454	25.3949	37.0214	4.83663
32.42	235.066	25.3949	37.0214	5.66351
32.44	255.338	25.3949	37.0214	6.21109
32.46	254.162	25.3949	37.0214	6.17932
32.48	234.372	25.3949	37.0214	5.64476
32.5	212.11	25.3949	37.0214	5.04344
32.52	191.256	25.3949	37.0214	4.48015
32.54	167.301	25.3949	37.0214	3.83309
32.56	138.631	25.3949	37.0214	3.05867
32.58	112.681	25.3949	37.0214	2.35773
32.6	92.9892	25.3949	37.0214	1.82581
32.62	79.3158	25.3949	37.0214	1.45648
32.64	70.3035	25.3949	37.0214	1.21304
32.66	64.5851	25.3949	37.0214	1.05858
32.68	61.0913	25.3949	37.0214	0.964208
32.7	59.0973	25.3949	37.0214	0.910348
32.72	58.1633	25.3949	37.0214	0.885118
32.74	58.0428	25.3949	37.0214	0.881863
32.76	58.6066	25.3949	37.0214	0.897093
32.78	59.7949	25.3949	37.0214	0.92919
32.8	61.5923	25.3949	37.0214	0.977742
32.82	64.0174	25.3949	37.0214	1.04325
32.84	67.1176	25.3949	37.0214	1.12699
32.86	70.9676	25.3949	37.0214	1.23098
32.88	75.668	25.3949	37.0214	1.35794
32.9	81.3424	25.3949	37.0214	1.51122
32.92	88.131	25.3949	37.0214	1.69459
32.94	96.1814	25.3949	37.0214	1.91204
32.96	105.641	25.3949	37.0214	2.16756
32.98	116.662	25.3949	37.0214	2.46524
33	129.438	25.3949	37.0214	2.81034
33.02	144.3	25.3949	37.0214	3.2118
33.04	161.882	25.3949	37.0214	3.68671
33.06	183.326	25.3949	37.0214	4.26593
33.08	210.414	25.3949	37.0214	4.99762
33.1	245.338	25.3949	37.0214	5.94096
33.12	289.581	25.3949	37.0214	7.13604
33.14	341.498	25.3949	37.0214	8.53839
33.16	393.201	25.3949	37.0214	9.93495
33.18	431.11	25.3949	37.0214	10.9589
33.2	438.988	25.3949	37.0214	11.1717
33.22	407.945	25.3949	37.0214	10.3332
33.24	367.306	25.3949	37.0214	9.2355
33.26	330.905	25.3949	37.0214	8.25224
33.28	294.054	25.3949	37.0214	7.25686
33.3	245.694	25.3949	37.0214	5.95059
33.32	196.234	25.3949	37.0214	4.61459
33.34	155.947	25.3949	37.0214	3.52639
33.36	126.264	25.3949	37.0214	2.72462
33.38	104.96	25.3949	37.0214	2.14915
33.4	89.5788	25.3949	37.0214	1.73369
33.42	78.297	25.3949	37.0214	1.42896
33.44	69.8846	25.3949	37.0214	1.20173
33.46	63.524	25.3949	37.0214	1.02992
33.48	58.664	25.3949	37.0214	0.898644
33.5	54.9251	25.3949	37.0214	0.797651
33.52	52.0414	25.3949	37.0214	0.719759
33.54	49.8237	25.3949	37.0214	0.659854
33.56	48.1351	25.3949	37.0214	0.614244
33.58	46.8755	25.3949	37.0214	0.58022
33.6	45.9703	25.3949	37.0214	0.55577
33.62	45.3632	25.3949	37.0214	0.53937
33.64	44.9878	25.3949	37.0214	0.529231
33.66	44.8561	25.3949	37.0214	0.525673
33.68	44.9174	25.3949	37.0214	0.52733
33.7	45.1375	25.3949	37.0214	0.533274
33.72	45.5194	25.3949	37.0214	0.543589
33.74	46.0335	25.3949	37.0214	0.557475
33.76	46.6625	25.3949	37.0214	0.574467
33.78	47.3897	25.3949	37.0214	0.594109
33.8	48.1977	25.3949	37.0214	0.615935
33.82	49.069	25.3949	37.0214	0.639468
33.84	49.9854	25.3949	37.0214	0.664223
33.86	50.929	25.3949	37.0214	0.689711
33.88	51.8824	25.3949	37.0214	0.715464
33.9	52.8301	25.3949	37.0214	0.741061
33.92	53.7597	25.3949	37.0214	0.76617
33.94	54.6638	25.3949	37.0214	0.790592
33.96	55.5423	25.3949	37.0214	0.814322
33.98	56.4044	25.3949	37.0214	0.837609
34	57.2712	25.3949	37.0214	0.861021
34.02	58.1774	25.3949	37.0214	0.885499
34.04	59.1733	25.3949	37.0214	0.912401
34.06	60.3251	25.3949	37.0214	0.943512
34.08	61.7135	25.3949	37.0214	0.981016
34.1	63.431	25.3949	37.0214	1.02741
34.12	65.5751	25.3949	37.0214	1.08532
34.14	68.2385	25.3949	37.0214	1.15726
34.16	71.4956	25.3949	37.0214	1.24524
34.18	75.3848	25.3949	37.0214	1.3503
34.2	79.8881	25.3949	37.0214	1.47194
34.22	84.9125	25.3949	37.0214	1.60765
34.24	90.2757	25.3949	37.0214	1.75252
34.26	95.7048	25.3949	37.0214	1.89917
34.28	100.852	25.3949	37.0214	2.0382
34.3	105.333	25.3949	37.0214	2.15923
34.32	108.778	25.3949	37.0214	2.25229
34.34	109.923	25.3949	37.0214	2.28323
34.36	100.968	25.3949	37.0214	2.04134
34.38	87.6859	25.3949	37.0214	1.68257
34.4	76.087	25.3949	37.0214	1.36926
34.42	67.4228	25.3949	37.0214	1.13523
34.44	58.1583	25.3949	37.0214	0.884984
34.46	47.2372	25.3949	37.0214	0.589989
34.48	37.9032	25.3949	37.0214	0.337865
34.5	31.0674	25.3949	37.0214	0.153221
34.52	26.3694	25.3949	37.0214	0.0263211
34.54	23.2065	25.3949	37.0214	-0.0591115
34.56	21.0555	25.3949	37.0214	-0.117214
34.58	19.5425	25.3949	37.0214	-0.158083
34.6	18.4312	25.3949	37.0214	-0.188099
34.62	17.5827	25.3949	37.0214	-0.21102
34.64	16.9154	25.3949	37.0214	-0.229045
34.66	16.3793	25.3949	37.0214	-0.243523
34.68	15.9419	25.3949	37.0214	-0.25534
34.7	15.5802	25.3949	37.0214	-0.265109
34.72	15.2781	25.3949	37.0214	-0.273269
34.74	15.0235	25.3949	37.0214	-0.280146
34.76	14.8074	25.3949	37.0214	-0.285984
34.78	14.6229	25.3949	37.0214	-0.290967
34.8	14.4648	25.3949	37.0214	-0.295238
34.82	14.3289	25.3949	37.0214	-0.298909
34.84	14.212	25.3949	37.0214	-0.302067
34.86	14.1114	25.3949	37.0214	-0.304783
34.88	14.0253	25.3949	37.0214	-0.307111
34.9	13.9518	25.3949	37.0214	-0.309095
34.92	13.8897	25.3949	37.0214	-0.310773
34.94	13.8379	25.3949	37.0214	-0.31217
34.96	13.7957	25.3949	37.0214	-0.313311
34.98	13.7623	25.3949	37.0214	-0.314212
35	13.7374	25.3949	37.0214	-0.314887
35.02	13.7204	25.3949	37.0214	-0.315345
35.04	13.7113	25.3949	37.0214	-0.315592
35.06	13.7098	25.3949	37.0214	-0.315631
35.08	13.7161	25.3949	37.0214	-0.315462
35.1	13.7302	25.3949	37.0214	-0.315082
35.12	13.7523	25.3949	37.0214	-0.314484
35.14	13.7828	25.3949	37.0214	-0.313661
35.16	13.8221	25.3949	37.0214	-0.312598
35.18	13.8709	25.3949	37.0214	-0.31128
35.2	13.781	25.3949	37.0214	-0.313708
35.22	13.8531	25.3949	37.0214	-0.311762
35.24	13.9374	25.3949	37.0214	-0.309484
35.26	14.0355	25.3949	37.0214	-0.306835
35.28	14.0749	25.3949	37.0214	-0.30577
35.3	14.2069	25.3949	37.0214	-0.302205
35.32	14.3589	25.3949	37.0214	-0.298098
35.34	14.5342	25.3949	37.0214	-0.293365
35.36	14.7363	25.3949	37.0214	-0.287903
35.38	14.9701	25.3949	37.0214	-0.281589
35.4	15.2411	25.3949	37.0214	-0.27427
35.42	15.556	25.3949	37.0214	-0.265763
35.44	15.9232	25.3949	37.0214	-0.255845
35.46	16.3524	25.3949	37.0214	-0.244252
35.48	16.8554	25.3949	37.0214	-0.230665
35.5	17.4464	25.3949	37.0214	-0.2147
35.52	18.1431	25.3949	37.0214	-0.195882
35.54	18.9677	25.3949	37.0214	-0.173608
35.56	19.9502	25.3949	37.0214	-0.14707
35.58	21.0759	25.3949	37.0214	-0.116663
35.6	22.5131	25.3949	37.0214	-0.077841
35.62	24.2805	25.3949	37.0214	-0.0301024
35.64	26.468	25.3949	37.0214	0.0289847
35.66	29.1335	25.3949	37.0214	0.100984
35.68	32.3623	25.3949	37.0214	0.188199
35.7	36.0036	25.3949	37.0214	0.286554
35.72	39.6685	25.3949	37.0214	0.385548
35.74	42.6966	25.3949	37.0214	0.467341
35.76	44.3257	25.3949	37.0214	0.511345
35.78	41.7516	25.3949	37.0214	0.441815
35.8	36.6784	25.3949	37.0214	0.304783
35.82	32.1075	25.3949	37.0214	0.181316
35.84	28.9377	25.3949	37.0214	0.0956945
35.86	26.3041	25.3949	37.0214	0.0245573
35.88	22.5596	25.3949	37.0214	-0.0765871
35.9	18.8495	25.3949	37.0214	-0.176801
35.92	16.078	25.3949	37.0214	-0.251662
35.94	14.4009	25.3949	37.0214	-0.296965
35.96	13.531	25.3949	37.0214	-0.320462
35.98	13.1047	25.3949	37.0214	-0.331976
36	12.8791	25.3949	37.0214	-0.338071
36.02	12.7902	25.3949	37.0214	-0.340472
36.04	12.6928	25.3949	37.0214	-0.343103
36.06	12.6204	25.3949	37.0214	-0.345056
36.08	12.5655	25.3949	37.0214	-0.346542
36.1	12.5233	25.3949	37.0214	-0.347682
36.12	12.516	25.3949	37.0214	-0.347878
36.14	12.4913	25.3949	37.0214	-0.348544
36.16	12.4727	25.3949	37.0214	-0.349048
36.18	12.4589	25.3949	37.0214	-0.34942
36.2	12.4491	25.3949	37.0214	-0.349686
36.22	12.4426	25.3949	37.0214	-0.349862
36.24	12.4388	25.3949	37.0214	-0.349963
36.26	12.4375	25.3949	37.0214	-0.349999
36.28	12.4382	25.3949	37.0214	-0.34998
36.3	12.4407	25.3949	37.0214	-0.349913
36.32	12.4448	25.3949	37.0214	-0.349802
36.34	12.4503	25.3949	37.0214	-0.349652
36.36	12.4571	25.3949	37.0214	-0.349469
36.38	12.4651	25.3949	37.0214	-0.349252
36.4	12.4742	25.3949	37.0214	-0.349006
36.42	12.4843	25.3949	37.0214	-0.348733
36.44	12.4954	25.3949	37.0214	-0.348433
36.46	12.5075	25.3949	37.0214	-0.348109
36.48	12.5204	25.3949	37.0214	-0.34776
36.5	12.5341	25.3949	37.0214	-0.347388
36.52	12.4166	25.3949	37.0214	-0.350564
36.54	12.4336	25.3949	37.0214	-0.350104
36.56	12.4514	25.3949	37.0214	-0.349622
36.58	12.4701	25.3949	37.0214	-0.349119
36.6	12.4236	25.3949	37.0214	-0.350373
36.62	12.4447	25.3949	37.0214	-0.349803
36.64	12.4667	25.3949	37.0214	-0.349211
36.66	12.4895	25.3949	37.0214	-0.348594
36.68	12.5132	25.3949	37.0214	-0.347953
36.7	12.5379	25.3949	37.0214	-0.347287
36.72	12.5635	25.3949	37.0214	-0.346593
36.74	12.5903	25.3949	37.0214	-0.345871
36.76	12.6181	25.3949	37.0214	-0.345119
36.78	12.6472	25.3949	37.0214	-0.344334
36.8	12.6776	25.3949	37.0214	-0.343514
36.82	12.7093	25.3949	37.0214	-0.342657
36.84	12.7425	25.3949	37.0214	-0.34176
36.86	12.7774	25.3949	37.0214	-0.340818
36.88	12.814	25.3949	37.0214	-0.339828
36.9	12.8527	25.3949	37.0214	-0.338784
36.92	12.8935	25.3949	37.0214	-0.33768
36.94	12.937	25.3949	37.0214	-0.336506
36.96	12.9834	25.3949	37.0214	-0.335251
36.98	13.0335	25.3949	37.0214	-0.3339
37	13.0879	25.3949	37.0214	-0.332431
37.02	13.1477	25.3949	37.0214	-0.330814
37.04	13.2147	25.3949	37.0214	-0.329005
37.06	13.2909	25.3949	37.0214	-0.326947
37.08	13.3793	25.3949	37.0214	-0.324558
37.1	13.4841	25.3949	37.0214	-0.321727
37.12	13.6109	25.3949	37.0214	-0.318302
37.14	13.767	25.3949	37.0214	-0.314086
37.16	13.9619	25.3949	37.0214	-0.308821
37.18	14.2078	25.3949	37.0214	-0.302181
37.2	14.5194	25.3949	37.0214	-0.293763
37.22	14.9148	25.3949	37.0214	-0.283082
37.24	15.415	25.3949	37.0214	-0.269573
37.26	16.0434	25.3949	37.0214	-0.252598
37.28	16.8257	25.3949	37.0214	-0.231466
37.3	17.7661	25.3949	37.0214	-0.206065
37.32	18.9355	25.3949	37.0214	-0.174479
37.34	20.3344	25.3949	37.0214	-0.136693
37.36	21.981	25.3949	37.0214	-0.0922137
37.38	23.8751	25.3949	37.0214	-0.0410531
37.4	26.0396	25.3949	37.0214	0.0174133
37.42	28.4615	25.3949	37.0214	0.0828322
37.44	31.0935	25.3949	37.0214	0.153925
37.46	33.9022	25.3949	37.0214	0.229794
37.48	36.827	25.3949	37.0214	0.308796
37.5	39.7892	25.3949	37.0214	0.388808
37.52	42.6986	25.3949	37.0214	0.467396
37.54	45.4356	25.3949	37.0214	0.541327
37.56	47.8871	25.3949	37.0214	0.607546
37.58	49.9353	25.3949	37.0214	0.662869
37.6	51.4748	25.3949	37.0214	0.704454
37.62	52.372	25.3949	37.0214	0.728687
37.64	52.2994	25.3949	37.0214	0.726726
37.66	51.2545	25.3949	37.0214	0.698502
37.68	49.3542	25.3949	37.0214	0.647173
37.7	46.7731	25.3949	37.0214	0.577454
37.72	43.674	25.3949	37.0214	0.493743
37.74	40.1417	25.3949	37.0214	0.398331
37.76	36.3947	25.3949	37.0214	0.297119
37.78	32.6456	25.3949	37.0214	0.19585
37.8	29.0742	25.3949	37.0214	0.0993834
37.82	25.8171	25.3949	37.0214	0.0114041
37.84	22.9628	25.3949	37.0214	-0.0656961
37.86	20.5537	25.3949	37.0214	-0.130769
37.88	18.5926	25.3949	37.0214	-0.183739
37.9	17.0519	25.3949	37.0214	-0.225357
37.92	15.8833	25.3949	37.0214	-0.256923
37.94	15.0279	25.3949	37.0214	-0.280029
37.96	14.4243	25.3949	37.0214	-0.296333
37.98	14.0147	25.3949	37.0214	-0.307396
38	13.7485	25.3949	37.0214	-0.314586
38.02	13.5843	25.3949	37.0214	-0.319021
38.04	13.4899	25.3949	37.0214	-0.321571
38.06	13.4415	25.3949	37.0214	-0.322879
38.08	13.4223	25.3949	37.0214	-0.323396
38.1	13.4212	25.3949	37.0214	-0.323428
38.12	13.4307	25.3949	37.0214	-0.323172
38.14	13.4464	25.3949	37.0214	-0.322748
38.16	13.4655	25.3949	37.0214	-0.322229
38.18	13.4867	25.3949	37.0214	-0.321657
38.2	13.5091	25.3949	37.0214	-0.321054
38.22	13.5321	25.3949	37.0214	-0.320432
38.24	13.5556	25.3949	37.0214	-0.319795
38.26	13.5761	25.3949	37.0214	-0.319244
38.28	13.6005	25.3949	37.0214	-0.318585
38.3	13.6252	25.3949	37.0214	-0.317916
38.32	13.6503	25.3949	37.0214	-0.317238
38.34	13.674	25.3949	37.0214	-0.316598
38.36	13.6999	25.3949	37.0214	-0.315898
38.38	13.7263	25.3949	37.0214	-0.315187
38.4	13.753	25.3949	37.0214	-0.314463
38.42	13.7803	25.3949	37.0214	-0.313728
38.44	13.808	25.3949	37.0214	-0.312979
38.46	13.8363	25.3949	37.0214	-0.312216
38.48	13.8651	25.3949	37.0214	-0.311438
38.5	13.8945	25.3949	37.0214	-0.310644
38.52	13.9245	25.3949	37.0214	-0.309833
38.54	13.9551	25.3949	37.0214	-0.309005
38.56	13.9865	25.3949	37.0214	-0.308157
38.58	14.0186	25.3949	37.0214	-0.307289
38.6	14.0516	25.3949	37.0214	-0.3064
38.62	14.0854	25.3949	37.0214	-0.305487
38.64	14.1201	25.3949	37.0214	-0.304549
38.66	14.1558	25.3949	37.0214	-0.303585
38.68	14.1925	25.3949	37.0214	-0.302592
38.7	14.2304	25.3949	37.0214	-0.301569
38.72	14.2695	25.3949	37.0214	-0.300512
38.74	14.31	25.3949	37.0214	-0.29942
38.76	14.3519	25.3949	37.0214	-0.298289
38.78	14.3953	25.3949	37.0214	-0.297116
38.8	14.4404	25.3949	37.0214	-0.295896
38.82	14.4874	25.3949	37.0214	-0.294627
38.84	14.5364	25.3949	37.0214	-0.293303
38.86	14.5877	25.3949	37.0214	-0.291919
38.88	14.6414	25.3949	37.0214	-0.290469
38.9	14.6978	25.3949	37.0214	-0.288945
38.92	14.7572	25.3949	37.0214	-0.28734
38.94	14.82	25.3949	37.0214	-0.285643
38.96	14.8866	25.3949	37.0214	-0.283844
38.98	14.9575	25.3949	37.0214	-0.281929
39	15.0333	25.3949	37.0214	-0.279882
39.02	15.1147	25.3949	37.0214	-0.277684
39.04	15.2025	25.3949	37.0214	-0.275311
39.06	15.2979	25.3949	37.0214	-0.272735
39.08	15.4022	25.3949	37.0214	-0.269918
39.1	15.5171	25.3949	37.0214	-0.266814
39.12	15.6448	25.3949	37.0214	-0.263365
39.14	15.7882	25.3949	37.0214	-0.25949
39.16	15.9513	25.3949	37.0214	-0.255086
39.18	16.1393	25.3949	37.0214	-0.250007
39.2	16.3598	25.3949	37.0214	-0.244051
39.22	16.6236	25.3949	37.0214	-0.236925
39.24	16.9469	25.3949	37.0214	-0.228192
39.26	17.3547	25.3949	37.0214	-0.217177
39.28	17.8871	25.3949	37.0214	-0.202796
39.3	18.6099	25.3949	37.0214	-0.183274
39.32	19.6281	25.3949	37.0214	-0.155771
39.34	21.1042	25.3949	37.0214	-0.115899
39.36	23.3265	25.3949	37.0214	-0.055871
39.38	26.9721	25.3949	37.0214	0.0426006
39.4	33.1561	25.3949	37.0214	0.20964
39.42	39.8488	25.3949	37.0214	0.390418
39.44	38.6613	25.3949	37.0214	0.358343
39.46	33.3542	25.3949	37.0214	0.21499
39.48	31.9829	25.3949	37.0214	0.177949
39.5	33.6846	25.3949	37.0214	0.223916
39.52	35.7979	25.3949	37.0214	0.280998
39.54	34.0437	25.3949	37.0214	0.233616
39.56	29.7897	25.3949	37.0214	0.118709
39.58	27.3948	25.3949	37.0214	0.0540181
39.6	26.3738	25.3949	37.0214	0.0264392
39.62	25.6067	25.3949	37.0214	0.00571928
39.64	24.9267	25.3949	37.0214	-0.0126466
39.66	24.4793	25.3949	37.0214	-0.0247317
39.68	24.3278	25.3949	37.0214	-0.0288248
39.7	24.4528	25.3949	37.0214	-0.0254494
39.72	24.8214	25.3949	37.0214	-0.0154917
39.74	25.4165	25.3949	37.0214	0.000583606
39.76	26.2402	25.3949	37.0214	0.0228313
39.78	27.3123	25.3949	37.0214	0.0517899
39.8	28.6713	25.3949	37.0214	0.0884984
39.82	30.3781	25.3949	37.0214	0.134601
39.84	32.524	25.3949	37.0214	0.192565
39.86	35.2445	25.3949	37.0214	0.266051
39.88	38.7397	25.3949	37.0214	0.360461
39.9	43.3011	25.3949	37.0214	0.483671
39.92	49.3424	25.3949	37.0214	0.646856
39.94	57.4267	25.3949	37.0214	0.865221
39.96	68.2737	25.3949	37.0214	1.15821
39.98	82.7103	25.3949	37.0214	1.54817
40	101.448	25.3949	37.0214	2.05429
40.02	124.406	25.3949	37.0214	2.67443
40.04	149.253	25.3949	37.0214	3.34559
40.06	169.969	25.3949	37.0214	3.90514
40.08	179.238	25.3949	37.0214	4.15553
40.1	175.836	25.3949	37.0214	4.06362
40.12	164.235	25.3949	37.0214	3.75026
40.14	149.754	25.3949	37.0214	3.35911
40.16	134.828	25.3949	37.0214	2.95594
40.18	118.602	25.3949	37.0214	2.51765
40.2	100.516	25.3949	37.0214	2.02913
40.22	81.8349	25.3949	37.0214	1.52452
40.24	64.3558	25.3949	37.0214	1.05239
40.26	49.5127	25.3949	37.0214	0.651455
40.28	38.0373	25.3949	37.0214	0.341488
40.3	29.9503	25.3949	37.0214	0.123046
40.32	24.7282	25.3949	37.0214	-0.0180081
40.34	21.5961	25.3949	37.0214	-0.102611
40.36	19.804	25.3949	37.0214	-0.151019
40.38	18.7825	25.3949	37.0214	-0.17861
40.4	18.1703	25.3949	37.0214	-0.195147
40.42	17.7682	25.3949	37.0214	-0.206008
40.44	17.4778	25.3949	37.0214	-0.213854
40.46	17.2531	25.3949	37.0214	-0.219922
40.48	17.0725	25.3949	37.0214	-0.2248
40.5	16.9248	25.3949	37.0214	-0.228791
40.52	16.8029	25.3949	37.0214	-0.232083
40.54	16.7021	25.3949	37.0214	-0.234807
40.56	16.6186	25.3949	37.0214	-0.23706
40.58	16.5498	25.3949	37.0214	-0.23892
40.6	16.4959	25.3949	37.0214	-0.240376
40.62	16.4498	25.3949	37.0214	-0.241622
40.64	16.4126	25.3949	37.0214	-0.242626
40.66	16.3832	25.3949	37.0214	-0.243421
40.68	16.3604	25.3949	37.0214	-0.244034
40.7	16.3436	25.3949	37.0214	-0.244489
40.72	16.3319	25.3949	37.0214	-0.244805
40.74	16.3261	25.3949	37.0214	-0.244961
40.76	16.323	25.3949	37.0214	-0.245044
40.78	16.3236	25.3949	37.0214	-0.24503
40.8	16.3273	25.3949	37.0214	-0.244929
40.82	16.334	25.3949	37.0214	-0.244749
40.84	16.3433	25.3949	37.0214	-0.244498
40.86	16.3549	25.3949	37.0214	-0.244184
40.88	16.3687	25.3949	37.0214	-0.243811
40.9	16.3844	25.3949	37.0214	-0.243386
40.92	16.402	25.3949	37.0214	-0.242913
40.94	16.4211	25.3949	37.0214	-0.242395
40.96	16.4418	25.3949	37.0214	-0.241837
40.98	16.4638	25.3949	37.0214	-0.241243
41	16.4871	25.3949	37.0214	-0.240614
41.02	16.5115	25.3949	37.0214	-0.239954
41.04	16.537	25.3949	37.0214	-0.239266
41.06	16.5634	25.3949	37.0214	-0.238552
41.08	16.5908	25.3949	37.0214	-0.237813
41.1	16.6189	25.3949	37.0214	-0.237052
41.12	16.6478	25.3949	37.0214	-0.236272
41.14	16.6774	25.3949	37.0214	-0.235472
41.16	16.7076	25.3949	37.0214	-0.234656
41.18	16.7384	25.3949	37.0214	-0.233825
41.2	16.7697	25.3949	37.0214	-0.23298
41.22	16.8014	25.3949	37.0214	-0.232122
41.24	16.8336	25.3949	37.0214	-0.231254
41.26	16.8661	25.3949	37.0214	-0.230376
41.28	16.8989	25.3949	37.0214	-0.229489
41.3	16.932	25.3949	37.0214	-0.228596
41.32	16.9653	25.3949	37.0214	-0.227696
41.34	16.9988	25.3949	37.0214	-0.226791
41.36	17.0325	25.3949	37.0214	-0.225882
41.38	17.0662	25.3949	37.0214	-0.224971
41.4	17.1	25.3949	37.0214	-0.224058
41.42	17.1338	25.3949	37.0214	-0.223144
41.44	17.1676	25.3949	37.0214	-0.22223
41.46	17.2014	25.3949	37.0214	-0.221318
41.48	17.2351	25.3949	37.0214	-0.220408
41.5	17.2687	25.3949	37.0214	-0.219502
41.52	17.3021	25.3949	37.0214	-0.218599
41.54	17.3353	25.3949	37.0214	-0.217702
41.56	17.3683	25.3949	37.0214	-0.216811
41.58	17.401	25.3949	37.0214	-0.215926
41.6	17.4335	25.3949	37.0214	-0.21505
41.62	17.4656	25.3949	37.0214	-0.214182
41.64	17.4974	25.3949	37.0214	-0.213323
41.66	17.5288	25.3949	37.0214	-0.212475
41.68	17.5413	25.3949	37.0214	-0.212137
41.7	17.5722	25.3949	37.0214	-0.211303
41.72	17.6026	25.3949	37.0214	-0.210483
41.74	17.6324	25.3949	37.0214	-0.209675
41.76	17.6618	25.3949	37.0214	-0.208883
41.78	17.6814	25.3949	37.0214	-0.208353
41.8	17.7098	25.3949	37.0214	-0.207587
41.82	17.7375	25.3949	37.0214	-0.206837
41.84	17.7647	25.3949	37.0214	-0.206104
41.86	17.7912	25.3949	37.0214	-0.205388
41.88	17.817	25.3949	37.0214	-0.20469
41.9	17.8422	25.3949	37.0214	-0.204011
41.92	17.8666	25.3949	37.0214	-0.203349
41.94	17.8905	25.3949	37.0214	-0.202706
41.96	17.9138	25.3949	37.0214	-0.202077
41.98	17.9369	25.3949	37.0214	-0.201453
42	17.961	25.3949	37.0214	-0.2008
42.02	17.9898	25.3949	37.0214	-0.200023
42.04	18.0326	25.3949	37.0214	-0.198866
42.06	18.1121	25.3949	37.0214	-0.196718
42.08	18.2766	25.3949	37.0214	-0.192277
42.1	18.6171	25.3949	37.0214	-0.183078
42.12	19.2845	25.3949	37.0214	-0.165052
42.14	20.4909	25.3949	37.0214	-0.132464
42.16	22.4792	25.3949	37.0214	-0.078758
42.18	25.444	25.3949	37.0214	0.00132534
42.2	29.4169	25.3949	37.0214	0.108638
42.22	34.1597	25.3949	37.0214	0.236749
42.24	39.1368	25.3949	37.0214	0.371187
42.26	43.6164	25.3949	37.0214	0.492188
42.28	46.8878	25.3949	37.0214	0.580553
42.3	47.5242	25.3949	37.0214	0.597741
42.32	41.9979	25.3949	37.0214	0.44847
42.34	35.457	25.3949	37.0214	0.271791
42.36	32.0491	25.3949	37.0214	0.179738
42.38	31.3491	25.3949	37.0214	0.160831
42.4	31.2769	25.3949	37.0214	0.15888
42.42	28.9066	25.3949	37.0214	0.0948541
42.44	24.3757	25.3949	37.0214	-0.0275312
42.46	20.6753	25.3949	37.0214	-0.127484
42.48	18.8505	25.3949	37.0214	-0.176774
42.5	18.2511	25.3949	37.0214	-0.192966
42.52	18.1018	25.3949	37.0214	-0.196998
42.54	18.0553	25.3949	37.0214	-0.198254
42.56	18.0219	25.3949	37.0214	-0.199157
42.58	17.9865	25.3949	37.0214	-0.200111
42.6	17.9477	25.3949	37.0214	-0.20116
42.62	17.9052	25.3949	37.0214	-0.202308
42.64	17.8592	25.3949	37.0214	-0.203551
42.66	17.8098	25.3949	37.0214	-0.204886
42.68	17.757	25.3949	37.0214	-0.206311
42.7	17.7011	25.3949	37.0214	-0.207821
42.72	17.6422	25.3949	37.0214	-0.209411
42.74	17.5806	25.3949	37.0214	-0.211076
42.76	17.5164	25.3949	37.0214	-0.21281
42.78	17.4498	25.3949	37.0214	-0.214609
42.8	17.381	25.3949	37.0214	-0.216466
42.82	17.3103	25.3949	37.0214	-0.218376
42.84	17.2379	25.3949	37.0214	-0.220332
42.86	17.164	25.3949	37.0214	-0.222329
42.88	17.0888	25.3949	37.0214	-0.224361
42.9	17.0125	25.3949	37.0214	-0.226422
42.92	16.9353	25.3949	37.0214	-0.228506
42.94	16.8576	25.3949	37.0214	-0.230606
42.96	16.7794	25.3949	37.0214	-0.232719
42.98	16.7009	25.3949	37.0214	-0.234837
43	16.6225	25.3949	37.0214	-0.236956
43.02	16.5442	25.3949	37.0214	-0.239071
43.04	16.4663	25.3949	37.0214	-0.241176
43.06	16.3889	25.3949	37.0214	-0.243266
43.08	16.3122	25.3949	37.0214	-0.245338
43.1	16.2363	25.3949	37.0214	-0.247387
43.12	16.1615	25.3949	37.0214	-0.249409
43.14	16.0877	25.3949	37.0214	-0.2514
43.16	16.0153	25.3949	37.0214	-0.253357
43.18	15.9442	25.3949	37.0214	-0.255277
43.2	15.8746	25.3949	37.0214	-0.257157
43.22	15.8066	25.3949	37.0214	-0.258994
43.24	15.7402	25.3949	37.0214	-0.260787
43.26	15.6756	25.3949	37.0214	-0.262532
43.28	15.6128	25.3949	37.0214	-0.264229
43.3	15.5518	25.3949	37.0214	-0.265876
43.32	15.4927	25.3949	37.0214	-0.267472
43.34	15.4356	25.3949	37.0214	-0.269016
43.36	15.3804	25.3949	37.0214	-0.270506
43.38	15.3272	25.3949	37.0214	-0.271944
43.4	15.2759	25.3949	37.0214	-0.273329
43.42	15.2266	25.3949	37.0214	-0.27466
43.44	15.1793	25.3949	37.0214	-0.275938
43.46	15.134	25.3949	37.0214	-0.277163
43.48	15.0905	25.3949	37.0214	-0.278337
43.5	15.049	25.3949	37.0214	-0.279459
43.52	15.0093	25.3949	37.0214	-0.28053
43.54	14.9715	25.3949	37.0214	-0.281552
43.56	14.9354	25.3949	37.0214	-0.282526
43.58	14.9011	25.3949	37.0214	-0.283453
43.6	14.8685	25.3949	37.0214	-0.284334
43.62	14.8375	25.3949	37.0214	-0.28517
43.64	14.8081	25.3949	37.0214	-0.285964
43.66	14.7803	25.3949	37.0214	-0.286716
43.68	14.7539	25.3949	37.0214	-0.287428
43.7	14.729	25.3949	37.0214	-0.288102
43.72	14.7054	25.3949	37.0214	-0.28874
43.74	14.6831	25.3949	37.0214	-0.289342
43.76	14.6639	25.3949	37.0214	-0.28986
43.78	14.6327	25.3949	37.0214	-0.290703
43.8	14.6141	25.3949	37.0214	-0.291207
43.82	14.5965	25.3949	37.0214	-0.291681
43.84	14.58	25.3949	37.0214	-0.292127
43.86	14.5648	25.3949	37.0214	-0.292536
43.88	14.5468	25.3949	37.0214	-0.293022
43.9	14.545	25.3949	37.0214	-0.293071
43.92	14.5749	25.3949	37.0214	-0.292265
43.94	14.7029	25.3949	37.0214	-0.288808
43.96	15.0766	25.3949	37.0214	-0.278712
43.98	15.9496	25.3949	37.0214	-0.255133
44	17.6184	25.3949	37.0214	-0.210054
44.02	20.215	25.3949	37.0214	-0.139918
44.04	23.4277	25.3949	37.0214	-0.053138
44.06	26.4187	25.3949	37.0214	0.0276547
44.08	28.1796	25.3949	37.0214	0.0752185
44.1	28.4103	25.3949	37.0214	0.0814495
44.12	27.8561	25.3949	37.0214	0.0664806
44.14	26.9616	25.3949	37.0214	0.0423181
44.16	26.0303	25.3949	37.0214	0.0171621
44.18	25.0481	25.3949	37.0214	-0.00936793
44.2	23.7718	25.3949	37.0214	-0.0438423
44.22	22.2277	25.3949	37.0214	-0.0855527
44.24	20.6421	25.3949	37.0214	-0.128381
44.26	19.0502	25.3949	37.0214	-0.171379
44.28	17.6061	25.3949	37.0214	-0.210387
44.3	16.4274	25.3949	37.0214	-0.242227
44.32	15.567	25.3949	37.0214	-0.265465
44.34	15.0058	25.3949	37.0214	-0.280625
44.36	14.689	25.3949	37.0214	-0.289182
44.38	14.5166	25.3949	37.0214	-0.29384
44.4	14.4346	25.3949	37.0214	-0.296052
44.42	14.4001	25.3949	37.0214	-0.296986
44.44	14.3905	25.3949	37.0214	-0.297246
44.46	14.3998	25.3949	37.0214	-0.296993
44.48	14.4365	25.3949	37.0214	-0.296004
44.5	14.5239	25.3949	37.0214	-0.293641
44.52	14.703	25.3949	37.0214	-0.288803
44.54	15.0304	25.3949	37.0214	-0.279961
44.56	15.5676	25.3949	37.0214	-0.26545
44.58	16.3578	25.3949	37.0214	-0.244104
44.6	17.394	25.3949	37.0214	-0.216117
44.62	18.5934	25.3949	37.0214	-0.18372
44.64	19.7982	25.3949	37.0214	-0.151176
44.66	20.8135	25.3949	37.0214	-0.123752
44.68	21.4719	25.3949	37.0214	-0.105965
44.7	21.7909	25.3949	37.0214	-0.0973499
44.72	21.9454	25.3949	37.0214	-0.0931772
44.74	21.9307	25.3949	37.0214	-0.0935724
44.76	21.7227	25.3949	37.0214	-0.0991913
44.78	21.2906	25.3949	37.0214	-0.110864
44.8	20.62	25.3949	37.0214	-0.128977
44.82	19.8043	25.3949	37.0214	-0.151011
44.84	18.9665	25.3949	37.0214	-0.17364
44.86	18.156	25.3949	37.0214	-0.195533
44.88	17.421	25.3949	37.0214	-0.215387
44.9	16.8131	25.3949	37.0214	-0.231808
44.92	16.3934	25.3949	37.0214	-0.243144
44.94	16.2384	25.3949	37.0214	-0.247332
44.96	16.4394	25.3949	37.0214	-0.241901
44.98	17.0989	25.3949	37.0214	-0.224086
45	18.2664	25.3949	37.0214	-0.19255
45.02	19.9493	25.3949	37.0214	-0.147095
45.04	22.0383	25.3949	37.0214	-0.0906665
45.06	24.3052	25.3949	37.0214	-0.0294341
45.08	26.4366	25.3949	37.0214	0.0281363
45.1	28.1167	25.3949	37.0214	0.0735189
45.12	29.1147	25.3949	37.0214	0.100477
45.14	29.6724	25.3949	37.0214	0.115539
45.16	29.9219	25.3949	37.0214	0.12228
45.18	29.8192	25.3949	37.0214	0.119504
45.2	29.3075	25.3949	37.0214	0.105685
45.22	28.3435	25.3949	37.0214	0.0796454
45.24	26.9437	25.3949	37.0214	0.0418338
45.26	25.3611	25.3949	37.0214	-0.000914445
45.28	23.7732	25.3949	37.0214	-0.0438047
45.3	22.3163	25.3949	37.0214	-0.0831595
45.32	21.1629	25.3949	37.0214	-0.114314
45.34	20.5263	25.3949	37.0214	-0.131508
45.36	20.6235	25.3949	37.0214	-0.128882
45.38	21.5769	25.3949	37.0214	-0.103131
45.4	23.2804	25.3949	37.0214	-0.0571173
45.42	25.3228	25.3949	37.0214	-0.00194898
45.44	27.0757	25.3949	37.0214	0.0453993
45.46	27.9611	25.3949	37.0214	0.069316
45.48	28.0665	25.3949	37.0214	0.072164
45.5	27.8812	25.3949	37.0214	0.0671575
45.52	27.4934	25.3949	37.0214	0.0566825
45.54	26.9074	25.3949	37.0214	0.0408543
45.56	26.0258	25.3949	37.0214	0.0170395
45.58	24.7283	25.3949	37.0214	-0.0180064
45.6	23.1688	25.3949	37.0214	-0.0601307
45.62	21.607	25.3949	37.0214	-0.102317
45.64	20.1083	25.3949	37.0214	-0.1428
45.66	18.7348	25.3949	37.0214	-0.179899
45.68	17.5397	25.3949	37.0214	-0.212181
45.7	16.5576	25.3949	37.0214	-0.238708
45.72	15.7988	25.3949	37.0214	-0.259206
45.74	15.2491	25.3949	37.0214	-0.274053
45.76	14.8767	25.3949	37.0214	-0.284111
45.78	14.6414	25.3949	37.0214	-0.290469
45.8	14.5031	25.3949	37.0214	-0.294204
45.82	14.4282	25.3949	37.0214	-0.296227
45.84	14.3916	25.3949	37.0214	-0.297214
45.86	14.3766	25.3949	37.0214	-0.29762
45.88	14.3729	25.3949	37.0214	-0.29772
45.9	14.3749	25.3949	37.0214	-0.297667
45.92	14.3796	25.3949	37.0214	-0.297539
45.94	14.3857	25.3949	37.0214	-0.297373
45.96	14.3927	25.3949	37.0214	-0.297186
45.98	14.4002	25.3949	37.0214	-0.296982
46	14.4083	25.3949	37.0214	-0.296764
46.02	14.4169	25.3949	37.0214	-0.296532
46.04	14.426	25.3949	37.0214	-0.296285
46.06	14.4358	25.3949	37.0214	-0.296022
46.08	14.4461	25.3949	37.0214	-0.295742
46.1	14.4572	25.3949	37.0214	-0.295444
46.12	14.4689	25.3949	37.0214	-0.295127
46.14	14.4814	25.3949	37.0214	-0.294789
46.16	14.4948	25.3949	37.0214	-0.294428
46.18	14.5091	25.3949	37.0214	-0.294043
46.2	14.5243	25.3949	37.0214	-0.29363
46.22	14.5406	25.3949	37.0214	-0.293189
46.24	14.5581	25.3949	37.0214	-0.292717
46.26	14.5769	25.3949	37.0214	-0.292209
46.28	14.5971	25.3949	37.0214	-0.291663
46.3	14.6189	25.3949	37.0214	-0.291076
46.32	14.6424	25.3949	37.0214	-0.290441
46.34	14.6678	25.3949	37.0214	-0.289755
46.36	14.6953	25.3949	37.0214	-0.289011
46.38	14.7253	25.3949	37.0214	-0.288202
46.4	14.758	25.3949	37.0214	-0.287319
46.42	14.7939	25.3949	37.0214	-0.286349
46.44	14.8337	25.3949	37.0214	-0.285275
46.46	14.8783	25.3949	37.0214	-0.284069
46.48	14.9294	25.3949	37.0214	-0.282687
46.5	14.9901	25.3949	37.0214	-0.281048
46.52	15.0657	25.3949	37.0214	-0.279007
46.54	15.1654	25.3949	37.0214	-0.276314
46.56	15.3056	25.3949	37.0214	-0.272527
46.58	15.5136	25.3949	37.0214	-0.26691
46.6	15.8333	25.3949	37.0214	-0.258272
46.62	16.3334	25.3949	37.0214	-0.244765
46.64	17.1148	25.3949	37.0214	-0.223659
46.66	18.3195	25.3949	37.0214	-0.191116
46.68	20.1366	25.3949	37.0214	-0.142036
46.7	22.8013	25.3949	37.0214	-0.0700576
46.72	26.5866	25.3949	37.0214	0.0321877
46.74	31.7806	25.3949	37.0214	0.172486
46.76	38.6512	25.3949	37.0214	0.358071
46.78	47.3977	25.3949	37.0214	0.594326
46.8	58.0959	25.3949	37.0214	0.883299
46.82	70.6463	25.3949	37.0214	1.2223
46.84	84.7357	25.3949	37.0214	1.60287
46.86	99.824	25.3949	37.0214	2.01043
46.88	115.162	25.3949	37.0214	2.42474
46.9	129.845	25.3949	37.0214	2.82134
46.92	142.894	25.3949	37.0214	3.17382
46.94	153.379	25.3949	37.0214	3.45703
46.96	160.22	25.3949	37.0214	3.64181
46.98	155.633	25.3949	37.0214	3.51792
47	142.77	25.3949	37.0214	3.17046
47.02	129.435	25.3949	37.0214	2.81026
47.04	118.668	25.3949	37.0214	2.51943
47.06	110.201	25.3949	37.0214	2.29073
47.08	102.852	25.3949	37.0214	2.09221
47.1	92.5079	25.3949	37.0214	1.81282
47.12	78.8286	25.3949	37.0214	1.44332
47.14	65.7464	25.3949	37.0214	1.08995
47.16	55.148	25.3949	37.0214	0.803673
47.18	47.1091	25.3949	37.0214	0.58653
47.2	41.0897	25.3949	37.0214	0.423938
47.22	36.5362	25.3949	37.0214	0.300942
47.24	33.0326	25.3949	37.0214	0.206303
47.26	30.2919	25.3949	37.0214	0.132273
47.28	28.1176	25.3949	37.0214	0.0735427
47.3	26.3715	25.3949	37.0214	0.0263781
47.32	24.9536	25.3949	37.0214	-0.0119205
47.34	23.7902	25.3949	37.0214	-0.0433453
47.36	22.8264	25.3949	37.0214	-0.069381
47.38	22.0207	25.3949	37.0214	-0.0911435
47.4	21.342	25.3949	37.0214	-0.109476
47.42	20.7663	25.3949	37.0214	-0.125024
47.44	20.2754	25.3949	37.0214	-0.138285
47.46	19.8548	25.3949	37.0214	-0.149646
47.48	19.4933	25.3949	37.0214	-0.159411
47.5	19.1965	25.3949	37.0214	-0.167429
47.52	18.928	25.3949	37.0214	-0.17468
47.54	18.6967	25.3949	37.0214	-0.180928
47.56	18.4979	25.3949	37.0214	-0.186299
47.58	18.3277	25.3949	37.0214	-0.190895
47.6	18.1832	25.3949	37.0214	-0.194799
47.62	18.0618	25.3949	37.0214	-0.198078
47.64	17.9689	25.3949	37.0214	-0.200588
47.66	17.8884	25.3949	37.0214	-0.202763
47.68	17.8263	25.3949	37.0214	-0.204438
47.7	17.7819	25.3949	37.0214	-0.205637
47.72	17.7546	25.3949	37.0214	-0.206375
47.74	17.7442	25.3949	37.0214	-0.206658
47.76	17.7506	25.3949	37.0214	-0.206485
47.78	17.7742	25.3949	37.0214	-0.205847
47.8	17.8157	25.3949	37.0214	-0.204726
47.82	17.876	25.3949	37.0214	-0.203097
47.84	17.9565	25.3949	37.0214	-0.200922
47.86	18.0591	25.3949	37.0214	-0.198152
47.88	18.186	25.3949	37.0214	-0.194724
47.9	18.3402	25.3949	37.0214	-0.190559
47.92	18.5255	25.3949	37.0214	-0.185554
47.94	18.7466	25.3949	37.0214	-0.179581
47.96	19.0096	25.3949	37.0214	-0.172478
47.98	19.322	25.3949	37.0214	-0.164039
48	19.6936	25.3949	37.0214	-0.154002
48.02	20.1368	25.3949	37.0214	-0.142029
48.04	20.668	25.3949	37.0214	-0.127682
48.06	21.308	25.3949	37.0214	-0.110395
48.08	22.0843	25.3949	37.0214	-0.089424
48.1	23.033	25.3949	37.0214	-0.0637986
48.12	24.2013	25.3949	37.0214	-0.0322417
48.14	25.6519	25.3949	37.0214	0.006941
48.16	27.47	25.3949	37.0214	0.0560501
48.18	29.7838	25.3949	37.0214	0.118549
48.2	32.7472	25.3949	37.0214	0.198595
48.22	36.6157	25.3949	37.0214	0.303089
48.24	41.7192	25.3949	37.0214	0.44094
48.26	48.4067	25.3949	37.0214	0.621579
48.28	56.7775	25.3949	37.0214	0.847686
48.3	66.0469	25.3949	37.0214	1.09807
48.32	73.8613	25.3949	37.0214	1.30914
48.34	77.1352	25.3949	37.0214	1.39758
48.36	75.7553	25.3949	37.0214	1.3603
48.38	71.1887	25.3949	37.0214	1.23695
48.4	65.3137	25.3949	37.0214	1.07826
48.42	59.8803	25.3949	37.0214	0.931498
48.44	55.4878	25.3949	37.0214	0.812849
48.46	51.276	25.3949	37.0214	0.699084
48.48	46.41	25.3949	37.0214	0.567645
48.5	41.0674	25.3949	37.0214	0.423334
48.52	35.4818	25.3949	37.0214	0.27246
48.54	30.1576	25.3949	37.0214	0.128645
48.56	25.6353	25.3949	37.0214	0.00649289
48.58	22.2412	25.3949	37.0214	-0.0851867
48.6	20.0172	25.3949	37.0214	-0.145261
48.62	18.7902	25.3949	37.0214	-0.178404
48.64	18.3002	25.3949	37.0214	-0.191637
48.66	18.3097	25.3949	37.0214	-0.191383
48.68	18.6469	25.3949	37.0214	-0.182273
48.7	19.2292	25.3949	37.0214	-0.166546
48.72	20.0388	25.3949	37.0214	-0.144678
48.74	21.1115	25.3949	37.0214	-0.1157
48.76	22.5311	25.3949	37.0214	-0.0773569
48.78	24.4281	25.3949	37.0214	-0.0261161
48.8	26.9624	25.3949	37.0214	0.0423392
48.82	30.2293	25.3949	37.0214	0.130582
48.84	33.9964	25.3949	37.0214	0.232337
48.86	37.3311	25.3949	37.0214	0.322413
48.88	38.8126	25.3949	37.0214	0.362429
48.9	38.2098	25.3949	37.0214	0.346146
48.92	36.1822	25.3949	37.0214	0.291379
48.94	33.6006	25.3949	37.0214	0.221647
48.96	31.3176	25.3949	37.0214	0.159979
48.98	29.6794	25.3949	37.0214	0.115729
49	28.2957	25.3949	37.0214	0.0783542
49.02	26.6019	25.3949	37.0214	0.0326021
49.04	24.5957	25.3949	37.0214	-0.0215881
49.06	22.3744	25.3949	37.0214	-0.0815891
49.08	20.1893	25.3949	37.0214	-0.140611
49.1	18.3074	25.3949	37.0214	-0.191445
49.12	16.8867	25.3949	37.0214	-0.229818
49.14	15.9423	25.3949	37.0214	-0.255328
49.16	15.3869	25.3949	37.0214	-0.27033
49.18	15.0977	25.3949	37.0214	-0.278143
49.2	14.9671	25.3949	37.0214	-0.281672
49.22	14.9261	25.3949	37.0214	-0.282777
49.24	14.9498	25.3949	37.0214	-0.282137
49.26	15.0587	25.3949	37.0214	-0.279197
49.28	15.3246	25.3949	37.0214	-0.272014
49.3	15.877	25.3949	37.0214	-0.257094
49.32	16.8902	25.3949	37.0214	-0.229725
49.34	18.5326	25.3949	37.0214	-0.185361
49.36	20.871	25.3949	37.0214	-0.122199
49.38	23.7658	25.3949	37.0214	-0.044006
49.4	26.8323	25.3949	37.0214	0.0388255
49.42	29.539	25.3949	37.0214	0.111936
49.44	31.4413	25.3949	37.0214	0.16332
49.46	31.2694	25.3949	37.0214	0.158678
49.48	28.5834	25.3949	37.0214	0.0861249
49.5	27.5405	25.3949	37.0214	0.0579558
49.52	29.849	25.3949	37.0214	0.12031
49.54	35.0878	25.3949	37.0214	0.261817
49.56	42.4461	25.3949	37.0214	0.460575
49.58	51.4621	25.3949	37.0214	0.70411
49.6	60.8691	25.3949	37.0214	0.958207
49.62	71.6206	25.3949	37.0214	1.24862
49.64	84.6836	25.3949	37.0214	1.60147
49.66	99.3516	25.3949	37.0214	1.99767
49.68	114.072	25.3949	37.0214	2.39528
49.7	127.298	25.3949	37.0214	2.75253
49.72	137.805	25.3949	37.0214	3.03635
49.74	144.356	25.3949	37.0214	3.21329
49.76	138.12	25.3949	37.0214	3.04485
49.78	121.948	25.3949	37.0214	2.60802
49.8	104.526	25.3949	37.0214	2.13745
49.82	90.9772	25.3949	37.0214	1.77147
49.84	82.395	25.3949	37.0214	1.53965
49.86	77.26	25.3949	37.0214	1.40095
49.88	71.8983	25.3949	37.0214	1.25612
49.9	61.1724	25.3949	37.0214	0.9664
49.92	48.1914	25.3949	37.0214	0.615763
49.94	36.5141	25.3949	37.0214	0.300344
49.96	27.9593	25.3949	37.0214	0.0692665
[truncated: 2,002 more rows]
