# Supplementary material for: Development, physicochemical characterization and in-vitro biocompatibility study of dromedary camel dentine derived hydroxyapatite for bone repair
Source: PeerJ. 2023 Aug 3;11:e15711. doi: 10.7717/peerj.15711 (PMC10404400; doi:10.7717/peerj.15711)
Supplement: Supplemental Information 3 [file peerj-11-15711-s003.xlsx]

## Sheet: Sheet1
Result Type	Weight %
Statistics	C	O	Na	Mg	P	Ca	Sr
Max	6.29	45.2	1.68	2.46	17.8	43.03	0.51
Min	4.91	30.58	0.66	1.32	13.74	33.98	0.42
Average		37.63	1.22	1.87	16.32	37.78	0.46
Standard Deviation		5.63	0.41	0.43	1.54	3.85	0.04
Spectrum Label	Spectrum 1	Spectrum 2	Spectrum 3	Spectrum 4	Spectrum 5	Spectrum 6
C		6.29	4.91	5.82	5.39	5.9
O	45.2	41.18	41.01	33.93	33.89	30.58
Na	1.68	1.59	1.42	1.08	0.87	0.66
Mg	2.46	2.04	2.17	1.32	1.67	1.57
P	16.17	13.74	15.46	17.37	17.39	17.8
Ca	33.98	34.68	34.54	40.07	40.37	43.03
Sr	0.51	0.48	0.49	0.42	0.42	0.46
Total	100	100	100	100	100	100
