# Supplementary material for: Development, physicochemical characterization and in-vitro biocompatibility study of dromedary camel dentine derived hydroxyapatite for bone repair
Source: PeerJ. 2023 Aug 3;11:e15711. doi: 10.7717/peerj.15711 (PMC10404400; doi:10.7717/peerj.15711)
Supplement: Supplemental Information 6 [file peerj-11-15711-s006.xlsx]

## Sheet: 24 h
##BLOCKS= 3
Plate:	Plate1	1.3	PlateFormat	Endpoint	Absorbance	Raw	FALSE	1						1	490	1	12	96	1	8
	Temperature(¡C)	1	2	3	4	5	6	7	8	9	10	11	12
	22	0.1459	0.165	0.288	0.0333	0.0334	0.0335	0.0334	0.1535	0.0334	0.0339	0.0337	0.0332
		0.1813	0.163	0.2392	0.034	0.0336	0.0337	0.0337	0.0342	0.0339	0.0341	0.0338	0.0334
		0.1806	0.1746	0.295	0.0346	0.0339	0.0337	0.0338	0.0338	0.0344	0.034	0.0338	0.0334
		0.1686	0.1499	0.0339	0.034	0.0345	0.0341	0.0351	0.0339	0.0341	0.0342	0.0338	0.0337
		0.0338	0.0342	0.0342	0.0349	0.034	0.0357	0.0352	0.0345	0.0348	0.0342	0.0347	0.0336
		0.0334	0.034	0.0345	0.0339	0.0346	0.0345	0.0343	0.0337	0.0344	0.0344	0.0342	0.0339
		0.5475	0.3957	0.2821	0.2101	0.1906	0.1389	0.1623	0.1644	0.0342	0.0337	0.0343	0.0339
		0.5445	0.3949	0.2652	0.2124	0.1859	0.1565	0.1602	0.1481	0.035	0.0334	0.0337	0.0337
		1	2	3	4	5	6	7	8	9	10	11	12
		0.1459	0.165	0.288	0.0333	0.0334	0.0335	0.0334	0.1535	0.0334	0.0339	0.0337	0.0332
		0.1813	0.163	0.2392	0.034	0.0336	0.0337	0.0337	0.0342	0.0339	0.0341	0.0338	0.0334
		0.1806	0.1746	0.295	0.0346	0.0339	0.0337	0.0338	0.0338	0.0344	0.034	0.0338	0.0334
		0.1686	0.1499	0.0339	0.034	0.0345	0.0341	0.0351	0.0339	0.0341	0.0342	0.0338	0.0337
		0.0338	0.0342	0.0342	0.0349	0.034	0.0357	0.0352	0.0345	0.0348	0.0342	0.0347	0.0336
		0.0334	0.034	0.0345	0.0339	0.0346	0.0345	0.0343	0.0337	0.0344	0.0344	0.0342	0.0339
		0.5475	0.3957	0.2821	0.2101	0.1906	0.1389	0.1623	0.1644	0.0342	0.0337	0.0343	0.0339
		0.5445	0.3949	0.2652	0.2124	0.1859	0.1565	0.1602	0.1481	0.035	0.0334	0.0337	0.0337
~End
Group: Standards
Sample	Conc	BackCalcConc	Wells	Value	MeanValue	SD	CV
1	12.8	13.97	A1	0.146	0.155	0.014	8.7
		6.392	A2	0.165
2	6.4	-0.076	B1	0.181	0.172	0.013	7.5
		7.185	B2	0.163
3	3.2	0.202	C1	0.181	0.178	0.004	2.4
		2.583	C2	0.175
4	1.6	4.963	D1	0.169	0.159	0.013	8.3
		12.383	D2	0.15
5	0.8	58.448	E1	0.034	0.034	0	0.8
		58.29	E2	0.034
6	0.4	58.607	F1	0.033	0.034	0	1.3
		58.369	F2	0.034
7	0.2	-145.374	G1	0.547	0.472	0.107	22.8
		-85.144	G2	0.396
Group Column	Formula Name	Formula	Precision	Notation
1	Sample	!SampleNames	2 decimal places	Numeric
2	Conc	!Concentration	3 decimal places	Numeric
3	BackCalcConc	InterpX(Std@StandardCurve,Value)	3 decimal places	Numeric
4	Wells	!WellIDs	2 decimal places	Numeric
5	Value	!WellValues	3 decimal places	Numeric
6	MeanValue	Average(Value)	3 decimal places	Numeric
7	SD	Stdev(Value)	3 decimal places	Numeric
8	CV	Cv(Value)	1 decimal places	Numeric
Group Summaries
MinStd	Smallest standard value:	0.034	Min(MeanValue)	3 decimal places	Numeric Notation
MaxStd	Largest standard value:	0.472	Max(MeanValue)	3 decimal places	Numeric Notation
~End
Group: Unknowns
Sample	Wells	Value	R	Result	MeanResult	SD	CV
1	A3	0.288		-42.411	-42.411	0	0
2	B3	0.239		-23.049	-23.049	0	0
3	C3	0.295		-45.189	-45.189	0	0
4	D3	0.034		58.409	58.409	0	0
5	E3	0.034		58.29	58.29	0	0
6	F3	0.035		58.171	58.171	0	0
7	G3	0.282		-40.07	-40.07	0	0
8	H3	0.265		-33.365	-33.365	0	0
9	A4	0.033	R	58.647	58.647	0	0
10	B4	0.034		58.369	58.369	0	0
11	C4	0.035		58.131	58.131	0	0
12	D4	0.034		58.369	58.369	0	0
13	E4	0.035		58.012	58.012	0	0
14	F4	0.034		58.409	58.409	0	0
15	G4	0.21		-11.503	-11.503	0	0
16	H4	0.212		-12.415	-12.415	0	0
17	A5	0.033	R	58.607	58.607	0	0
18	B5	0.034	R	58.528	58.528	0	0
19	C5	0.034		58.409	58.409	0	0
20	D5	0.035		58.171	58.171	0	0
21	E5	0.034		58.369	58.369	0	0
22	F5	0.035		58.131	58.131	0	0
23	G5	0.191		-3.766	-3.766	0	0
24	H5	0.186		-1.901	-1.901	0	0
25	A6	0.034	R	58.568	58.568	0	0
26	B6	0.034		58.488	58.488	0	0
27	C6	0.034		58.488	58.488	0	0
28	D6	0.034		58.329	58.329	0	0
29	E6	0.036		57.695	57.695	0	0
30	F6	0.035		58.171	58.171	0	0
31	G6	0.139		16.748	16.748	0	0
32	H6	0.157		9.764	9.764	0	0
33	A7	0.033	R	58.607	58.607	0	0
34	B7	0.034		58.488	58.488	0	0
35	C7	0.034		58.448	58.448	0	0
36	D7	0.035		57.933	57.933	0	0
37	E7	0.035		57.893	57.893	0	0
38	F7	0.034		58.25	58.25	0	0
39	G7	0.162		7.463	7.463	0	0
40	H7	0.16		8.296	8.296	0	0
41	A8	0.153		10.955	10.955	0	0
42	B8	0.034		58.29	58.29	0	0
43	C8	0.034		58.448	58.448	0	0
44	D8	0.034		58.409	58.409	0	0
45	E8	0.035		58.171	58.171	0	0
46	F8	0.034		58.488	58.488	0	0
47	G8	0.164		6.63	6.63	0	0
48	H8	0.148		13.097	13.097	0	0
49	A9	0.033	R	58.607	58.607	0	0
50	B9	0.034		58.409	58.409	0	0
51	C9	0.034		58.21	58.21	0	0
52	D9	0.034		58.329	58.329	0	0
53	E9	0.035		58.052	58.052	0	0
54	F9	0.034		58.21	58.21	0	0
55	G9	0.034		58.29	58.29	0	0
56	H9	0.035		57.972	57.972	0	0
57	A10	0.034		58.409	58.409	0	0
58	B10	0.034		58.329	58.329	0	0
59	C10	0.034		58.369	58.369	0	0
60	D10	0.034		58.29	58.29	0	0
61	E10	0.034		58.29	58.29	0	0
62	F10	0.034		58.21	58.21	0	0
63	G10	0.034		58.488	58.488	0	0
64	H10	0.033	R	58.607	58.607	0	0
65	A11	0.034		58.488	58.488	0	0
66	B11	0.034		58.448	58.448	0	0
67	C11	0.034		58.448	58.448	0	0
68	D11	0.034		58.448	58.448	0	0
69	E11	0.035		58.091	58.091	0	0
70	F11	0.034		58.29	58.29	0	0
71	G11	0.034		58.25	58.25	0	0
72	H11	0.034		58.488	58.488	0	0
73	A12	0.033	R	58.687	58.687	0	0
74	B12	0.033	R	58.607	58.607	0	0
75	C12	0.033	R	58.607	58.607	0	0
76	D12	0.034		58.488	58.488	0	0
77	E12	0.034	R	58.528	58.528	0	0
78	F12	0.034		58.409	58.409	0	0
79	G12	0.034		58.409	58.409	0	0
80	H12	0.034		58.488	58.488	0	0
Group Column	Formula Name	Formula	Precision	Notation
1	Sample	!SampleNames	2 decimal places	Numeric
2	Wells	!WellIDs	2 decimal places	Numeric
3	Value	!WellValues	3 decimal places	Numeric
4	R	If (Value>=MinStd@Standards and Value<=MaxStd@Standards,"","R")	3 decimal places	Numeric
5	Result	InterpX(Std@StandardCurve,Value)	3 decimal places	Numeric
6	MeanResult	Average(Result)	3 decimal places	Numeric
7	SD	Stdev(Result)	3 decimal places	Numeric
8	CV	Cv(Result)	1 decimal places	Numeric
Group Summaries
InRange	R - Outside standard range			0 decimal places	Numeric Notation
~End
Original Filename: 24 h; Date Last Saved: 1/31/2023 12:52:45 PM
