# Supplementary material for: Development, physicochemical characterization and in-vitro biocompatibility study of dromedary camel dentine derived hydroxyapatite for bone repair
Source: PeerJ. 2023 Aug 3;11:e15711. doi: 10.7717/peerj.15711 (PMC10404400; doi:10.7717/peerj.15711)
Supplement: Supplemental Information 7 [file peerj-11-15711-s007.xlsx]

## Sheet: 48h 2
##BLOCKS= 3
Plate:	Plate1	1.3	PlateFormat	Endpoint	Absorbance	Raw	FALSE	1						1	490	1	12	96	1	8
	Temperature(¡C)	1	2	3	4	5	6	7	8	9	10	11	12
	23.5	0.1751	0.1755	0.2519	0.0322	0.3404	0.2432	0.0323	0.0324	0.0321	0.0326	0.0323	0.0325
		0.1552	0.1809	0.2607	0.0329	0.3296	0.1978	0.033	0.0329	0.033	0.0334	0.0333	0.0322
		0.16	0.1813	0.3512	0.033	0.2478	0.0324	0.0328	0.0329	0.0329	0.0328	0.0332	0.0327
		0.1668	0.1683	0.0331	0.0332	0.2406	0.0331	0.033	0.0331	0.0332	0.0328	0.0328	0.0325
		0.0321	0.0326	0.0331	0.033	0.0332	0.0336	0.033	0.033	0.0332	0.0331	0.033	0.0324
		0.0321	0.0326	0.033	0.0334	0.033	0.0328	0.0324	0.0332	0.0336	0.0332	0.0331	0.0325
		0.8882	0.7523	0.5221	0.3115	0.2184	0.1958	0.1734	0.1695	0.0327	0.0325	0.0329	0.0328
		0.6157	0.528	0.3436	0.2505	0.2214	0.1868	0.1668	0.156	0.0326	0.0322	0.0323	0.0324
		1	2	3	4	5	6	7	8	9	10	11	12
		0.1751	0.1755	0.2519	0.0322	0.3404	0.2432	0.0323	0.0324	0.0321	0.0326	0.0323	0.0325
		0.1552	0.1809	0.2607	0.0329	0.3296	0.1978	0.033	0.0329	0.033	0.0334	0.0333	0.0322
		0.16	0.1813	0.3512	0.033	0.2478	0.0324	0.0328	0.0329	0.0329	0.0328	0.0332	0.0327
		0.1668	0.1683	0.0331	0.0332	0.2406	0.0331	0.033	0.0331	0.0332	0.0328	0.0328	0.0325
		0.0321	0.0326	0.0331	0.033	0.0332	0.0336	0.033	0.033	0.0332	0.0331	0.033	0.0324
		0.0321	0.0326	0.033	0.0334	0.033	0.0328	0.0324	0.0332	0.0336	0.0332	0.0331	0.0325
		0.8882	0.7523	0.5221	0.3115	0.2184	0.1958	0.1734	0.1695	0.0327	0.0325	0.0329	0.0328
		0.6157	0.528	0.3436	0.2505	0.2214	0.1868	0.1668	0.156	0.0326	0.0322	0.0323	0.0324
~End
Group: Standards
Sample	Conc	BackCalcConc	Wells	Value	MeanValue	SD	CV
1	12.8	8.19	A1	0.175	0.175	0	0.2
		8.153	A2	0.175
2	6.4	10.054	B1	0.155	0.168	0.018	10.8
		7.647	B2	0.181
3	3.2	9.605	C1	0.16	0.171	0.015	8.8
		7.609	C2	0.181
4	1.6	8.968	D1	0.167	0.168	0.001	0.6
		8.827	D2	0.168
5	0.8	21.588	E1	0.032	0.032	0	1.1
		21.541	E2	0.033
6	0.4	21.588	F1	0.032	0.032	0	1.1
		21.541	F2	0.033
7	0.2	-58.621	G1	0.888	0.82	0.096	11.7
		-45.889	G2	0.752
Group Column	Formula Name	Formula	Precision	Notation
1	Sample	!SampleNames	2 decimal places	Numeric
2	Conc	!Concentration	3 decimal places	Numeric
3	BackCalcConc	InterpX(Std@StandardCurve,Value)	3 decimal places	Numeric
4	Wells	!WellIDs	2 decimal places	Numeric
5	Value	!WellValues	3 decimal places	Numeric
6	MeanValue	Average(Value)	3 decimal places	Numeric
7	SD	Stdev(Value)	3 decimal places	Numeric
8	CV	Cv(Value)	1 decimal places	Numeric
Group Summaries
MinStd	Smallest standard value:	0.032	Min(MeanValue)	3 decimal places	Numeric Notation
MaxStd	Largest standard value:	0.82	Max(MeanValue)	3 decimal places	Numeric Notation
~End
Group: Unknowns
Sample	Wells	Value	R	Result	MeanResult	SD	CV
1	A3	0.252		0.995	0.995	0	0
2	B3	0.261		0.17	0.17	0	0
3	C3	0.351		-8.309	-8.309	0	0
4	D3	0.033		21.494	21.494	0	0
5	E3	0.033		21.494	21.494	0	0
6	F3	0.033		21.504	21.504	0	0
7	G3	0.522		-24.321	-24.321	0	0
8	H3	0.344		-7.597	-7.597	0	0
9	A4	0.032	R	21.579	21.579	0	0
10	B4	0.033		21.513	21.513	0	0
11	C4	0.033		21.504	21.504	0	0
12	D4	0.033		21.485	21.485	0	0
13	E4	0.033		21.504	21.504	0	0
14	F4	0.033		21.466	21.466	0	0
15	G4	0.311		-4.59	-4.59	0	0
16	H4	0.251		1.126	1.126	0	0
17	A5	0.34		-7.297	-7.297	0	0
18	B5	0.33		-6.285	-6.285	0	0
19	C5	0.248		1.379	1.379	0	0
20	D5	0.241		2.053	2.053	0	0
21	E5	0.033		21.485	21.485	0	0
22	F5	0.033		21.504	21.504	0	0
23	G5	0.218		4.133	4.133	0	0
24	H5	0.221		3.852	3.852	0	0
25	A6	0.243		1.81	1.81	0	0
26	B6	0.198		6.063	6.063	0	0
27	C6	0.032		21.56	21.56	0	0
28	D6	0.033		21.494	21.494	0	0
29	E6	0.034		21.447	21.447	0	0
30	F6	0.033		21.522	21.522	0	0
31	G6	0.196		6.251	6.251	0	0
32	H6	0.187		7.094	7.094	0	0
33	A7	0.032	R	21.569	21.569	0	0
34	B7	0.033		21.504	21.504	0	0
35	C7	0.033		21.522	21.522	0	0
36	D7	0.033		21.504	21.504	0	0
37	E7	0.033		21.504	21.504	0	0
38	F7	0.032		21.56	21.56	0	0
39	G7	0.173		8.349	8.349	0	0
40	H7	0.167		8.968	8.968	0	0
41	A8	0.032		21.56	21.56	0	0
42	B8	0.033		21.513	21.513	0	0
43	C8	0.033		21.513	21.513	0	0
44	D8	0.033		21.494	21.494	0	0
45	E8	0.033		21.504	21.504	0	0
46	F8	0.033		21.485	21.485	0	0
47	G8	0.17		8.715	8.715	0	0
48	H8	0.156		9.98	9.98	0	0
49	A9	0.032	R	21.588	21.588	0	0
50	B9	0.033		21.504	21.504	0	0
51	C9	0.033		21.513	21.513	0	0
52	D9	0.033		21.485	21.485	0	0
53	E9	0.033		21.485	21.485	0	0
54	F9	0.034		21.447	21.447	0	0
55	G9	0.033		21.532	21.532	0	0
56	H9	0.033		21.541	21.541	0	0
57	A10	0.033		21.541	21.541	0	0
58	B10	0.033		21.466	21.466	0	0
59	C10	0.033		21.522	21.522	0	0
60	D10	0.033		21.522	21.522	0	0
61	E10	0.033		21.494	21.494	0	0
62	F10	0.033		21.485	21.485	0	0
63	G10	0.033		21.55	21.55	0	0
64	H10	0.032	R	21.579	21.579	0	0
65	A11	0.032	R	21.569	21.569	0	0
66	B11	0.033		21.475	21.475	0	0
67	C11	0.033		21.485	21.485	0	0
68	D11	0.033		21.522	21.522	0	0
69	E11	0.033		21.504	21.504	0	0
70	F11	0.033		21.494	21.494	0	0
71	G11	0.033		21.513	21.513	0	0
72	H11	0.032	R	21.569	21.569	0	0
73	A12	0.033		21.55	21.55	0	0
74	B12	0.032	R	21.579	21.579	0	0
75	C12	0.033		21.532	21.532	0	0
76	D12	0.033		21.55	21.55	0	0
77	E12	0.032		21.56	21.56	0	0
78	F12	0.033		21.55	21.55	0	0
79	G12	0.033		21.522	21.522	0	0
80	H12	0.032		21.56	21.56	0	0
Group Column	Formula Name	Formula	Precision	Notation
1	Sample	!SampleNames	2 decimal places	Numeric
2	Wells	!WellIDs	2 decimal places	Numeric
3	Value	!WellValues	3 decimal places	Numeric
4	R	If (Value>=MinStd@Standards and Value<=MaxStd@Standards,"","R")	3 decimal places	Numeric
5	Result	InterpX(Std@StandardCurve,Value)	3 decimal places	Numeric
6	MeanResult	Average(Result)	3 decimal places	Numeric
7	SD	Stdev(Result)	3 decimal places	Numeric
8	CV	Cv(Result)	1 decimal places	Numeric
Group Summaries
InRange	R - Outside standard range			0 decimal places	Numeric Notation
~End
Original Filename: 48h 2; Date Last Saved: 2/1/2023 4:49:56 PM
