# Supplementary material for: Development, physicochemical characterization and in-vitro biocompatibility study of dromedary camel dentine derived hydroxyapatite for bone repair
Source: PeerJ. 2023 Aug 3;11:e15711. doi: 10.7717/peerj.15711 (PMC10404400; doi:10.7717/peerj.15711)
Supplement: Supplemental Information 8 [file peerj-11-15711-s008.xlsx]

## Sheet: 72 2
##BLOCKS= 3
Plate:	Plate1	1.3	PlateFormat	Endpoint	Absorbance	Raw	FALSE	1						1	490	1	12	96	1	8
	Temperature(¡C)	1	2	3	4	5	6	7	8	9	10	11	12
	23.5	0.2958	0.2326	0.3889	0.0325	0.397	0.0321	0.1686	0.0324	0.0324	0.0329	0.0328	0.0326
		0.1488	0.2319	0.5845	0.0329	0.4389	0.0325	0.0326	0.0328	0.0329	0.0331	0.0327	0.0323
		0.2614	0.1896	0.2085	0.0329	0.4302	0.0326	0.0327	0.0331	0.0329	0.0333	0.0328	0.0326
		0.2156	0.1986	0.0948	0.0334	0.4183	0.0332	0.0332	0.0338	0.0337	0.0332	0.033	0.0329
		0.0327	0.033	0.0328	0.0333	0.0332	0.0336	0.0338	0.0334	0.0336	0.0334	0.033	0.0327
		0.0322	0.0335	0.0327	0.0334	0.0334	0.0328	0.0322	0.0329	0.0334	0.0335	0.033	0.0327
		1.5311	1.1536	0.6019	0.4484	0.2409	0.2454	0.2128	0.033	0.0333	0.0334	0.0329	0.0329
		1.3916	0.921	0.5746	0.3665	0.2902	0.2096	0.2094	0.0326	0.0324	0.0329	0.0323	0.0326
		1	2	3	4	5	6	7	8	9	10	11	12
		0.2958	0.2326	0.3889	0.0325	0.397	0.0321	0.1686	0.0324	0.0324	0.0329	0.0328	0.0326
		0.1488	0.2319	0.5845	0.0329	0.4389	0.0325	0.0326	0.0328	0.0329	0.0331	0.0327	0.0323
		0.2614	0.1896	0.2085	0.0329	0.4302	0.0326	0.0327	0.0331	0.0329	0.0333	0.0328	0.0326
		0.2156	0.1986	0.0948	0.0334	0.4183	0.0332	0.0332	0.0338	0.0337	0.0332	0.033	0.0329
		0.0327	0.033	0.0328	0.0333	0.0332	0.0336	0.0338	0.0334	0.0336	0.0334	0.033	0.0327
		0.0322	0.0335	0.0327	0.0334	0.0334	0.0328	0.0322	0.0329	0.0334	0.0335	0.033	0.0327
		1.5311	1.1536	0.6019	0.4484	0.2409	0.2454	0.2128	0.033	0.0333	0.0334	0.0329	0.0329
		1.3916	0.921	0.5746	0.3665	0.2902	0.2096	0.2094	0.0326	0.0324	0.0329	0.0323	0.0326
~End
Group: Standards
Sample	Conc	BackCalcConc	Wells	Value	MeanValue	SD	CV
1	12.8	5.34	A1	0.296	0.264	0.045	16.9
		8.711	A2	0.233
2	6.4	13.181	B1	0.149	0.19	0.059	30.9
		8.748	B2	0.232
3	3.2	7.175	C1	0.261	0.226	0.051	22.5
		11.004	C2	0.19
4	1.6	9.618	D1	0.216	0.207	0.012	5.8
		10.524	D2	0.199
5	0.8	19.373	E1	0.033	0.033	0	0.6
		19.357	E2	0.033
6	0.4	19.4	F1	0.032	0.033	0.001	2.8
		19.33	F2	0.034
7	0.2	-60.548	G1	1.531	1.342	0.267	19.9
		-40.413	G2	1.154
Group Column	Formula Name	Formula	Precision	Notation
1	Sample	!SampleNames	2 decimal places	Numeric
2	Conc	!Concentration	3 decimal places	Numeric
3	BackCalcConc	InterpX(Std@StandardCurve,Value)	3 decimal places	Numeric
4	Wells	!WellIDs	2 decimal places	Numeric
5	Value	!WellValues	3 decimal places	Numeric
6	MeanValue	Average(Value)	3 decimal places	Numeric
7	SD	Stdev(Value)	3 decimal places	Numeric
8	CV	Cv(Value)	1 decimal places	Numeric
Group Summaries
MinStd	Smallest standard value:	0.033	Min(MeanValue)	3 decimal places	Numeric Notation
MaxStd	Largest standard value:	1.342	Max(MeanValue)	3 decimal places	Numeric Notation
~End
Group: Unknowns
Sample	Wells	Value	R	Result	MeanResult	SD	CV
1	A3	0.389		0.374	0.374	0	0
2	B3	0.585		-10.059	-10.059	0	0
3	C3	0.208		9.996	9.996	0	0
4	D3	0.095		16.061	16.061	0	0
5	E3	0.033	R	19.368	19.368	0	0
6	F3	0.033	R	19.373	19.373	0	0
7	G3	0.602		-10.987	-10.987	0	0
8	H3	0.575		-9.531	-9.531	0	0
9	A4	0.033	R	19.384	19.384	0	0
10	B4	0.033		19.362	19.362	0	0
11	C4	0.033		19.362	19.362	0	0
12	D4	0.033		19.336	19.336	0	0
13	E4	0.033		19.341	19.341	0	0
14	F4	0.033		19.336	19.336	0	0
15	G4	0.448		-2.799	-2.799	0	0
16	H4	0.366		1.569	1.569	0	0
17	A5	0.397		-0.058	-0.058	0	0
18	B5	0.439		-2.293	-2.293	0	0
19	C5	0.43		-1.829	-1.829	0	0
20	D5	0.418		-1.194	-1.194	0	0
21	E5	0.033		19.346	19.346	0	0
22	F5	0.033		19.336	19.336	0	0
23	G5	0.241		8.268	8.268	0	0
24	H5	0.29		5.639	5.639	0	0
25	A6	0.032	R	19.405	19.405	0	0
26	B6	0.033	R	19.384	19.384	0	0
27	C6	0.033	R	19.378	19.378	0	0
28	D6	0.033		19.346	19.346	0	0
29	E6	0.034		19.325	19.325	0	0
30	F6	0.033	R	19.368	19.368	0	0
31	G6	0.245		8.028	8.028	0	0
32	H6	0.21		9.938	9.938	0	0
33	A7	0.169		12.125	12.125	0	0
34	B7	0.033	R	19.378	19.378	0	0
35	C7	0.033	R	19.373	19.373	0	0
36	D7	0.033		19.346	19.346	0	0
37	E7	0.034		19.314	19.314	0	0
38	F7	0.032	R	19.4	19.4	0	0
39	G7	0.213		9.767	9.767	0	0
40	H7	0.209		9.948	9.948	0	0
41	A8	0.032	R	19.389	19.389	0	0
42	B8	0.033	R	19.368	19.368	0	0
43	C8	0.033		19.352	19.352	0	0
44	D8	0.034		19.314	19.314	0	0
45	E8	0.033		19.336	19.336	0	0
46	F8	0.033		19.362	19.362	0	0
47	G8	0.033		19.357	19.357	0	0
48	H8	0.033	R	19.378	19.378	0	0
49	A9	0.032	R	19.389	19.389	0	0
50	B9	0.033		19.362	19.362	0	0
51	C9	0.033		19.362	19.362	0	0
52	D9	0.034		19.32	19.32	0	0
53	E9	0.034		19.325	19.325	0	0
54	F9	0.033		19.336	19.336	0	0
55	G9	0.033		19.341	19.341	0	0
56	H9	0.032	R	19.389	19.389	0	0
57	A10	0.033		19.362	19.362	0	0
58	B10	0.033		19.352	19.352	0	0
59	C10	0.033		19.341	19.341	0	0
60	D10	0.033		19.346	19.346	0	0
61	E10	0.033		19.336	19.336	0	0
62	F10	0.034		19.33	19.33	0	0
63	G10	0.033		19.336	19.336	0	0
64	H10	0.033		19.362	19.362	0	0
65	A11	0.033	R	19.368	19.368	0	0
66	B11	0.033	R	19.373	19.373	0	0
67	C11	0.033	R	19.368	19.368	0	0
68	D11	0.033		19.357	19.357	0	0
69	E11	0.033		19.357	19.357	0	0
70	F11	0.033		19.357	19.357	0	0
71	G11	0.033		19.362	19.362	0	0
72	H11	0.032	R	19.394	19.394	0	0
73	A12	0.033	R	19.378	19.378	0	0
74	B12	0.032	R	19.394	19.394	0	0
75	C12	0.033	R	19.378	19.378	0	0
76	D12	0.033		19.362	19.362	0	0
77	E12	0.033	R	19.373	19.373	0	0
78	F12	0.033	R	19.373	19.373	0	0
79	G12	0.033		19.362	19.362	0	0
80	H12	0.033	R	19.378	19.378	0	0
Group Column	Formula Name	Formula	Precision	Notation
1	Sample	!SampleNames	2 decimal places	Numeric
2	Wells	!WellIDs	2 decimal places	Numeric
3	Value	!WellValues	3 decimal places	Numeric
4	R	If (Value>=MinStd@Standards and Value<=MaxStd@Standards,"","R")	3 decimal places	Numeric
5	Result	InterpX(Std@StandardCurve,Value)	3 decimal places	Numeric
6	MeanResult	Average(Result)	3 decimal places	Numeric
7	SD	Stdev(Result)	3 decimal places	Numeric
8	CV	Cv(Result)	1 decimal places	Numeric
Group Summaries
InRange	R - Outside standard range			0 decimal places	Numeric Notation
~End
Original Filename: 72 2; Date Last Saved: 2/2/2023 1:00:12 PM
